# Supplementary material for: Study on the inhibitory mechanism of fig leaf extract against postharvest Fusarium in melon
Source: PeerJ. 2024 Jul 25;12:e17654. doi: 10.7717/peerj.17654 (PMC11283778; doi:10.7717/peerj.17654)
Supplement: Supplemental Information 1 [file peerj-12-17654-s001.xlsx]

## Sheet: Sheet1
MDA	repeat 1		repeat-2		repeat-3																	Time	MDA		control		Process
	A532	A600	A532	A600	A532	A600																h	nmol/g	0	2.84791	0.2838	2.89054	0.29537
blank							A			value			average			0	3	6	12	24				3	3.14634	0.2304	4.16954	0.22153
CK-0	0.042	0.026	0.029	0.013	0.015	0.003	0.016	0.016	0.012	3.01844	3.01844	2.50684	2.84791		control	2.84791	3.14634	3.53004	3.99901	4.08427		43.4132		6	3.53004	0.3573	4.93694	0.33839
Process-0	0.119	0.105	0.03	0.012	0.031	0.018	0.014	0.018	0.013	2.76264	3.27424	2.63474	2.89054		Process	2.89054	4.16954	4.93694	5.61907	6.21594		115.044		12	3.99901	0.3428	5.61907	0.32187
																								24	4.08427	0.2877	6.21594	0.19537
CK-3	0.031	0.013	0.032	0.014	0.052	0.037	0.018	0.018	0.015	3.27424	3.27424	2.89054	3.14634		standard deviation	0.2838	0.2304	0.3573	0.3428	0.2877
Process-3	0.063	0.043	0.053	0.024	0.029	0.003	0.02	0.029	0.026	3.53004	4.68114	4.29744	4.16954			0.3221	0.6318	0.3672	0.4027	0.6465
															standard deviation	0.29537	0.22153	0.33839	0.32187	0.19537
CK-6	0.104	0.082	0.07	0.049	0.03	0.013	0.022	0.021	0.017	3.78584	3.65794	3.14634	3.53004			0.33839	0.58611	0.22153	0.39074	0.6395					control		Process
Process-6	0.052	0.02	0.045	0.016	0.046	0.014	0.032	0.029	0.032	5.06484	4.68114	5.06484	4.93694			Aa	Aa	Aa	Aa	Aa				0	4.23562	0.2968	4.74563	0.27303
																Aa	Ab	Bb	Bb	Bb		Time	H2O2	3	4.59938	0.282	6.63563	0.35582
CK-12	0.023	0.002	0.052	0.026	0.031	0.007	0.021	0.026	0.024	3.65794	4.29744	4.04164	3.99901		siq	0.877	0.047	0.004	0.005	0.005		h	mmol/mg prot	6	4.68187	0.4474	6.81937	0.43952
Process-12	0.062	0.023	0.084	0.047	0.053	0.02	0.039	0.037	0.033	5.96014	5.70434	5.19274	5.61907	3.01844	3.27424	3.78584	3.65794	4.04164						12	5.28562	0.6831	7.75687	0.39009
														3.01844	3.27424	3.65794	4.29744	4.29744						24	5.25188	0.3202	7.84312	0.45425
CK-24	0.042	0.018	0.034	0.008	0.025	0.002	0.024	0.026	0.023	4.04164	4.29744	3.91374	4.08427	2.50684	2.89054	3.14634	4.04164	3.91374
Process-24	0.09	0.044	0.084	0.048	0.048	0.007	0.046	0.036	0.041	6.85544	5.57644	6.21594	6.21594	2.76264	3.53004	5.06484	5.96014	6.85544
														3.27424	4.68114	4.68114	5.70434	5.57644
														2.63474	4.29744	5.06484	5.19274	6.21594
H2O2
	repeat-1	repaet-2	repeat-3
blank	0.082			A			value			average
CK-0	0.43	0.471	0.428	0.348	0.389	0.346	4.08938	4.55063	4.06687	4.23562	4.20188	4.96687		0	3	6	12	24
Process-0	0.461	0.494	0.51	0.379	0.412	0.428	4.43813	4.80938	4.98937	4.74563	4.88812	5.72063	control	4.23562	4.59938	4.68187	5.28562	5.25188			4.08938	4.43813
											4.70812	5.16937	Process	4.74563	6.63563	6.81937	7.75687	7.84312			4.55063	4.80938
CK-3	0.44	0.501	0.485	0.358	0.419	0.403	4.20188	4.88812	4.70812	4.59938	6.44062	7.89187									4.06687	4.98937
Process-3	0.639	0.656	0.674	0.557	0.574	0.592	6.44062	6.63187	6.83437	6.63563	6.63187	8.22937	standard deviation	0.2968	0.282	0.4474	0.6831	0.3202
											6.83437	7.14938		0.1746	0.2922	0.2288	0.4615	0.084
CK-6	0.48	0.445	0.523	0.398	0.363	0.441	4.65188	4.25812	5.13563	4.68187	4.65188	4.73062	standard deviation	0.27303	0.35582	0.43952	0.39009	0.45425
Process-6	0.683	0.682	0.653	0.601	0.6	0.571	6.93562	6.92438	6.59812	6.81937	4.25812	5.46188		0.2811	0.1969	0.19169	0.55251	0.07981
											5.13563	5.56313		Aa	Aa	Aa	Aa	Aa
CK-12	0.508	0.575	0.526	0.426	0.493	0.444	4.96687	5.72063	5.16937	5.28562	6.93562	7.75687		Bb	Bb	Bb	Bb	Bb
Process-12	0.768	0.798	0.702	0.686	0.716	0.62	7.89187	8.22937	7.14938	7.75687	6.92438	7.85813		0.087	0.001	0.002	0.003	0.001
											6.59812	7.91437
CK-24	0.487	0.552	0.561	0.405	0.47	0.479	4.73062	5.46188	5.56313	5.25188				23.9929
Process-24	0.756	0.765	0.77	0.674	0.683	0.688	7.75687	7.85813	7.91437	7.84312				65.2706
																					control		Process
Conductivity																				0	23.3333	2.6324	24.3333	1.5125
	0h	0.5h	1.5h	2.5h	3.5h	4.5h	5.5h	6.5h	7.5h	8.5h		26	23	21				Time	Conductivity(	0.5	28.5667	1.3046	36.6667	0.7686
control	23.3333	28.5667	36.5	37.8	38.0667	38.2	38.8333	38.9333	39.6	39.5667		31	20	22				h	%	1.5	36.5	1.4606	45.1667	0.7952
Process	24.3333	36.6667	45.1667	47.3333	48.0667	48.7	49.3	49.5333	50.2	50.0667										2.5	37.8	1.6811	47.3333	0.8959
												29.4	28.3	28						3.5	38.0667	2.0851	48.0667	1.1752
												37	36	37						4.5	38.2	1.784	48.7	0.9994
CK	26	29.4	37.9	39.5	39.5	36.5	37.4	38.9	39.1	39.4										5.5	38.8333	2.0781	49.3	1.2221
	23	28.3	36.4	37.4	37	38.3	38.9	36.6	37.7	39.6		37.9	36.4	35.2						6.5	38.9333	2.7099	49.5333	1.6741
	21	28	35.2	36.5	37.7	39.8	40.2	41.3	42	39.7		45.8	44.6	45.1						7.5	39.6	3.3194	50.2	1.889
	23.3333	28.5667	36.5	37.8	38.0667	38.2	38.8333	38.9333	39.6	39.5667										8.5	39.5667	0.5151	50.0667	0.2906
												39.5	37.4	36.5
Process	31	37	45.8	48.3	49.3	49.7	49.9	49.2	50.2	51		48.3	46.6	47.1
	20	36	44.6	46.6	46.8	47.6	48.2	49.5	49.8	50.2
	22	37	45.1	47.1	48.1	48.8	49.8	49.9	50.6	49		39.5	37	37.7
	24.3333	36.6667	45.1667	47.3333	48.0667	48.7	49.3	49.5333	50.2	50.0667		49.3	46.8	48.1
standard deviation	2.6324	1.3046	1.4606	1.6811	2.0851	1.784	2.0781	2.7099	3.3194	0.5151
	6.3283	0.5877	2.6017	0.8885	1.5099	1.399	1.9244	2.0442	0.6226	1.0419
standard deviation	1.5125	0.7686	0.7952	0.8959	1.1752	0.9994	1.2221	1.6741	1.889	0.2906
	3.5453	0.3397	1.5954	0.513	0.9236	0.8055	1.1693	1.1961	0.3595	0.6015
	Aa	Aa	Aa	Aa	Aa	Aa	Aa	Aa	Aa	Aa
	Aa	Bb	Ab	Bb	Ab	Bb	Ab	Ab	Ab	Bb
protein content
	repeat-1	repaet-2	repeat-3
blake	0.384			A			value			average
CK-0	1.161	1.21	1.182	0.777	0.826	0.798	0.27503	0.292219	0.282397	0.283215			0	3	6	12	24
Process-0	1.197	1.178	1.161	0.813	0.794	0.777	0.287659	0.280993	0.27503	0.281227		control	0.283215	0.286372	0.29257	0.306134	0.316191		0.27503	0.298884	0.298534	0.308707	0.31432
												Process	0.281227	0.278772	0.270469	0.266727	0.263804		0.292219	0.282397	0.291167	0.298534	0.324844
CK-3	1.229	1.182	1.169	0.845	0.798	0.785	0.298884	0.282397	0.277836	0.286372									0.282397	0.277836	0.28801	0.311163	0.309409
Process-3	1.191	1.151	1.173	0.807	0.767	0.789	0.285554	0.271522	0.279239	0.278772		standard deviation	0.00862	0.01107	0.0054	0.0067	0.00789		0.287659	0.285554	0.27082	0.271873	0.259945
												standard deviation	0.00632	0.00703	0.01035	0.01015	0.00386		0.280993	0.271522	0.280643	0.273276	0.263804
CK-6	1.228	1.207	1.198	0.844	0.823	0.814	0.298534	0.291167	0.28801	0.29257		siq	0.764	0.347	0.031	0.05	0.002		0.27503	0.279239	0.259945	0.255034	0.267663
Process-6	1.149	1.177	1.118	0.765	0.793	0.734	0.27082	0.280643	0.259945	0.270469
CK-12	1.257	1.228	1.264	0.873	0.844	0.88	0.308707	0.298534	0.311163	0.306134
Process-12	1.152	1.156	1.104	0.768	0.772	0.72	0.271873	0.273276	0.255034	0.266727										Time	Protein content		control		Process
																				h	mg/ml	0	0.283215	0.00862	0.281227	0.00632
CK-24	1.273	1.303	1.259	0.889	0.919	0.875	0.31432	0.324844	0.309409	0.316191												3	0.286372	0.01107	0.278772	0.00703
Process-24	1.118	1.129	1.14	0.734	0.745	0.756	0.259945	0.263804	0.267663	0.263804												6	0.29257	0.0054	0.270469	0.01035
																						12	0.306134	0.0067	0.266727	0.01015
																						24	0.316191	0.00789	0.263804	0.00386
SOD
	repeat-1	repaet-2	repeat-3
blank	0.873			Inhibition percentage			value			average
CK-0	0.236	0.242	0.221	72.9668	72.2795	74.685	2.69915	2.60744	2.95023	2.75227
Process-0	0.251	0.217	0.224	71.2486	75.1432	74.3414	2.47809	3.02304	2.89732	2.79948
												2.69915	2.39689	2.60744	2.15162	2.56327
CK-3	0.257	0.227	0.206	70.5613	73.9977	76.4032	2.39689	2.84581	3.23786	2.82686		2.60744	2.84581	2.82895	2.76293	2.05245
Process-3	0.185	0.186	0.167	78.8087	78.6942	80.8706	3.71892	3.69355	4.22754	3.88		2.95023	3.23786	2.86283	3.04167	2.26966
												2.47809	3.71892	3.02304	2.71489	2.57787
CK-6	0.242	0.228	0.226	72.2795	73.8832	74.1123	2.60744	2.82895	2.86283	2.76641		3.02304	3.69355	3.45408	2.9863	2.39689
Process-6	0.217	0.196	0.182	75.1432	77.5487	79.1523	3.02304	3.45408	3.7967	3.42461		2.89732	4.22754	3.7967	2.77922	2.47809
CK-12	0.277	0.232	0.216	68.2703	73.425	75.2577	2.15162	2.76293	3.04167	2.65207
Process-12	0.235	0.219	0.231	73.0813	74.9141	73.5395	2.71489	2.9863	2.77922	2.82681
CK-24	0.245	0.286	0.267	71.9359	67.2394	69.4158	2.56327	2.05245	2.26966	2.29513
Process-24	0.244	0.257	0.251	72.0504	70.5613	71.2486	2.57787	2.39689	2.47809	2.48428
																		control		Process
															Time	SOD	0	2.75227	0.17745	2.79948	0.28535
															h	U/g prot	3	2.82686	0.42081	3.88	0.30125
		0	3	6	12	24											6	2.76641	0.13871	3.42461	0.38767
	control	2.75227	2.82686	2.76641	2.65207	2.29513											12	2.65207	0.45526	2.82681	0.14182
	Process	2.79948	3.88	3.42461	2.82681	2.48428											24	2.29513	0.25636	2.48428	0.09065
	standard deviation	0.17745	0.42081	0.13871	0.45526	0.25636
	standard deviation	0.28535	0.30125	0.38767	0.14182	0.09065
	siq	0.82	0.024	0.05	0.56	0.295
			2.70987
			38.5971
POD
	repeat-1		repeat-2		repeat-3
blank							A			value
CK-0	0.102	0.11	0.059	0.065	0.081	0.089	0.008	0.006	0.008	0.8	0.6	0.8	0.733333		0.8	1	0.8	0.6	0.9
Process-0	0.123	0.13	0.074	0.08	0.162	0.169	0.007	0.006	0.007	0.7	0.6	0.7	0.666667		0.6	0.8	0.7	0.6	0.8
															0.8	1.1	1.5	0.7	1.1
CK-3	0.077	0.087	0.043	0.051	0.056	0.067	0.01	0.008	0.011	1	0.8	1.1	0.966667		0.7	3	1.4	0.9	1.9
Process-3	0.048	0.078	0.044	0.07	0.117	0.145	0.03	0.026	0.028	3	2.6	2.8	2.8		0.6	2.6	1.2	0.8	1.5
															0.7	2.8	1.4	0.9	1.4
CK-6	0.033	0.041	0.051	0.058	0.031	0.046	0.008	0.007	0.015	0.8	0.7	1.5	1
Process-6	0.044	0.058	0.052	0.064	0.144	0.158	0.014	0.012	0.014	1.4	1.2	1.4	1.33333
CK-12	0.079	0.085	0.09	0.096	0.051	0.058	0.006	0.006	0.007	0.6	0.6	0.7	0.633333
Process-12	0.08	0.089	0.078	0.086	0.207	0.216	0.009	0.008	0.009	0.9	0.8	0.9	0.866667
CK-24	0.062	0.071	0.066	0.074	0.051	0.059	0.009	0.008	0.008	0.9	0.8	0.8	0.833333
Process-24	0.04	0.059	0.061	0.076	0.13	0.144	0.019	0.015	0.014	1.9	1.5	1.4	1.6
																	control		Process
				0	3	6	12	24								0	0.733333	0.11547	0.666667	0.05774
			control	0.733333	0.966667	1	0.633333	0.833333						Time	POD	3	0.966667	0.15275	2.8	0.2
			Process	0.666667	2.8	1.33333	0.866667	1.6						h	U/g prot	6	1	0.43589	1.33333	0.11547
																12	0.633333	0.05774	0.866667	0.05774
			standard deviation	0.11547	0.15275	0.43589	0.05774	0.15275								24	0.933333	0.15275	1.6	0.26458
			standard deviation	0.05774	0.2	0.11547	0.05774	0.26458
			siq	0.422	0	0.27	0.008	0.019
					31.8182	36.3636
					320	100
													0.8	0.6	0.8	0.733333
													0.7	0.6	0.7	0.666667
													1	0.8	1.1	0.966667
													3	2.6	2.8	2.8
													0.8	0.7	1.5	1
													1.4	1.2	1.4	1.33333
													0.6	0.6	0.7	0.633333
													0.9	0.8	0.9	0.866667
													0.9	0.8	0.7	0.8
													1.9	1.5	1.4	1.6
CAT
blank	a2	a1	a2	a1	a2	a1	A			value
CK-0	0.102	0.11	0.059	0.065	0.081	0.089	0.008	0.006	0.008	542.4	406.8	542.4
Process-0	0.123	0.13	0.074	0.08	0.162	0.169	0.007	0.006	0.007	474.6	406.8	474.6
										0	0	0
CK-3	0.077	0.087	0.043	0.051	0.056	0.067	0.01	0.008	0.011	678	542.4	745.8
Process-3	0.048	0.078	0.044	0.07	0.117	0.145	0.03	0.026	0.028	2034	1762.8	1898.4
										0	0	0
CK-6	0.033	0.041	0.051	0.058	0.031	0.046	0.008	0.007	0.015	542.4	474.6	1017
Process-6	0.044	0.058	0.052	0.064	0.144	0.158	0.014	0.012	0.014	949.2	813.6	949.2						control		Process
										0	0	0			Time	CAT	0	0.71547	0.00547	0.79774	0.05774
CK-12	0.079	0.085	0.09	0.096	0.051	0.058	0.006	0.006	0.007	406.8	406.8	474.6			h	U/g prot	3	0.7575	0.05275	1.3275	0.12
Process-12	0.08	0.089	0.078	0.086	0.207	0.216	0.009	0.008	0.009	610.2	542.4	610.2					6	0.75589	0.05893	1.21547	0.05547
										0	0	0					12	0.73774	0.05774	0.95774	0.05774
CK-24	0.062	0.071	0.066	0.074	0.051	0.058	0.009	0.008	0.007	610.2	542.4	474.6					24	0.72275	0.05275	0.94458	0.16458
Process-24	0.04	0.059	0.061	0.076	0.13	0.144	0.019	0.015	0.014	1288.2	1017	949.2
				0	3	6	12	24
			control	0.71547	0.7575	0.75589	0.73774	0.72275
			Process	0.79774	1.3275	1.21547	0.95774	0.94458
				0.00547	0.05275	0.05893	0.05774	0.05275
				0.05774	0.12	0.05547	0.05774	0.16458
					66.4076

## Sheet: Sheet2
9.14
H-process-1	24.84	22.61	22.11	20.77	27.71	23.62	23.61
	26.45	23.51	23.28	20.64	22.04	25.47	23.565
	24.91	22.06	20.66	21.54	24.88	23.31	22.8933
	24.53	21.85	26.48	23.05	19.21	17.68	22.1333
H-CK-1	24.07	21.69	25.67	23.74	25.83	23.86	24.1433					23.61	24.1433		24.1433
	31.43	25.1	25.49	25.01	24.73	21.92	25.6133					23.565	25.6133		25.6133
	28.71	25.3	28.69	26.28	27.71	23.72	26.735					22.8933	26.735		26.735
	28.54	24.08	25.42	22.89	24.05	22.72	24.6167					22.1333	24.6167		24.6167
												23.0504	25.2771		23.61
												8.80903			23.565
											standard deviation	0.6937	1.14893		22.8933
9.16											siq	0.016			22.1333
H-CK-1	39.48	37.89	36.95	33.03	38.97	34.95	36.8783					33.4317	36.8783		35.045	36.8783
	42.63	33.61	38.2	32.93	40.13	33.9	36.9					33.5367	36.9		36.9	36.9
	42.23	34.42	39.47	33.73	40.32	37.12	37.8817					34.1	37.8817		34.1	37.8817
	38.88	35.23	37.18	32.21	39.88	36.15	36.5883					31.0083	36.5883		31.0083	36.5883
												33.0192	37.0621		33.4317	33.4317
H-process-1	35.37	30.68	34.62	33.5	34.72	31.7	33.4317								43.5367	33.5367
	42.4	31.29	33.07	32.14	32.72	29.6	33.5367					10.9085			37.8817	34.1
	37.02	34.68	32.31	31.58	35.45	33.56	34.1								34.0883	31.0083
	34.78	30.04	39.77	33.78	24.3	23.38	31.0083				standard deviation	0.565	1.372
											siq	0.002
9.16
X17-process-1	24.57	23.5	24.85	24.32	24.03	24.25	24.88	23.52	26.56	25.45	24.593
	21.4	20.81	20.46	19.39	22.42	22.08	19.57	18.69	21.26	20.58	20.666		24.593	30.017
	24.86	21.59	22.71	21.48	24.3	22.85	17.43	16.28	24.41	22.68	21.859		20.666	32.714
													21.859	32.839
													22.3727	31.8567
X17-CK-1	26.51	24.66	34.72	33.69	31.48	30.44	30.61	29.25	30.19	28.62	30.017
	34.72	31.38	35.27	34.39	35.03	34.28	28.46	27.35	33.45	32.81	32.714		2.01326	1.59442
	36.31	34.08	33.79	32.28	33.42	32.21	34.39	32.65	30.59	28.67	32.839	SIQ	0.003
																45.643
																46.714
																47.142
													38.519	45.643		38.519
X17-无-1	40.05	37.97	40.89	36.05	38.53	37.33	40.01	36.44	41.24	36.68	38.519		35.596	46.714		35.596
	39.06	37.42	36.65	31.31	35.57	32.78	35.22	32.85	38.71	36.39	35.596		35.228	47.142		35.228
	38.75	33.76	36.81	32.46	30.84	28.42	41.86	33.14	42.29	33.95	35.228		36.4477	46.4997
													21.6174
X17-CK-1	46.58	42.74	47.26	42.8	51.83	46.18	48.9	44.19	45.59	40.36	45.643
	49.58	45.72	49.06	45.05	53.09	45.76	41.09	39.41	50.12	48.26	46.714		0.77214	1.803
	51.99	46.16	51.76	47.13	47.55	45.61	43.6	42.2	47.86	47.56	47.142	siq	0.001
		3d	6d	9d
	HMC-control	25.2771	37.0621	51.243			control		process
	HMC-process	23.0504	33.0192	38.8263		6d	31.8567	2.01326	31.8567	1.59442
	XZM-17-control	9	22.3727	46.4997		9d	46.4997	1.803	36.4477	0.77214
	XZM-17-process	9	31.8567	36.4477		3d	25.2771	1.14893	23.0504	0.6937
	standard deviation	1.14893	1.372	1.0253		6d	37.0621	1.372	33.0192	0.565
		0.6937	0.565	0.732
		0	2.01326	1.803
		0	1.59442	0.77214
	HMC-control		HMC-process		XZM-17-control		XZM-17-process
3d	25.2771	1.14893	23.0504	0.6937	9	0	9	0
6d	37.0621	1.372	33.0192	0.565	22.3727	2.01326	31.8567	1.59442
9d	51.243	1.0253	38.8263	0.732	46.4997	1.803	36.4477	0.77214

## Sheet: Sheet3
H-1
CK	54.95	53.09	49.59	53.59	52.77	52.798
process-1	28.03	29.12	29.91	28.88	30.14	29.216
process	33.71	33.35	35.25	31.08	35.48	33.774
process-3	28.76	29.13	27.93	27.17	27.84	28.166
H-3
CK	61.14	60.21	61.59	61.66	62.59	61.438					colony diameter		standard deviation
process-1	20.05	22.03	23.22	22.42	21.52	21.848			H-1	control	52.798	Aa	2.7269	1.2495
process	32.54	31.81	32.6	32.73	33.76	32.688				process	33.774	Bb	1.8274	0.7971
process-3	15.86	17.58	19.21	18.77	19.2	18.124			H-3	control	61.438	Aa	0.8828	0.3983
										process	32.688	Bb	0.8039	0.337
H-5									H-5	control	63.6	Aa	3.1812	1.5534
CK	65.4	63.38	62.79	62.33	64.1	63.6				process	36.328	Bb	2.5939	1.2629			control		H-3-process		H-5-control		H-5-process		H-6-control		H-6-process		H-10-control		H-10-process		1-control		1-process		2-control		2-process
process-1	23.04	22.79	22.82	23.59	23.65	23.178			H-6	control	66.424	Aa	2.7617	1.2691			61.438	0.8828	32.688	0.8039	63.6	3.1812	36.328	2.5939	66.424	2.7617	36.328	0.9543	28.956	0.5172	27.518	1.4611	51.914	2.3445	29.934	1.9025	33.222	4.1112	31.82	1.043
process	35.72	36.67	36.52	35.84	36.89	36.328				process	36.328	Bb	0.9543	0.4243
process-3	22.19	22.22	20.69	21.78	21.87	21.75			H-8	control	45.2525	Aa	1.8163	0.909			control		process
										process	15.1525	Bb	1.4124	0.6614		H-3	61.438	0.8828	32.688	0.8039
H-6									H-10	control	28.956	Aa	0.5172	0.2305		H-5	63.6	3.1812	36.328	2.5939
CK	67.91	63.68	66.5	68.58	65.45	66.424				process	27.518	Aa	1.4611	0.6721		H-6	66.424	2.7617	36.328	0.9543
process-1	36.09	35.79	37.45	36.39	36.76	36.496			1	control	51.914	Aa	2.3445	1.0205		H-10	28.956	0.5172	27.518	1.4611
process	41.96	40.25	41.05	41.58	41.63	41.294				process	29.934	Bb	1.9025	0.858		1	51.914	2.3445	29.934	1.9025
process-3	29.57	29.98	30.32	30.85	28.71	29.886			2	control	33.222	Aa	4.1112	1.8403		2	33.222	4.1112	31.82	1.043
										process	31.82	Aa	1.043	0.4432
H-8
CK	45.97	46.22	45.38	43.44	45.2525
process-1	34.02	34.56	34.48	34.74	34.45
process	14.2	14.76	16.69	14.96	15.1525
process-3	16.6	11.12	13.81	14.26	13.9475
1
CK	50.8	50.74	52.15	53.04	52.84	51.914
process-1	30.59	29.74	29.34	30.81	30.7	30.236															A
process	29.97	30.26	29.02	29.84	30.58	29.934
process-3	15.83	17.92	17	17.41	16.58	16.948
H-10
CK	29.56	28.55	28.27	29.36	29.04	28.956
process-1	21.23	22.91	25.6	22.3	23.42	23.092
process	28.34	27.83	27.11	26.7	27.61	27.518
process-3	20.26	21.05	21.93	21.19	20.85	21.056
2
CK	38.15	31.13	30.91	30.36	35.56	33.222
process-1	28.82	28.49	29.81	29.29	29.8	29.242
process	30.83	32.65	32.98	31.65	30.99	31.82				H-3	H-5	H-6	H-10	1	2
process-3	26.89	27.02	26.18	25.77	26.92	26.556			control	61.438	63.6	66.424	28.956	51.914	33.222
									process	32.688	36.328	34.508	27.518	29.934	31.82
										0.8828	3.1812	2.7617	0.5172	2.3445	4.1112
										0.8039	2.5939	0.9543	1.4611	1.9025	1.043
										Aa	Aa	Aa	Aa	Aa	Aa
										Bb	Bb	Bb	Aa	Bb	Aa
