# Supplementary material for: Study on the inhibitory mechanism of fig leaf extract against postharvest Fusarium in melon
Source: PeerJ. 2024 Jul 25;12:e17654. doi: 10.7717/peerj.17654 (PMC11283778; doi:10.7717/peerj.17654)
Supplement: Supplemental Information 2 [file peerj-12-17654-s002.xlsx]

## Sheet: Sheet1
Index	Q1 (Da)	Q3 (Da)	Molecular weight (Da)	Formula	Ionization model	Compounds	Class I	Class II	CAS	Level	whgy-1	whgy-2	whgy-3	QC01	QC02	QC03	cpd_ID	kegg_map
Wcgp011192	249.18	193.12	248.178	C16H24O2	[M+H]+	5-Hydroxy-8,8-dimethyl-1,3,4,4a,4b,5,6,7,8a,9-decahydrophenanthren-2-one	Others	Others	-	1	6.13328e+06	6.12071e+06	5.89282e+06	6.3836e+06	6.39066e+06	6.38151e+06	-	-
Lmwn004382	483.114	177.02	484.122	C21H24O13	[M-H]-	β-(3-Hydroxy-4,5-dimethoxyphenyl)-O-(6'-O-galloyl)-glucopyranoside	Phenolic acids	Phenolic acids	-	1	5.4703e+06	5.29074e+06	4.85586e+06	4.67989e+06	4.67238e+06	4.66947e+06	-	-
pmn001689	311.223	223.172	312.23	C18H32O4	[M-H]-	9-Hydroxy-12-oxo-15(Z)-octadecenoic acid*	Lipids	Free fatty acids	-	2	1.87973e+06	1.96358e+06	1.9469e+06	1.46901e+06	1.46672e+06	1.46533e+06	C21924	ko00592,ko01110
MWSslk132	285.21	223.21	286.214	C16H30O4	[M-H]-	Hexadecanedioic acid	Lipids	Free fatty acids	505-54-4	1	1.07668e+06	1.02654e+06	1.11985e+06	810500	813180	811386	C19615	ko00073,ko01100
mws0237	187.1	125.1	188.105	C9H16O4	[M-H]-	Azelaic acid	Organic acids	Organic acids	123-99-9	1	809003	812566	791276	747025	749534	749314	C08261	-
Hmqn002118	161.02	133.03	162.032	C9H6O3	[M-H]-	7-Hydroxycoumarin;Umbelliferone	Lignans and Coumarins	Coumarins	93-35-6	1	612913	565413	646478	506997	505402	507711	C09315	ko00999,ko01110
MWS2070	179.072	92.0265	180.079	C10H12O3	[M-H]-	Propyl 4-hydroxybenzoate	Phenolic acids	Phenolic acids	94-13-3	3	52735.3	49490.3	43215.9	59194.3	58893.9	59058.4	-	-
MW0104699	176.09	84.04	175.084	C7H13NO4	[M+H]+	Spermidic acid	Organic acids	Organic acids	4386-03-2	3	1.50995e+06	1.45267e+06	1.50771e+06	1.27504e+06	1.27829e+06	1.27149e+06	-	-
Yacp000453	116.07	70.06	115.063	C5H9NO2	[M+H]+	3-hydroxy-1-methylpyrrolidin-2-one*	Alkaloids	Pyrrole alkaloids	132996-63-5	1	1.48778e+07	1.44032e+07	1.48139e+07	1.32452e+07	1.31532e+07	1.31833e+07	-	-
MWSmce448	127.05	81.04	126.043	C5H6N2O2	[M+H]+	Imidazol-1-yl-acetic acid*	Alkaloids	Alkaloids	22884-10-2	3	5.20991e+06	5.26606e+06	5.48838e+06	5.39213e+06	5.38653e+06	5.3548e+06	-	-
MWSmce118	127.05	81.04	126.043	C5H6N2O2	[M+H]+	Imidazole-4-Acetic Acid*	Alkaloids	Alkaloids	645-65-8	3	5.20991e+06	5.26606e+06	5.48838e+06	5.39213e+06	5.38653e+06	5.3548e+06	C02835	ko00340,ko01100
pmf0314	289.254	157.159	290.261	C20H34O	[M-H]-	cis-Abienol	Terpenoids	Ditepenoids	17990-16-8	3	78365.9	76629.9	78505.9	78560	78906.4	79173.5	-	-
Lhhp120823	193.08	105.07	192.079	C11H12O3	[M+H]+	Eugenyl formate	Others	Others	-	1	1.88804e+06	1.4524e+06	1.46713e+06	1.69143e+06	1.69774e+06	1.68388e+06	-	-
Zmgn000173	149.05	75.01	150.053	C5H10O5	[M-H]-	D-Ribose	Others	Saccharides	50-69-1	1	315822	351765	351693	290260	290216	288094	C00121	ko00030,ko01100,ko02010
pmn001694	329.23	229.15	330.241	C18H34O5	[M-H]-	9,10,13-Trihydroxy-11-Octadecenoic Acid	Lipids	Free fatty acids	29907-57-1	1	1.81108e+07	1.63797e+07	1.79102e+07	1.57101e+07	1.56042e+07	1.55852e+07	C14835	ko00591
Lmtn002324	431.15	269.1	432.163	C19H28O11	[M-H]-	Benzyl-(2''-O-glucosyl)glucoside*	Phenolic acids	Phenolic acids	-	1	217428	208543	227374	250634	250205	252394	C17564	-
MWSmce339	177.056	133.066	178.063	C10H10O3	[M-H]-	2-Methoxycinnamic acid	Phenolic acids	Phenolic acids	6099-03-2	3	121581	121860	129446	94080.8	93499.9	93204.4	-	-
mws0177	111.009	67.0189	112.016	C5H4O3	[M-H]-	2-Furoic acid	Organic acids	Organic acids	88-14-2	3	476948	418264	450886	434094	430951	434936	C01546	ko01100
MWSmce466	135.046	92.0293	136.052	C8H8O2	[M-H]-	4-Hydroxyacetophenone*	Others	Ketone compounds	99-93-4	3	2.28771e+06	1.9805e+06	2.20891e+06	1.95494e+06	1.9685e+06	1.97457e+06	C10700	ko01100
Wayn002083	326.12	164.07	327.131	C15H21NO7	[M-H]-	N-(1-Deoxy-1-fructosyl)Phenylalanine	Nucleotides and derivatives	Nucleotides and derivatives	-	1	4.0023e+06	4.47705e+06	5.25925e+06	3.64956e+06	3.62055e+06	3.66166e+06	-	-
MWS4301	151.041	107.05	152.047	C8H8O3	[M-H]-	3-hydroxyphenylacetic acid*	Phenolic acids	Phenolic acids	621-37-4	3	126917	147303	129956	133890	133176	132070	C05593	ko00350,ko00360,ko01100
Zmyn004676	293.21	113.1	294.219	C18H30O3	[M-H]-	17-Hydroxylinolenic acid	Lipids	Free fatty acids	-	2	7.94109e+06	7.93173e+06	8.55987e+06	5.38952e+06	5.38755e+06	5.45458e+06	C16346	ko00592
mws0256	118.09	72.08	117.079	C5H11NO2	[M+H]+	L-Valine	Amino acids and derivatives	Amino acids and derivatives	72-18-4	1	8.71839e+06	7.7802e+06	8.35768e+06	7.27232e+06	7.30138e+06	7.37493e+06	C00183	ko00280,ko00290,ko00311,ko00460,ko00770,ko00966,ko00970,ko01100,ko01110,ko01210,ko01230,ko01240,ko02010
mws0474	229.14	211.13	230.152	C12H22O4	[M-H]-	Dodecanedioic aicd	Lipids	Free fatty acids	693-23-2	1	131005	120689	136517	114973	113746	113357	C02678	-
pme2710	211.134	167.144	212.141	C12H20O3	[M-H]-	Dihydrojasmonic acid	Organic acids	Organic acids	3572-64-3	3	900963	956638	917669	1.01649e+06	1.02967e+06	1.03012e+06	-	-
mws1628	283.025	239.035	284.032	C15H8O6	[M-H]-	Rheic Acid	Quinones	Anthraquinone	478-43-3	3	270058	256957	258363	237398	235296	233791	C10401	-
Hmcn001415	387.13	225.07	388.137	C17H24O10	[M-H]-	Majoroside	Terpenoids	Monoterpenoids	134140-02-6	1	1.00529e+06	895644	1.02477e+06	843555	848486	856937	-	-
mws0736	189.123	86.0964	188.116	C8H16N2O3	[M+H]+	N-Glycyl-L-leucine*	Amino acids and derivatives	Amino acids and derivatives	869-19-2	1	1.76076e+06	1.61121e+06	1.61616e+06	1.60392e+06	1.58439e+06	1.58012e+06	C02155	-
MWS201389	261.12	136.04	260.112	C9H16N4O5	[M+H]+	Asn-Gln	Amino acids and derivatives	Amino acids and derivatives	14608-83-4	3	37915.5	51940.5	35709.7	60774.5	61563.5	61724.9	-	-
Sazp001763	357.12	195.07	358.126	C16H22O9	[M-H]-	4-Hydroxyphenyl 6-O-(2-Methyl-3-Hydroxypropionyl)-Beta-D-Galactopyranoside	Phenolic acids	Phenolic acids	-	1	1.18088e+06	1.1323e+06	1.09019e+06	986539	997034	1.00308e+06	-	-
ML10172161	103.004	59.0136	104.011	C3H4O4	[M-H]-	Hydroxypyruvic acid*	Organic acids	Organic acids	1113-60-6	1	1.17554e+07	1.31236e+07	1.19119e+07	1.75457e+07	1.73514e+07	1.76407e+07	C00168	ko00260,ko00630,ko01100,ko01110,ko01200
pme3967	312.13	180.088	311.123	C12H17N5O5	[M+H]+	2-(Dimethylamino)guanosine*	Nucleotides and derivatives	Nucleotides and derivatives	2140-67-2	3	55015	533720	488758	452431	444882	449042	-	-
Zmln000899	343.11	181.05	344.111	C15H20O9	[M-H]-	Syringaldehyde-4-O-glucoside	Others	Aldehyde compounds	-	1	671256	495021	590923	594846	585018	592183	-	-
mws0260	175.12	116.07	174.112	C6H14N4O2	[M+H]+	L-Arginine	Amino acids and derivatives	Amino acids and derivatives	74-79-3	1	1.73428e+07	1.45569e+07	1.89672e+07	1.63794e+07	1.63624e+07	1.66208e+07	C00062	ko00220,ko00261,ko00330,ko00470,ko00970,ko01100,ko01110,ko01230,ko02010
Zmpn003368	293.214	195.139	294.219	C18H30O3	[M-H]-	13S-Hydroxy-9Z,11E,15Z-octadecatrienoic acid	Lipids	Free fatty acids	87984-82-5	3	3.09601e+07	2.86685e+07	3.1212e+07	2.33664e+07	2.36834e+07	2.32763e+07	C16316	ko00592
MWS20185	295.19	137.06	294.183	C17H26O4	[M+H]+	[6]-Gingerol	Phenolic acids	Phenolic acids	23513-14-6	2	3.26465e+06	2.91569e+06	3.30202e+06	2.65968e+06	2.64642e+06	2.69424e+06	C10462	ko00945,ko01110
mws0376	115	71.01	116.011	C4H4O4	[M-H]-	Fumaric acid	Organic acids	Organic acids	110-17-8	1	5.50357e+07	5.132e+07	5.39209e+07	4.7327e+07	4.79409e+07	4.81917e+07	C00122	ko00020,ko00190,ko00220,ko00250,ko00350,ko00360,ko00620,ko00650,ko00760,ko01100,ko01110,ko01200
Lmbn005287	311.22	249.22	312.23	C18H32O4	[M-H]-	7S,8S-DiHODE; (9Z,12Z)-(7S,8S)-Dihydroxyoctadeca-9,12-dienoic acid*	Lipids	Free fatty acids	143288-65-7	1	420522	396382	430101	286659	281378	284655	C07354	ko00591
MWS80007	311.22	249.22	312.23	C18H32O4	[M-H]-	13-Hydroperoxy-9Z,11E-octadecadienoic acid*	Lipids	Free fatty acids	23017-93-8	1	420522	396382	430101	286659	281378	284655	-	-
MWS0811	130.09	84.08	129.079	C6H11NO2	[M+H]+	L-Pipecolic Acid	Organic acids	Organic acids	3105-95-1	1	6.43234e+06	5.77006e+06	6.40173e+06	5.68813e+06	5.6514e+06	5.58366e+06	C00408	ko00310,ko00960,ko01100,ko01110
Hmqp005411	297.24	81.07	296.235	C18H32O3	[M+H]+	9-Oxo-12Z-Octadecenoic acid*	Lipids	Free fatty acids	112543-32-5	3	284812	316536	314812	176226	173363	176286	-	-
NK10251888	203.15	70.0653	202.143	C8H18N4O2	[M+H]+	NG,NG-Dimethyl-L-arginine*	Amino acids and derivatives	Amino acids and derivatives	30315-93-6	3	4.09398e+06	4.42677e+06	4.33302e+06	3.93803e+06	3.8814e+06	3.86583e+06	C03626	-
MWS1787	94.0651	53.0383	93.0578	C6H7N	[M+H]+	2-Picoline; 2-Methylpyridine	Alkaloids	Pyridine alkaloids	109-06-8	3	1.20276e+07	1.176e+07	1.11926e+07	1.05864e+07	1.05367e+07	1.03799e+07	C14447	-
Wbtp009573	329.1	273.04	328.095	C18H16O6	[M+H]+	1,3,7,8-tetrahydroxy-2-prenylxanthone	Flavonoids	Other Flavonoids	-	3	3943.82	2203.26	5026.02	2.08848e+06	2.10702e+06	2.0635e+06	-	-
MW0005470	189.02	161.02	190.027	C10H6O4	[M-H]-	5,8-Dihydroxy-1,4-naphthoquinone	Quinones	Quinones	-	3	1.05886e+07	1.02536e+07	1.07946e+07	9.18041e+06	9.31914e+06	9.13185e+06	-	-
Wbmp002283	146.06	118.06	145.053	C9H7NO	[M+H]+	Α-hydroxyquinoline	Alkaloids	Alkaloids	-	2	1.49509e+07	1.35485e+07	1.3134e+07	1.03461e+07	10533002	1.0556e+07	-	-
MWSmce265	247.09	229.09	246.089	C14H14O4	[M+H]+	Decursinol	Lignans and Coumarins	Coumarins	23458-02-8	3	4.06438e+06	3.82769e+06	4.2442e+06	3.49441e+06	3.42448e+06	3.43393e+06	C09259	-
Ymjm000116	313.09	151.04	314.1	C14H18O8	[M-H]-	6-O-Acetylarbutin	Phenolic acids	Phenolic acids	10338-88-2	1	814093	659043	792054	734224	734345	720334	-	-
mws2184	207.07	135.04	208.074	C11H12O4	[M-H]-	Ethyl caffeate	Phenolic acids	Phenolic acids	102-37-4	1	673435	592586	752763	314142	320855	315573	-	-
Hmsp003093	179.03	77.04	178.027	C9H6O4	[M+H]+	3,7-Dihydroxychromen-4-one	Others	Chromone	-	2	7.65109e+06	7.23302e+06	7.9461e+06	6.74378e+06	6.8807e+06	6.87292e+06	-	-
pmp001110	535.14	517.13	534.137	C25H26O13	[M+H]+	Apigenin-6-C-xyloside-8-C-arabinoside	Flavonoids	Flavones	-	1	7.15573e+06	5.98079e+06	7.35941e+06	5.07202e+06	5.1599e+06	5.05063e+06	-	-
pme1651	176.071	130.065	175.063	C10H9NO2	[M+H]+	Indole-3-acetic acid (IAA)	Alkaloids	Plumerane	87-51-4	3	220804	199458	197849	172807	172927	176301	C00954	ko00380,ko01100,ko04075
pme3033	104.07	58.07	103.063	C4H9NO2	[M+H]+	N,N-Dimethylglycine*	Amino acids and derivatives	Amino acids and derivatives	1118-68-9	3	1.37147e+07	1.45279e+07	1.61097e+07	1.47156e+07	1.50508e+07	1.49423e+07	C01026	ko00260,ko01100
MWS00204g	104.07	58.07	103.063	C4H9NO2	[M+H]+	N-Ethylglycine*	Amino acids and derivatives	Amino acids and derivatives	627-01-0	3	1.37147e+07	1.45279e+07	1.61097e+07	1.47156e+07	1.50508e+07	1.49423e+07	-	-
MWS1844	203.143	129.069	202.136	C14H18O	[M+H]+	2-Pentyl-3-phenyl-2-propenal	Others	Aldehyde compounds	122-40-7	3	676473	782408	745657	833109	842144	822686	C12288	-
mws4176	237.123	120.088	236.116	C12H16N2O3	[M+H]+	L-Alanyl-L-Phenylalanine	Amino acids and derivatives	Amino acids and derivatives	3061-90-3	3	549827	526191	594756	507329	495825	499369	-	-
MW0013392	272.26	230.25	271.251	C16H33NO2	[M+H]+	2-Aminohexadecanoic acid	Organic acids	Organic acids	7769-79-1	3	673870	529833	660881	607524	622071	615096	-	-
Zmdn001564	293.11	164.07	294.122	C14H18N2O5	[M-H]-	γ-Glutamylphenylalanine	Amino acids and derivatives	Amino acids and derivatives	7432-24-8	2	976126	926669	994716	854118	861461	874315	-	-
pmb0855	496.34	184.07	495.332	C24H50NO7P	[M+H]+	LysoPC 16:0	Lipids	LPC	17364-16-8	1	6.42661e+06	6.81641e+06	7.59584e+06	686795	678662	695049	-	-
MWS0933	170.092	124.087	169.085	C7H11N3O2	[M+H]+	1-Methylhistidine*	Amino acids and derivatives	Amino acids and derivatives	332-80-9	3	403572	352060	396784	348940	345982	340795	-	-
Lmbn000193	103	59.01	104.011	C3H4O4	[M-H]-	Tartronate semialdehyde*	Organic acids	Organic acids	2480-77-5	1	1.25358e+07	1.40366e+07	1.2681e+07	1.79905e+07	1.78519e+07	1.82753e+07	C01146	ko00053,ko00630,ko01100
MWS1962	153.127	83.0474	152.12	C10H16O	[M+H]+	cis-Citral	Organic acids	Organic acids	5392-40-5	3	290734	385382	440586	436849	430661	426492	C09847	ko01110
Zmhn000892	301.09	139.05	302.1	C13H18O8	[M-H]-	4-O-Glucosyl-3,4-dihydroxybenzyl alcohol	Phenolic acids	Phenolic acids	-	1	1.3428e+07	1.33846e+07	1.39658e+07	1.22193e+07	1.19357e+07	1.20126e+07	-	-
Lmsn012627	469.33	423.33	470.34	C30H46O4	[M-H]-	2,3-Dihydroxyurs-12,18-dien-28-oic acid*	Terpenoids	Triterpene	-	3	12121.7	11572.3	12126.6	5009.35	4890.33	4928.93	-	-
mws2367	299.11	119.05	300.121	C14H20O7	[M-H]-	Salidroside	Phenolic acids	Phenolic acids	10338-51-9	2	717022	661111	635432	627260	635370	642911	C06046	ko00350,ko01100
Zmyn004548	291.2	235.17	292.204	C18H28O3	[M-H]-	12-Oxo-phytodienoic acid	Lipids	Free fatty acids	85551-10-6	3	1.19675e+06	1.15195e+06	1.15495e+06	844182	858582	838202	C01226	ko00592,ko01100,ko01110
mws0344	165.04	75.01	166.048	C5H10O6	[M-H]-	D-Xylonic acid	Others	Saccharides	526-91-0	1	1.98992e+07	2.14077e+07	18189322	1.97465e+07	1.98453e+07	2.02152e+07	C00502	ko00040,ko01100
MW0150283	537.23	475.24	536.223	C23H32N6O9	[M+H]+	Gly-Ala-Asn-Phe-Glu	Amino acids and derivatives	Amino acids and derivatives	-	3	1.38372e+06	1.45238e+06	1.44036e+06	1.09855e+06	1.12174e+06	1.09741e+06	-	-
Zahp013600	282.28	69.07	281.272	C18H35NO	[M+H]+	octadec-2-enamide	Alkaloids	Alkaloids	-	1	1.03759e+06	497056	917065	4.08609e+06	3.9969e+06	4.00107e+06	-	-
MWS1840	102.13	58.07	101.12	C6H15N	[M+H]+	Triethylamine	Alkaloids	Alkaloids	121-44-8	1	1.3788e+07	8.14379e+06	9.58711e+06	1.40493e+07	1.3722e+07	1.39886e+07	C14691	-
mws1417	160.04	116.051	161.048	C9H7NO2	[M-H]-	Indole-3-carboxylic acid*	Alkaloids	Plumerane	771-50-6	3	1.78545e+06	1.57398e+06	1.75965e+06	1.42873e+06	1.44558e+06	1.40974e+06	C19837	-
MWSslk011	189.05	161.06	188.047	C11H8O3	[M+H]+	2-Methoxy-1,4-naphthoquinone	Quinones	Quinones	2348-82-5	3	2.93343e+06	3.02018e+06	2.89788e+06	2.55261e+06	2.58288e+06	2.51852e+06	-	-
Lamp000484	116.07	70.06	115.063	C5H9NO2	[M+H]+	4-Methylazetidine-2-Carboxylic acid*	Alkaloids	Alkaloids	1779725-63-1	1	1.4788e+07	1.44297e+07	1.39487e+07	1.35524e+07	1.34646e+07	1.32239e+07	-	-
MW0105065	217.11	171.1	218.115	C10H18O5	[M-H]-	3-Hydroxydecanedioic acid	Organic acids	Organic acids	73141-46-5	3	1.10411e+06	1.02628e+06	1.13555e+06	1.02219e+06	1.00689e+06	996549	-	-
MWSmce274	123.049	93.0376	124.052	C7H8O2	[M-H]-	Salicyl Alcohol	Phenolic acids	Phenolic acids	90-01-7	3	279003	283354	289840	239194	239617	234096	C02323	-
mws0889	135.03	75.01	136.037	C4H8O5	[M-H]-	D-Threonic Acid	Others	Saccharides	3909-12-4	1	7.08812e+06	6.98334e+06	7.46408e+06	6.66194e+06	6.79354e+06	6.82777e+06	C21649	-
Lhlp120627	195.14	67.05	194.131	C12H18O2	[M+H]+	Carvylacetate	Terpenoids	Monoterpenoids	97-42-7	1	3.14933e+06	2.88681e+06	2.97691e+06	2.59391e+06	2.63131e+06	2.56231e+06	-	-
mws0275	133.01	71.01	134.022	C4H6O5	[M-H]-	L-Malic acid	Organic acids	Organic acids	97-67-6	1	1.84612e+06	1.74667e+06	1.68939e+06	1.44254e+06	1.48117e+06	1.45729e+06	C00149	ko00020,ko00620,ko00630,ko00710,ko01100,ko01110,ko01200
MWS80006	311.22	293.21	312.23	C18H32O4	[M-H]-	9-Hydroperoxy-9Z,11E-Octadecadienoic Acid	Lipids	Free fatty acids	-	2	249955	239655	258077	177362	178230	181869	-	-
Wasn000495	311.1	89.02	312.106	C11H20O10	[M-H]-	6-O-alpha-L-arabinopyranosyl-D-glucopyranose	Others	Saccharides	14116-69-9	3	1.86926e+06	2.04457e+06	2.35475e+06	1.90634e+06	1.86426e+06	1.86081e+06	C01625	-
MWStz070	182.08	91.05	181.074	C9H11NO3	[M+H]+	N-(2-Hydroxy-4-methoxyphenyl)acetamide	Alkaloids	Phenolamine	58469-06-0	1	9.81491e+06	9.93844e+06	1.04646e+07	8.37305e+06	8.50731e+06	8.28113e+06	-	-
Rfmb320	144.102	84.0813	143.095	C7H13NO2	[M+H]+	1-Methylpiperidine-2-carboxylic acid*	Organic acids	Organic acids	7730-87-2	3	1.23879e+06	1.09433e+06	1.19416e+06	1.19846e+06	1.20215e+06	1.22855e+06	-	-
mws2104	193.072	59.0139	194.079	C7H14O6	[M-H]-	D-Pinitol	Others	Saccharides	10284-63-6	3	714776	688152	663537	678289	660017	670135	C03844	-
Zbdn001947	301.09	123.01	302.1	C13H18O8	[M-H]-	Isotachioside	Phenolic acids	Phenolic acids	31427-08-4	2	1.34322e+06	574632	1.36976e+06	1.19727e+06	1.18638e+06	1.21886e+06	-	-
MW0009489	187.04	130.04	188.047	C11H8O3	[M-H]-	Plumbagin	Quinones	Quinones	481-42-5	3	9.51375e+06	8.58022e+06	8.78496e+06	7.59138e+06	7.79422e+06	7.74847e+06	-	-
Lmln001195	297.098	135.065	298.105	C14H18O7	[M-H]-	Picein (4-Acetylphenyl-glucoside)	Phenolic acids	Phenolic acids	530-14-3	3	449496	409523	403927	368551	378444	376095	C10720	-
mws1050	148.06	88.0393	147.053	C5H9NO4	[M+H]+	O-Acetylserine	Amino acids and derivatives	Amino acids and derivatives	5147-00-2	3	507639	507018	574944	525386	513860	527279	C00979	ko00270,ko00908,ko00920,ko01100,ko01110,ko01200,ko01230,ko04122
pma0134	121.049	93.0575	120.042	C4H8O4	[M+H]+	D-Threose	Others	Saccharides	95-43-2	3	9.06692e+06	8.1477e+06	9.7076e+06	7.37497e+06	7.5779e+06	7.43597e+06	C06463	-
MWSmce585	104.07	59.01	103.063	C4H9NO2	[M+H]+	Methyl 3-aminopropanoate	Amino acids and derivatives	Amino acids and derivatives	4138-35-6	3	1.18924e+07	1.16838e+07	1.09231e+07	1.11779e+07	1.08816e+07	1.09494e+07	-	-
Lmbn004685	311.22	223.17	312.23	C18H32O4	[M-H]-	5S,8R-DiHODE; (5S,8R,9Z,12Z)-5,8-Dihydroxyoctadeca-9,12-dienoate	Lipids	Free fatty acids	-	2	1.12551e+06	1.28326e+06	1.36652e+06	1.08956e+06	1.09856e+06	1.11989e+06	C20186	ko00591
pme1654	209.119	59.0151	210.126	C12H18O3	[M-H]-	Jasmonic acid	Organic acids	Organic acids	77026-92-7	3	3.05115e+06	2.75384e+06	3.01783e+06	2.52033e+06	2.45001e+06	2.49062e+06	C08491	ko00592,ko01100,ko01110,ko04075
MW0123471	337.16	215.03	336.147	C20H20N2O3	[M+H]+	9H-Pyrrolo[1',2':2,3]isoindolo[4,5,6-cd]indol-9-one, 10-acetyl-2,6,6a,7,11a,11b-hexahydro-11-hydroxy-7,7-dimethyl-, (6aR,11aS,11bR)-	Organic acids	Organic acids	-	3	2.19773e+06	2.13376e+06	2.2104e+06	1.57417e+06	1.6073e+06	1.56413e+06	-	-
MW0144694	519.32	357.26	520.312	C24H40N8O5	[M-H]-	Ala-Phe-Lys-Arg	Amino acids and derivatives	Amino acids and derivatives	-	3	172868	123675	192035	133812	137644	135247	-	-
Zmcp002924	611.161	287.055	611.161	C27H31O16+	[M]+	Cyanidin-3-O-(2''-O-glucosyl)glucoside	Flavonoids	Anthocyanidins	38820-68-7	3	537116	834317	693883	583411	578394	567155	C16306	ko00942
MWS3166	312.255	74.0256	313.262	C18H35NO3	[M-H]-	N-Palmitoylglycine	Amino acids and derivatives	Amino acids and derivatives	2441-41-0	3	29343.4	24651.1	28136.4	24628	25107.5	25356.7	-	-
Zmgn002106	206.08	58.03	207.089	C11H13NO3	[M-H]-	N-Acetyl-L-phenylalanine	Amino acids and derivatives	Amino acids and derivatives	2018-61-3	1	8.62627e+06	8.59265e+06	9.08881e+06	7.44669e+06	7.27539e+06	7.2448e+06	C03519	ko00360,ko01100
Lmbn001467	158.082	116.072	159.089	C7H13NO3	[M-H]-	5-Acetamidopentanoic Acid	Organic acids	Organic acids	1072-10-2	3	388066	333793	374995	325105	331307	321702	C03087	ko00310,ko01100
Lmbn000198	133.01	71.01	134.022	C4H6O5	[M-H]-	3-Dehydro-L-Threonic Acid	Others	Saccharides	-	1	4.89487e+07	4.73779e+07	4.83996e+07	3.94254e+07	4.0621e+07	4.00058e+07	C03064	ko00053,ko01100
Wasn003258	293.12	131.07	294.132	C12H22O8	[M-H]-	Glucosyl 2-Hydroxy-4-Methylpentanoic Acid	Organic acids	Organic acids	-	1	2.9046e+06	2.81884e+06	2.78582e+06	2.72583e+06	2.66168e+06	2.6507e+06	-	-
Zmgn000216	125.001	78.96	126.008	C2H7O4P	[M-H]-	2-Hydroxyethylphosphonic acid	Organic acids	Organic acids	22987-21-9	3	2.2149e+06	2.10068e+06	2.19542e+06	1.95211e+06	1.93589e+06	1.99364e+06	C06451	ko00440,ko01100,ko01110
Zmmp002106	120.08	77.04	119.07	C3H9N3O2	[M+H]+	4-methyl-1,5,2,3-dioxadiazinan-2-amine	Nucleotides and derivatives	Nucleotides and derivatives	-	2	1.36957e+07	1.21211e+07	1.30858e+07	1.11176e+07	1.1253e+07	1.14586e+07	-	-
MWSHC20109	147.04	91.06	146.037	C9H6O2	[M+H]+	Coumarin	Lignans and Coumarins	Coumarins	91-64-5	1	2.65881e+07	2.52216e+07	2.49655e+07	2.22638e+07	2.26311e+07	2.19463e+07	C05851	ko00999,ko01110
Hmcn003273	247.13	203.14	248.141	C15H20O3	[M-H]-	Reynosin	Terpenoids	Sesquiterpenoids	28254-53-7	3	60388.6	59949.7	59346.5	50124.5	49381.1	48599.5	-	-
MWSmce698	149.095	65.038	148.089	C10H12O	[M+H]+	2',4'-Dimethylacetophenone	Others	Ketone compounds	89-74-7	3	2.42488e+06	3.01429e+06	2.21743e+06	2.73192e+06	2.81684e+06	2.78704e+06	-	-
MA10014775	109.029	81.0336	110.037	C6H6O2	[M-H]-	Hydroquinone	Phenolic acids	Phenolic acids	123-31-9	3	99546.3	90221.1	79466.7	85337.7	82847.5	83441.9	C00530	ko00350,ko01100
Wcgn012724	281.17	199.17	282.183	C16H26O4	[M-H]-	6-Hydroxyphomodiol	Others	Others	-	1	1.0772e+07	1.30152e+07	1.34011e+07	1.46533e+07	1.50238e+07	1.45965e+07	-	-
MWS201054	162.08	56.05	161.069	C6H11NO4	[M+H]+	O-Acetyl-L-homoserine	Amino acids and derivatives	Amino acids and derivatives	250736-84-6	3	1.60065e+06	1.83198e+06	1.74474e+06	1.52267e+06	1.57075e+06	1.53966e+06	-	-
Lmbn002648	163.04	119.05	164.047	C9H8O3	[M-H]-	α-Hydroxycinnamic Acid*	Phenolic acids	Phenolic acids	5801-57-0	1	3.50793e+07	3.06781e+07	3.26274e+07	2.83802e+07	2.76103e+07	2.76255e+07	C02763	ko00360,ko01100
Wafn011571	295.23	195.14	296.235	C18H32O3	[M-H]-	alpha-Hydroxylinoleic acid*	Lipids	Free fatty acids	57818-44-7	1	2.27966e+07	2.09823e+07	2.1888e+07	1.43109e+07	1.38734e+07	1.40239e+07	-	-
mws0473	131.035	87.0452	132.042	C5H8O4	[M-H]-	2-Methylsuccinic acid*	Organic acids	Organic acids	498-21-5	1	3.41751e+06	3.1248e+06	3.4039e+06	3.09641e+06	3.01419e+06	3.01139e+06	-	-
pmb2591	245.09	203.08	246.1	C13H14N2O3	[M-H]-	N-Acetyl-L-Tryptophan	Amino acids and derivatives	Amino acids and derivatives	1218-34-4	1	1.99156e+06	1.72189e+06	2.15837e+06	1.51173e+06	1.46491e+06	1.48052e+06	-	-
mws0470	117.019	73.0295	118.027	C4H6O4	[M-H]-	Methylmalonic acid*	Organic acids	Organic acids	516-05-2	1	7.83415e+06	6.99748e+06	7.48464e+06	6.63729e+06	6.46243e+06	6.44519e+06	C02170	ko00240,ko00280,ko00640,ko01100
ML10176345	171.03	109.029	172.037	C7H8O5	[M-H]-	3-Dehydroshikimic acid	Organic acids	Organic acids	2922-42-1	3	352796	537958	518843	519372	506071	521855	C02637	ko00400,ko00999,ko01100,ko01110,ko01230,ko01240
pmp000579	463.123	301.07	462.116	C22H22O11	[M+H]+	Diosmetin-7-O-galactoside*	Flavonoids	Flavones	-	2	4.83353e+06	3.59589e+06	5.61987e+06	2.17142e+06	2.22932e+06	2.1624e+06	-	-
MWS1900	215.13	153.13	216.136	C11H20O4	[M-H]-	Undecanedioic acid	Lipids	Free fatty acids	1852-04-6	1	3.66552e+06	3.22883e+06	3.51019e+06	3.00805e+06	3.0251e+06	2.93175e+06	-	-
mws1320	160.077	130.066	161.084	C10H11NO	[M-H]-	Tryptophol	Alkaloids	Plumerane	526-55-6	3	78781.2	74297	91644	54045.3	55864.3	55139.6	C00955	ko00380
pme1286	385.13	250	384.122	C14H20N6O5S	[M+H]+	S-(5'-Adenosy)-L-homocysteine	Amino acids and derivatives	Amino acids and derivatives	979-92-0	1	1.65023e+06	1.56398e+06	1.68394e+06	1.31803e+06	1.28288e+06	1.27883e+06	C00021	ko00270,ko01100,ko01230,ko01240
MWS201384	232.14	70.066	231.133	C8H17N5O3	[M+H]+	Arg-Gly	Amino acids and derivatives	Amino acids and derivatives	108347-93-9	3	1.03947e+06	1.09429e+06	1.20181e+06	1.14641e+06	1.10886e+06	1.12963e+06	-	-
MWS201479	239.103	136.076	238.095	C11H14N2O4	[M+H]+	Tyr-Gly*	Amino acids and derivatives	Amino acids and derivatives	673-08-5	1	832403	761506	945257	766888	751554	776905	-	-
Lakn001671	329.09	123.05	330.095	C14H18O9	[M-H]-	2-β-D-Glucopyranosyloxy-5-hydroxy-phenylacetic acid	Phenolic acids	Phenolic acids	-	3	501970	489803	527089	506792	519761	503722	-	-
pmf0175	157.16	157.16	158.167	C10H22O	[M-H]-	2-Decanol*	Others	Alcohol compounds	1120-06-5	3	220413	242695	269143	690590	699679	714144	-	-
pme3096	118.015	74.0237	119.022	C3H5NO4	[M-H]-	Aminomalonic acid	Organic acids	Organic acids	1068-84-4	3	6.1087e+06	5.71007e+06	5.77313e+06	5.37322e+06	5.36321e+06	5.21251e+06	C00872	-
MWSprf024	247.1	175.03	246.089	C14H14O4	[M+H]+	Columbianetin	Lignans and Coumarins	Coumarins	3804-70-4	3	6.35571e+06	6.21359e+06	6.46861e+06	5.13595e+06	5.30431e+06	5.17397e+06	C19707	ko00999,ko01110
MWS1777	128.03	93.06	127.019	C6H6ClN	[M+H]+	3-Chloroaniline	Alkaloids	Alkaloids	108-42-9	1	1.12189e+07	1.13472e+07	1.07819e+07	9.15784e+06	9.19977e+06	8.91371e+06	-	-
Zmyn002323	151.039	107.05	152.047	C8H8O3	[M-H]-	2-Hydroxyphenylacetic acid	Organic acids	Organic acids	614-75-5	3	327248	257202	323715	304716	294541	298172	C05852	ko00360,ko01100
mws0103	146.06	91.0542	145.053	C9H7NO	[M+H]+	Indole-3-carboxaldehyde	Alkaloids	Plumerane	487-89-8	3	2.08424e+06	1.9706e+06	2.25069e+06	1.62569e+06	1.59297e+06	1.57054e+06	C08493	-
Zmyn000247	147.03	57.03	148.037	C5H8O5	[M-H]-	2-Hydroxyglutaric Acid*	Organic acids	Organic acids	13095-48-2	1	1.21706e+06	1.14921e+06	1.22096e+06	1.06016e+06	1.04259e+06	1.02382e+06	C03196	ko00310,ko01100
Wchn003984	337.1	191.06	338.1	C16H18O8	[M-H]-	Alpha-Hydrojuglone 4-Glucoside	Others	Others	39015-63-9	1	1.58348e+06	1.36892e+06	1.34213e+06	1.35276e+06	1.40006e+06	1.38851e+06	-	-
mws1045	625.141	463.087	626.148	C27H30O17	[M-H]-	Myricetin-3-O-rutinoside	Flavonoids	Flavonols	-	3	302599	310800	310088	251220	255474	260368	-	-
MWSmce275	163.072	107.047	162.068	C10H10O2	[M+H]+	5-Hydroxy-1-tetralone	Others	Ketone compounds	28315-93-7	3	1.45664e+06	1.60464e+06	943524	1.33972e+06	1.31227e+06	1.29227e+06	-	-
pme2746	784.15	437.087	785.157	C27H33N9O15P2	[M-H]-	Riboflavin 5'-Adenosine Diphosphate	Nucleotides and derivatives	Nucleotides and derivatives	146-14-5	3	319596	248853	319922	225104	233407	229608	C00016	ko00740,ko01100,ko01110,ko01240
MW0146099	527.18	225.01	528.182	C20H28N6O11	[M-H]-	Asp-Glu-His-Glu	Amino acids and derivatives	Amino acids and derivatives	-	3	28419.1	23654.6	28681.4	23029.3	22711.5	22213.6	-	-
ML10174588	233.155	233.155	234.162	C15H22O2	[M-H]-	Confertifoline	Terpenoids	Sesquiterpenoids	1811-23-0	3	1.71591e+07	1.9585e+07	1.7371e+07	18214255	1.88768e+07	1.86716e+07	C09376	-
MWS5235	299.26	253.25	300.266	C18H36O3	[M-H]-	12-Hydroxyoctadecanoic acid	Lipids	Free fatty acids	106-14-9	3	54036.6	55588.9	84086.1	55196.1	53936.1	53239	-	-
pmb0608	549.12	301.07	548.117	C25H24O14	[M+H]+	Chrysoeriol-7-O-(6''-malonyl)glucoside	Flavonoids	Flavones	-	1	3.30081e+07	2.16754e+07	3.34078e+07	18112086	1.79921e+07	1.74881e+07	-	-
MWS201478	253.118	120.086	252.111	C12H16N2O4	[M+H]+	Phe-Ser	Amino acids and derivatives	Amino acids and derivatives	16053-39-7	1	542700	581623	575892	464015	447220	457675	-	-
MW0062117	195.14	67.05	172.146	C10H20O2	[M+Na]+	trans-p-Menthane-1,8-diol	Terpenoids	Monoterpenoids	565-50-4	3	3.89703e+06	3.74296e+06	4.07334e+06	3.3633e+06	3.41105e+06	3.48956e+06	-	-
Lmjp003655	463.12	301.08	462.116	C22H22O11	[M+H]+	6-C-MethylKaempferol-3-glucoside*	Flavonoids	Flavones	-	2	5.75919e+06	3.85559e+06	6.00992e+06	2.53385e+06	2.53721e+06	2.45389e+06	-	-
MW0017099	291.2	71.05	292.204	C18H28O3	[M-H]-	9s,13r-12-Oxophytodienoic Acid	Lipids	Free fatty acids	71606-07-0	3	2.6698e+06	2.52332e+06	2.8211e+06	1.85065e+06	1.87445e+06	1.80599e+06	-	-
pmb0631	581.15	515.4	580.143	C26H28O15	[M+H]+	Orientin-6-C-arabinoside	Flavonoids	Flavones	-	3	1.71148e+06	2.05214e+06	1.84423e+06	1.49831e+06	1.44425e+06	1.48433e+06	-	-
Lazn003560	469.17	195.07	470.179	C22H30O11	[M-H]-	Methoxy-erythro-Guaiacyl glycerol β-threo-syringyl glycerol ether	Lignans and Coumarins	Lignans	-	1	1.58993e+06	1.54809e+06	1.61152e+06	1.58608e+06	1.54589e+06	1.52848e+06	-	-
Zahp007439	177.05	149.02	176.047	C10H8O3	[M+H]+	3,4-Methylenedioxycinnamaldehyde	Others	Aldehyde compounds	58095-77-5	1	1.02186e+06	1.41965e+06	964413	1.2297e+06	1.26949e+06	1.22737e+06	-	-
MWSmce295	245.07	113.03	244.07	C9H12N2O6	[M+H]+	1-beta-D-Arabinofuranosyluracil	Nucleotides and derivatives	Nucleotides and derivatives	3083-77-0	2	272961	281182	341618	281796	271439	278628	C16908	-
Lmrj002087	247.13	86.09	246.122	C10H18N2O5	[M+H]+	L-Isoleucyl-L-Aspartate	Amino acids and derivatives	Amino acids and derivatives	-	1	653742	611475	648000	541806	557016	536999	-	-
Jmwn002620	341.09	161.02	342.095	C15H18O9	[M-H]-	Vanillic Acid-4-O-Glucuronide	Phenolic acids	Phenolic acids	-	3	368162	352688	365285	334084	343950	331714	-	-
MW0000731	191.07	127.06	168.079	C9H12O3	[M+Na]+	(4-Hydroxy-3-methoxyphenyl)ethanol	Phenolic acids	Phenolic acids	2380-78-1	3	619687	567826	660552	665197	680684	655135	-	-
mws0924	145.051	101.061	146.058	C6H10O4	[M-H]-	2-Methylglutaric acid*	Organic acids	Organic acids	617-62-9	3	1.88469e+06	1.56699e+06	1.81661e+06	1.8299e+06	1.76418e+06	1.77692e+06	-	-
pmb2791	309.207	209.054	310.214	C18H30O4	[M-H]-	9-Hydroperoxy-10E,12,15Z-octadecatrienoic acid	Lipids	Free fatty acids	111004-08-1	3	6.33198e+06	5.46423e+06	6.03763e+06	4.60821e+06	4.61204e+06	4.45608e+06	C16321	ko00592,ko01110
MWSslk133	257.18	195.18	258.183	C14H26O4	[M-H]-	1,14-Tetradecanedioic Acid	Lipids	Free fatty acids	821-38-5	2	859941	760936	844924	734520	720785	706281	-	-
MWSmce712	165.09	91.0536	164.084	C10H12O2	[M+H]+	Ethyl phenylacetate	Phenolic acids	Phenolic acids	101-97-3	3	339797	219248	336718	847287	868047	835082	-	-
MWSmce362	133.048	87.007	132.042	C5H8O4	[M+H]+	3-Ethoxy-3-oxopropanoic acid*	Organic acids	Organic acids	1071-46-1	1	204112	146243	202122	174286	174324	180310	-	-
Wasn000977	311.1	89.24	312.106	C11H20O10	[M-H]-	4-O-galactopyranosylxylose	Others	Saccharides	14087-31-1	3	1.93824e+06	1.73327e+06	1.77072e+06	1.53082e+06	1.48218e+06	1.53664e+06	-	-
pmb0492	584.275	325	583.268	C34H37N3O6	[M+H]+	N',N'',N'''-p-Coumaroyl-cinnamoyl-caffeoyl spermidine	Alkaloids	Phenolamine	-	3	2.26592e+06	1.77101e+06	2.22874e+06	1.57609e+06	1.63416e+06	1.62795e+06	-	-
MWS1872	225.055	105.033	224.047	C14H8O3	[M+H]+	1-Hydroxyanthraquinone	Quinones	Anthraquinone	129-43-1	3	77156.9	193683	123667	125429	130245	126506	C02980	-
MWS1848	135.045	92.0274	136.052	C8H8O2	[M-H]-	Phenyl acetate*	Phenolic acids	Phenolic acids	122-79-2	3	2.25595e+06	2.16023e+06	2.22087e+06	1.98264e+06	2.02822e+06	2.06348e+06	C00548	-
Zmpn000199	209.03	85.03	210.038	C6H10O8	[M-H]-	D-Galactaric acid*	Others	Saccharides	526-99-8	1	1.4395e+06	1.46074e+06	1.43003e+06	1.33051e+06	1.38e+06	1.37546e+06	C00879	ko00053,ko01100
Lmsn000954	207.09	59.01	208.095	C8H16O6	[M-H]-	Dambonitol	Others	Saccharides	523-94-4	1	1.40258e+06	1.45873e+06	1.65816e+06	1.44377e+06	1.45429e+06	1.49934e+06	-	-
Lmzn001983	375.13	135.05	376.137	C16H24O10	[M-H]-	D-Threo-guaiacylglycerol-7-O-β-D-glucoside	Phenolic acids	Phenolic acids	-	3	182545	169391	161729	155868	159589	153294	-	-
pmb0774	177.102	160.075	176.095	C10H12N2O	[M+H]+	N-Hydroxytryptamine*	Alkaloids	Plumerane	-	1	5.09537e+06	5.15399e+06	5.46836e+06	4.02434e+06	4.076e+06	4.1875e+06	C17203	ko00380,ko01100
MWS4525	166.07	124.05	165.065	C6H7N5O	[M+H]+	6-O-methylguanine	Nucleotides and derivatives	Nucleotides and derivatives	20535-83-5	2	722807	728860	850240	615156	638963	635346	-	-
Lasp003640	183.06	77.04	182.058	C9H10O4	[M+H]+	2,4-Dihydroxy-6-methoxyacetophenone	Others	Ketone compounds	3602-54-8	2	1.72925e+06	1.40977e+06	1.75156e+06	1.3883e+06	1.37062e+06	1.42632e+06	-	-
Hmqn000843	301.09	123.01	302.1	C13H18O8	[M-H]-	Tachioside	Phenolic acids	Phenolic acids	109194-60-7	3	1.4569e+06	1.43762e+06	1.52635e+06	1.39738e+06	1.39721e+06	1.34849e+06	-	-
mws2623	281.25	281.25	282.256	C18H34O2	[M-H]-	11-Octadecanoic acid(Vaccenic acid)	Lipids	Free fatty acids	506-17-2	1	518572	348400	553712	426592	428052	442704	C21944	-
Yamp001634	179.07	91.05	178.063	C10H10O3	[M+H]+	dehydroconiferyl alcohol	Others	Others	-	1	6.88047e+06	5.87612e+06	6.26858e+06	5.36584e+06	5.54127e+06	5.3336e+06	-	-
mws1075	177.05	121.06	176.047	C10H8O3	[M+H]+	7-Methoxycoumarin	Lignans and Coumarins	Coumarins	531-59-9	1	1.45776e+07	1.44244e+07	1.39911e+07	1.12946e+07	1.09863e+07	1.14412e+07	C09268	-
MWS20182	195.07	136.05	196.074	C10H12O4	[M-H]-	Dihydroferulic Acid	Phenolic acids	Phenolic acids	1135-23-5	2	306501	285979	318545	286034	290403	297939	-	-
MWS201415	231.098	70.0659	230.09	C9H14N2O5	[M+H]+	Pro-Asp	Amino acids and derivatives	Amino acids and derivatives	85227-98-1	3	2.81848e+06	2.98115e+06	2.9752e+06	2.85751e+06	2.85717e+06	2.75601e+06	-	-
MWSHC20105	371.11	282.09	372.121	C20H20O7	[M-H]-	4-ketopinoresinol	Lignans and Coumarins	Lignans	66288-89-9	3	88449.2	88640.5	97910.1	57498.9	56886.5	59204.8	-	-
Zmgn004894	151.04	136.017	152.047	C8H8O3	[M-H]-	Methyl 4-hydroxybenzoate*	Phenolic acids	Phenolic acids	99-76-3	3	295740	276348	292813	245696	251572	256130	-	-
MW0151164	439.16	395.17	438.154	C22H22N4O6	[M+H]+	His-HoPhe-OH	Amino acids and derivatives	Amino acids and derivatives	-	3	2.32902e+06	2.37556e+06	2.69894e+06	1.90735e+06	1.9826e+06	1.97201e+06	-	-
Zahn007990	197.12	153.13	198.126	C11H18O3	[M-H]-	5-hydroxy-3,4-dimeth-yl-5-pentylfuran-2(5H)-one	Others	Others	-	1	1.42451e+06	1.34546e+06	1.41138e+06	1.18691e+06	1.15769e+06	1.20707e+06	-	-
pmp000724	166.12	121.06	165.115	C10H15NO	[M+H]+	Pseudoephedrine	Alkaloids	Alkaloids	90-82-4	2	4.40277e+06	4.18324e+06	4.43923e+06	3.83813e+06	3.76489e+06	3.68034e+06	C02765	ko00996,ko01100
pme1173	137.046	110.035	136.038	C5H4N4O	[M+H]+	Allopurinol	Nucleotides and derivatives	Nucleotides and derivatives	315-30-0	3	1.85265e+07	1.55091e+07	1.78687e+07	1.64912e+07	1.58853e+07	1.64629e+07	-	-
pme2550	173.009	129.019	174.016	C6H6O6	[M-H]-	Cis-Aconitic acid	Organic acids	Organic acids	585-84-2	3	600013	704620	660111	602849	620474	628470	C00417	ko00020,ko00630,ko00660,ko01100,ko01110,ko01210
pme0116	227.114	156.077	226.107	C9H14N4O3	[M+H]+	L-Carnosine	Amino acids and derivatives	Amino acids and derivatives	305-84-0	3	73663.2	187839	209787	246122	247398	255944	C00386	ko00340,ko00410,ko01100
mws1292	565.16	409.09	564.148	C26H28O14	[M+H]+	Isoschaftoside	Flavonoids	Flavones	52012-29-0	1	2.9392e+06	3.15601e+06	3.55461e+06	3.09874e+06	2.98459e+06	2.98798e+06	-	-
Hmhp001812	282.12	136.06	281.112	C11H15N5O4	[M+H]+	2'-O-Methyladenosine	Nucleotides and derivatives	Nucleotides and derivatives	2140-79-6	3	539975	436535	517501	419757	434136	417231	-	-
mws0117	181.051	122.037	182.058	C9H10O4	[M-H]-	Homovanillic acid; 4-Hydroxy-3-methoxyphenylacetic acid	Phenolic acids	Phenolic acids	306-08-1	3	265870	210952	223099	230948	222252	230595	C05582	ko00350,ko01100
pmd0130	468.308	184.073	467.301	C22H46NO7P	[M+H]+	LysoPC 14:0	Lipids	LPC	20559-16-4	3	258583	240292	248292	85391.8	82347.6	82182.8	-	-
MWSHC20125	335.08	135.05	336.084	C16H16O8	[M-H]-	5-O-Caffeoylshikimic acid	Phenolic acids	Phenolic acids	73263-62-4	1	4.24633e+06	4.19566e+06	4.21224e+06	3.60822e+06	3.73114e+06	3.58346e+06	-	-
MWS2056	115.075	69.0697	114.068	C6H10O2	[M+H]+	Delta-Hexalactone	Others	Lactones	823-22-3	3	112624	79205.7	116511	101852	100670	97620.9	-	-
Hmln000659	331.07	169.01	332.074	C13H16O10	[M-H]-	3-O-Galloyl-D-glucose*	Phenolic acids	Phenolic acids	-	1	1.44266e+06	1.40043e+06	1.50664e+06	1.22152e+06	1.22725e+06	1.17883e+06	-	-
Lmhp001670	231.17	72.08	230.163	C11H22N2O3	[M+H]+	L-Valyl-L-Leucine	Amino acids and derivatives	Amino acids and derivatives	3989-97-7	2	965920	931014	964675	855348	890447	859920	-	-
Lmap007656	404.126	344.107	403.117	C22H17N3O5	[M+H]+	Azoxystrobin; Amistar	Others	Others	131860-33-8	1	2239.29	1437.87	9	3.48292e+06	3.6099e+06	3.46691e+06	-	-
Lmmn000806	131.035	87.0459	132.042	C5H8O4	[M-H]-	Dimethylmalonic acid*	Organic acids	Organic acids	595-46-0	1	428501	406639	449391	412982	406358	395140	-	-
pmb2786	293.212	235.172	294.219	C18H30O3	[M-H]-	9-Hydroxy-10,12,15-octadecatrienoic acid*	Lipids	Free fatty acids	89886-42-0	3	707868	746580	723556	525168	547178	544926	C16326	ko00592
pmb2804	311.223	171.138	312.23	C18H32O4	[M-H]-	13S-Hydroperoxy-9Z,11E-octadecadienoic acid	Lipids	Free fatty acids	33964-75-9	3	2.97489e+06	172623	3.02058e+06	2.38051e+06	2.48051e+06	2.39349e+06	C04717	ko00591,ko01100
Wbmn005986	651.23	651.23	652.237	C31H40O15	[M-H]-	Isomartynoside	Phenolic acids	Phenolic acids	94410-22-7	3	1.86522e+07	1.83224e+07	2.02054e+07	1.58141e+07	1.51219e+07	1.54123e+07	-	-
Lmmp003903	491.118	287.05	490.111	C23H22O12	[M+H]+	Kaempferol-3-O-(2''-O-acetyl)glucoside	Flavonoids	Flavonols	-	3	187165	280672	212390	165556	172759	171471	-	-
mws5035	279.17	120.085	278.163	C15H22N2O3	[M+H]+	L-Leucyl-L-phenylalanine	Amino acids and derivatives	Amino acids and derivatives	56217-82-4	3	859961	728200	844226	791592	816219	827517	-	-
mws0180	153.02	109.03	154.027	C7H6O4	[M-H]-	2,5-Dihydroxybenzoic acid; Gentisic Acid*	Phenolic acids	Phenolic acids	490-79-9	1	3.78953e+06	3.5061e+06	4.04996e+06	3.28266e+06	3.16374e+06	3.15107e+06	C00628	ko00350,ko01100
mws0724	298.08	208.05	299.087	C10H13N5O6	[M-H]-	8-Hydroxyguanosine	Nucleotides and derivatives	Nucleotides and derivatives	3868-31-3	2	310876	284108	323079	258582	270370	266639	-	-
pmb0818	206.081	145.052	205.074	C11H11NO3	[M+H]+	Methoxyindoleacetic acid	Alkaloids	Plumerane	3471-31-6	3	4.35791e+06	4.32166e+06	3.98261e+06	3.47326e+06	3.63499e+06	3.55486e+06	C05660	ko00380
Cmmn012461	299.2	299.2	300.209	C20H28O2	[M-H]-	Dehydroabietic acid	Terpenoids	Ditepenoids	1740-19-8	3	4.5336e+06	4.47175e+06	4.6133e+06	4.40106e+06	4.58888e+06	4.56754e+06	C12078	-
mws0264	341.109	119.035	342.116	C12H22O11	[M-H]-	D-Trehalose*	Others	Saccharides	99-20-7	1	3.58362e+07	4.0368e+07	3.59473e+07	3.74972e+07	3.58413e+07	3.64845e+07	C01083	ko00500,ko01100,ko01110,ko02010
MW0150921	525.23	153.06	526.239	C22H34N6O9	[M-H]-	His-Glu-Ile-Glu	Amino acids and derivatives	Amino acids and derivatives	-	3	213444	191079	206533	155656	161158	162564	-	-
Lmbn001609	145.05	83.05	146.058	C6H10O4	[M-H]-	2-Acetyl-2-Hydroxybutanoic Acid	Organic acids	Organic acids	-	3	254299	231539	249950	234046	223643	227817	C06006	ko00290,ko01100,ko01110,ko01210,ko01230
MWS20987	174.124	70.0655	173.116	C7H15N3O2	[M+H]+	N5-(1-Iminoethyl)-L-ornithine	Amino acids and derivatives	Amino acids and derivatives	36889-13-1	3	1.14215e+06	1.25093e+06	1.28201e+06	1.25247e+06	1.23013e+06	1.28743e+06	-	-
Zbsn006299	201.06	157.06	202.063	C12H10O3	[M-H]-	Plumbagin Methyl Ether; 5-Methoxy-2-Methyl-1,4-Naphthoquinone	Quinones	Quinones	22266-99-5	3	1.02299e+06	898497	1.12135e+06	578563	553409	560486	-	-
pme1816	353.09	191.06	354.095	C16H18O9	[M-H]-	Neochlorogenic acid (5-O-Caffeoylquinic acid)*	Phenolic acids	Phenolic acids	906-33-2	1	5.51084e+06	5.11025e+06	6.41777e+06	4.68095e+06	4.89487e+06	4.84305e+06	C17147	-
Lmsp008443	333.1	167.03	332.09	C17H16O7	[M+H]+	3,3',5-Trihydroxy-4',7-dimethoxyflavanone	Flavonoids	Flavanones	-	3	1.1994e+06	1.03131e+06	1.18251e+06	665763	690784	695224	-	-
Lmwp005504	247.098	175.039	246.089	C14H14O4	[M+H]+	Nodakenetin	Lignans and Coumarins	Coumarins	495-32-9	1	6.25077e+06	6.23586e+06	6.55594e+06	5.44406e+06	5.23377e+06	5.4568e+06	-	-
pmc0066	333.06	137.05	332.052	C10H13N4O7P	[M+H]+	2'-Deoxyinosine-5'-monophosphate	Nucleotides and derivatives	Nucleotides and derivatives	3393-18-8	3	6.70476e+06	7.02279e+06	6.0207e+06	7.04524e+06	6.9175e+06	6.72496e+06	C06196	ko00230,ko01232
Lmlp002205	197.12	161.1	196.11	C11H16O3	[M+H]+	Isololiolide	Terpenoids	Monoterpenoids	38274-00-9	1	2.42336e+07	2.31863e+07	2.43943e+07	2.03685e+07	2.07744e+07	1.98245e+07	-	-
Wayp001024	280.14	216.12	279.132	C11H21NO7	[M+H]+	N-(1-Deoxy-1-fructosyl)Valine	Nucleotides and derivatives	Nucleotides and derivatives	-	1	2.25107e+07	2.29206e+07	2.43389e+07	1.97324e+07	2.0035e+07	1.91281e+07	-	-
Lmtn004049	263.13	204.12	264.136	C15H20O4	[M-H]-	Abscisic acid	Organic acids	Organic acids	21293-29-8	1	506267	477184	515025	456078	474916	475436	C06082	ko00906,ko01100,ko01110,ko04075
pme2074	322.202	130.05	323.21	C18H29NO4	[M-H]-	Jasmonoyl-L-Isoleucine	Amino acids and derivatives	Amino acids and derivatives	120330-93-0	3	1.10465e+07	1.00643e+07	1.13977e+07	8.73926e+06	9.11224e+06	9.09818e+06	C18699	ko04075
Lmdp003286	465.102	303.061	464.096	C21H20O12	[M+H]+	Isohyperoside*	Flavonoids	Flavonols	35589-21-0	1	54389215	1.42174e+07	60748320	1.5721e+07	1.5287e+07	1.50029e+07	-	-
Li512111	519.11	315.05	520.122	C24H24O13	[M-H]-	Isorhamnetin-3-O-(6''-acetylglucoside)	Flavonoids	Flavonols	-	3	1.64073e+06	1.36113e+06	1.7881e+06	838716	847872	877530	-	-
MEDL01869	307.19	185.12	308.199	C18H28O4	[M-H]-	Methylgingerol	Phenolic acids	Phenolic acids	-	3	242276	279682	256364	223178	215890	213199	-	-
mws0179	367.103	190.9	368.111	C17H20O9	[M-H]-	Chlorogenic acid methyl ester	Phenolic acids	Phenolic acids	29708-87-0	3	601423	528426	570429	498597	511485	487756	-	-
MWS04555g	132.1	86.1	131.095	C6H13NO2	[M+H]+	D-Allo-Isoleucine	Amino acids and derivatives	Amino acids and derivatives	1509-35-9	1	6.27055e+06	5.48312e+06	6.03346e+06	5.12933e+06	5.33404e+06	5.11133e+06	-	-
Lmrj001698	219.13	60.04	218.127	C9H18N2O4	[M+H]+	L-Seryl-L-Isoleucine	Amino acids and derivatives	Amino acids and derivatives	91086-51-0	3	339824	325752	304899	274773	287766	278551	-	-
MWSslk208	301.218	301.218	302.225	C20H30O2	[M-H]-	Kaurenoic Acid	Terpenoids	Ditepenoids	6730-83-2	3	403022	393857	393522	410346	392243	406938	C11874	ko00904,ko01100,ko01110
Lmhp008718	506.324	184.073	505.317	C25H48NO7P	[M+H]+	LysoPC 17:2	Lipids	LPC	-	3	62529.3	49109.5	75158.1	18395.1	17621.2	18352	-	-
MWS201465	295.13	120.08	294.122	C14H18N2O5	[M+H]+	Glu-Phe	Amino acids and derivatives	Amino acids and derivatives	20556-22-3	1	964679	833017	1.00501e+06	829639	804032	843183	-	-
Lmhp007840	534.36	184.07	533.348	C27H52NO7P	[M+H]+	LysoPC 19:2	Lipids	LPC	-	3	546972	590995	966650	470995	472319	452259	-	-
Zmmp002946	295.13	120.08	294.122	C14H18N2O5	[M+H]+	(3-(carboxyamino)-2-methylpropanoyl)phenylalanine	Amino acids and derivatives	Amino acids and derivatives	-	1	1.73912e+07	1.57735e+07	1.90929e+07	1.68071e+07	1.65824e+07	1.60344e+07	-	-
MWS201388	246.109	141.066	245.101	C9H15N3O5	[M+H]+	Asn-Hyp	Amino acids and derivatives	Amino acids and derivatives	844640-50-2	3	114065	128495	111159	112066	114760	117626	-	-
pmb0874	478.293	337.274	477.286	C23H44NO7P	[M+H]+	LysoPE 18:2(2n isomer)	Lipids	LPE	-	3	356231	402340	503127	75551.8	75299.8	78644.3	-	-
Zmyn004732	293.21	185.12	294.219	C18H30O3	[M-H]-	2R-hydroxy-9Z,12Z,15Z-octadecatrienoic acid	Lipids	Free fatty acids	-	2	5.74929e+06	5.71338e+06	5.64658e+06	3.75376e+06	3.94167e+06	3.85033e+06	C16342	ko00592
Lmyn007883	287.223	287.223	288.23	C16H32O4	[M-H]-	9,16-Dihydroxypalmitic acid	Lipids	Free fatty acids	38076-49-2	3	9.01079e+06	8.9174e+06	9.30783e+06	7.61028e+06	7.92743e+06	7.95401e+06	-	-
Zmdp000972	136.04	91.05	135.035	C4H9NO2S	[M+H]+	S-Methyl-L-cysteine	Amino acids and derivatives	Amino acids and derivatives	1187-84-4	3	1.3973e+07	1.42609e+07	1.43206e+07	1.10916e+07	1.16337e+07	1.14765e+07	C22040	ko02010
Lmap002044	205.05	87.04	204.042	C11H8O4	[M+H]+	2-Methoxyjuglone	Quinones	Quinones	15127-94-3	3	77356.7	121725	72736.6	66717	70065.8	68691.3	-	-
Hmln000873	331.07	169.01	332.074	C13H16O10	[M-H]-	2-O-Galloyl-D-glucose	Phenolic acids	Phenolic acids	-	2	1.14335e+06	1.19578e+06	1.04763e+06	1.05283e+06	1.01223e+06	1.05971e+06	-	-
MW0015455	295.22	277.21	296.235	C18H32O3	[M-H]-	(10E,12Z)-9-HODE	Lipids	Free fatty acids	98524-19-7	3	1.1487e+06	1.05761e+06	1.14984e+06	750200	781675	748133	-	-
Rfmb091	295.23	195.14	296.235	C18H32O3	[M-H]-	9S-Hydroxy-10E,12Z-octadecadienoic acid*	Lipids	Free fatty acids	15514-85-9	1	2.15495e+07	2.00468e+07	2.14522e+07	1.41073e+07	1.34407e+07	1.391e+07	C14767	ko00591
Wahp002067	235.15	147.05	234.137	C13H18N2O2	[M+H]+	p-Coumaroylputrescine	Alkaloids	Phenolamine	34136-53-3	1	1.29734e+07	1.08778e+07	1.32325e+07	1.02957e+07	1.01913e+07	9.81922e+06	C18326	ko00330,ko01100
pme0026	147.11	84.08	146.106	C6H14N2O2	[M+H]+	L-Lysine	Amino acids and derivatives	Amino acids and derivatives	56-87-1	3	2.32447e+07	2.2639e+07	1.4778e+07	2.3838e+07	2.36858e+07	2.27638e+07	C00047	ko00300,ko00310,ko00470,ko00780,ko00960,ko00970,ko01100,ko01110,ko01210,ko01230,ko02010
MW0005464	175.08	131.09	176.084	C11H12O2	[M-H]-	5,6,7,8-Tetrahydro-2-naphthoic acid	Quinones	Naphthol	1131-63-1	3	132792	135162	125741	165624	173654	171977	-	-
Lmdn005449	239.09	195.1	240.1	C12H16O5	[M-H]-	Senkyunolide S	Others	Lactones	172723-28-3	3	491603	478943	547496	417638	410539	397538	-	-
Zbzp007397	181.12	135.12	180.115	C11H16O2	[M+H]+	5,6,7,7a-tetrahydro-4,4,7a-trimethyl-2(4H)-benzofuranone	Others	Others	15356-74-8	1	3.13831e+07	2.83326e+07	3.08317e+07	2.34501e+07	2.45357e+07	2.35577e+07	-	-
MW0108646	158.08	70.06	157.074	C7H11NO3	[M+H]+	N-Acetylproline	Amino acids and derivatives	Amino acids and derivatives	68-95-1	3	1.57311e+07	1.48211e+07	1.6392e+07	1.28927e+07	1.35498e+07	1.31477e+07	-	-
Lmtn000940	345.08	139.04	346.09	C14H18O10	[M-H]-	1-O-(3,4-Dihydroxy-5-methoxy-benzoyl)-glucoside	Phenolic acids	Phenolic acids	-	3	268052	238534	278131	216631	210047	206052	-	-
pme3827	198.076	152.071	197.069	C9H11NO4	[M+H]+	3,4-Dihydroxy-L-phenylalanine (L-Dopa)	Amino acids and derivatives	Amino acids and derivatives	59-92-7	3	3.30584e+06	3.41371e+06	3.77007e+06	2.75228e+06	2.89527e+06	2.83034e+06	C00355	ko00350,ko00950,ko00965,ko01100,ko01110
mws0277	191.06	85.03	192.063	C7H12O6	[M-H]-	Quinic Acid	Organic acids	Organic acids	77-95-2	2	1.78797e+07	2.10194e+07	2.1903e+07	1.84039e+07	1.92722e+07	1.85064e+07	C00296	ko00400,ko01100
MWSslk124	207.07	163.08	208.074	C11H12O4	[M-H]-	2-Benzylsuccinic Acid	Organic acids	Organic acids	884-33-3	3	4.00921e+06	3.83341e+06	3.82441e+06	3.3604e+06	3.19602e+06	3.2569e+06	-	-
MWS1776	109.065	65.039	108.058	C7H8O	[M+H]+	m-Cresol	Phenolic acids	Phenolic acids	108-39-4	3	150819	98611.2	104671	95731.2	92814.9	97632.6	C01467	-
pme3007	402.995	158.925	404.002	C9H14N2O12P2	[M-H]-	Uridine 5'-diphosphate	Nucleotides and derivatives	Nucleotides and derivatives	27821-45-0	3	123917	108329	116962	87915.9	92470.6	90839	C00015	ko00240,ko00908,ko01100,ko01232,ko01240
Lmbn001162	339.07	177.02	340.079	C15H16O9	[M-H]-	Esculetin-7-O-glucoside	Lignans and Coumarins	Coumarins	-	1	1.255e+06	1.39584e+06	1.44191e+06	1.32612e+06	1.27248e+06	1.26599e+06	-	-
pmb0484	104.107	60.0808	104.107	C5H14NO+	[M]+	Choline	Alkaloids	Alkaloids	62-49-7	3	1.35313e+06	1.39494e+06	1.33801e+06	1.4226e+06	1.4063e+06	1.35396e+06	C00114	ko00260,ko00564,ko01100,ko02010
NK10253223	168.06	94.06	167.058	C8H9NO3	[M+H]+	2-Amino-3-methoxybenzoic acid	Phenolic acids	Phenolic acids	3177-80-8	1	1.57143e+06	1.31071e+06	1.59657e+06	1.32127e+06	1.36573e+06	1.39067e+06	C05831	ko00380
pmn001399	405.12	243.07	406.126	C20H22O9	[M-H]-	2,4,6,4'-Tetrahydroxy-stilbene-2-O-glucoside	Others	Stilbene	-	3	278411	320044	262389	293094	279999	292790	-	-
MEDTN00649	203.04	159.04	204.042	C11H8O4	[M-H]-	1,4-Dihydroxy-2-naphthoic acid	Quinones	Naphthol	-	3	1.19337e+07	1.07283e+07	1.21351e+07	8.6592e+06	8.31955e+06	8.73773e+06	C03657	ko00130,ko01100,ko01110,ko01240
pme1178	284.1	152.06	283.092	C10H13N5O5	[M+H]+	Guanosine	Nucleotides and derivatives	Nucleotides and derivatives	118-00-3	1	2.76525e+07	2.52654e+07	2.58107e+07	2.2061e+07	2.26388e+07	2.14861e+07	C00387	ko00230,ko01100,ko01232,ko02010
pme3382	160.06	98.02	161.069	C6H11NO4	[M-H]-	N-Acetyl-L-threonine	Amino acids and derivatives	Amino acids and derivatives	17093-74-2	1	872022	801589	1.04564e+06	865613	880672	911203	-	-
MWS04447	130.09	70.07	129.079	C6H11NO2	[M+H]+	Homoproline	Amino acids and derivatives	Amino acids and derivatives	56879-46-0	3	1.80152e+07	1.68936e+07	1.76491e+07	1.66443e+07	1.58649e+07	1.65719e+07	-	-
Wagp006657	305.1	203.03	304.095	C16H16O6	[M+H]+	Heraclenol	Lignans and Coumarins	Coumarins	31575-93-6	1	5.92843e+06	5.56326e+06	6.03473e+06	4.30891e+06	4.53845e+06	4.46127e+06	-	-
pmp000804	313.14	277.2	312.136	C19H20O4	[M+H]+	Isobavachalcone D	Flavonoids	Chalcones	-	3	175125	167484	153296	165268	170911	162267	-	-
MWS201469	304.162	175.119	303.154	C11H21N5O5	[M+H]+	Glu-Arg	Amino acids and derivatives	Amino acids and derivatives	7219-59-2	3	395344	141159	298650	375467	395555	388870	-	-
Lmmn001643	163.04	119.05	164.047	C9H8O3	[M-H]-	2-Hydroxycinnamic acid*	Phenolic acids	Phenolic acids	583-17-5	1	2.58318e+06	2.22298e+06	2.13895e+06	1.93733e+06	1.87521e+06	1.97664e+06	C01772	ko00360,ko00999,ko01100,ko01110
pme2433	106.086	88.0757	105.079	C4H11NO2	[M+H]+	Diethanolamine	Alkaloids	Alkaloids	111-42-2	3	492052	467358	490616	521235	538054	510343	C06772	ko00564
mws0242	173.08	111.08	174.089	C8H14O4	[M-H]-	Suberic Acid	Organic acids	Organic acids	505-48-6	1	3.75285e+06	3.56241e+06	3.9045e+06	3.32643e+06	3.36201e+06	3.49868e+06	C08278	-
Wagp002962	471.15	163.04	470.142	C21H26O12	[M+H]+	Umbelliferone 7-O-Rutinoside	Lignans and Coumarins	Coumarins	-	2	634771	441921	474862	433342	442672	457022	-	-
Zmyn005384	299.26	253.255	300.266	C18H36O3	[M-H]-	2R-Hydroxyoctadecanoic Acid*	Lipids	Free fatty acids	26633-48-7	3	40159.7	40298.8	39246.5	39878	37790.1	38731.2	C03042	-
MWS5164	203.15	70.0653	202.143	C8H18N4O2	[M+H]+	N,N'-Dimethylarginine;SDMA*	Amino acids and derivatives	Amino acids and derivatives	30344-00-4	3	4.50202e+06	4.69769e+06	3.78574e+06	4.47493e+06	4.3364e+06	4.24167e+06	-	-
Lmsn015919	658.854	482.926	659.861	C6H18O24P6	[M-H]-	Phytic acid	Organic acids	Organic acids	83-86-3	3	39054	39220.9	35145	40199.4	39485	38115.1	C01204	ko00562,ko01100,ko04070
MW0131092	209.05	165.06	210.053	C10H10O5	[M-H]-	5-Hydroxyferulic acid	Phenolic acids	Phenolic acids	110642-42-7	3	7.13457e+06	7.40159e+06	8.06064e+06	7.29462e+06	7.22528e+06	6.92982e+06	C05619	ko00940,ko01100,ko01110
mws0972	131.071	85.0659	132.079	C6H12O3	[M-H]-	6-Hydroxyhexanoic acid	Organic acids	Organic acids	1191-25-9	3	332252	375836	362540	417589	397305	415414	C06103	-
pme2828	140.034	98.9637	139.027	C6H5NO3	[M+H]+	4-Nitrophenol	Phenolic acids	Phenolic acids	100-02-7	3	1.15899e+07	1.17269e+07	1.15635e+07	1.21692e+07	1.19615e+07	1.15353e+07	C00870	-
mws0752	185.15	185.16	186.162	C11H22O2	[M-H]-	Undecylic Acid	Lipids	Free fatty acids	112-37-8	1	2.81228e+06	2.44009e+06	3.38039e+06	4.32013e+06	4.51733e+06	4.30305e+06	C17715	-
MWS4296	223.108	120.082	222.1	C11H14N2O3	[M+H]+	Glycylphenylalanine*	Amino acids and derivatives	Amino acids and derivatives	3321-03-7	1	693874	807606	886755	744829	786516	766549	-	-
mws4516	130.05	84.05	129.043	C5H7NO3	[M+H]+	Pyroglutamic acid	Amino acids and derivatives	Amino acids and derivatives	4042-36-8	1	3.19789e+06	3.14965e+06	3.13753e+06	2.61643e+06	2.5496e+06	2.69244e+06	-	-
Zbsn006549	203.03	159.04	204.042	C11H8O4	[M-H]-	8-Hydroxy-2-methoxy-1,4-naphthoquinone; 3-Methoxyjuglone	Quinones	Quinones	15254-76-9	2	9.27554e+06	8.21843e+06	9.22588e+06	6.43721e+06	6.66902e+06	6.32167e+06	-	-
pme3511	287.052	243.062	288.059	C10H12N2O8	[M-H]-	Orotidine	Others	Vitamin	314-50-1	3	227076	236616	257101	253244	249747	263204	-	-
Wbtn002952	300.11	138.06	301.116	C13H19NO7	[M-H]-	1-(β-D-Glucopyranosyl)-3-ethyl-4-methyl-1H-pyrrole-2,5-dione	Others	Ketone compounds	-	1	8.11649e+06	7.15593e+06	8.60157e+06	7.17931e+06	7.51463e+06	7.54582e+06	-	-
mws0282	203.08	116.05	204.09	C11H12N2O2	[M-H]-	L-Tryptophan	Amino acids and derivatives	Amino acids and derivatives	73-22-3	1	2.04242e+07	2.13835e+07	1.95285e+07	1.94025e+07	1.83872e+07	1.90893e+07	C00078	ko00260,ko00380,ko00400,ko00901,ko00966,ko00970,ko00996,ko01100,ko01110,ko01210,ko01230,ko01240
Zmyn004449	309.21	171.1	310.214	C18H30O4	[M-H]-	9-Hydroxy-12-oxo-10(E),15(Z)-octadecadienoic acid	Lipids	Free fatty acids	-	2	485023	418191	467276	362891	353697	343484	C21923	ko00592,ko01110
Lmhp011562	353.27	261.22	352.261	C21H36O4	[M+H]+	1-α-Linolenoyl-glycerol	Lipids	Glycerol ester	-	1	579839	672692	725179	192491	182482	189752	-	-
MWS1846	151.04	93.0347	152.047	C8H8O3	[M-H]-	Phenoxyacetic acid*	Phenolic acids	Phenolic acids	122-59-8	3	115762	165343	125560	129302	133296	136629	C02181	-
mws0749	137.02	93.03	138.032	C7H6O3	[M-H]-	4-Hydroxybenzoic acid	Phenolic acids	Phenolic acids	99-96-7	1	7.66176e+06	7.40749e+06	7.62112e+06	7.06794e+06	7.29944e+06	6.91042e+06	C00156	ko00130,ko00790,ko01100,ko01110,ko01240
MWS20645	239.103	136.076	238.095	C11H14N2O4	[M+H]+	Gly-Tyr*	Amino acids and derivatives	Amino acids and derivatives	658-79-7	1	813642	726594	758033	671440	693046	655964	-	-
MWS4295	299.259	253.251	300.266	C18H36O3	[M-H]-	DL-2-hydroxystearic acid*	Lipids	Free fatty acids	629-22-1	3	38409.6	35538.6	37720.4	34414.7	32564.9	33412.2	-	-
MWS00330g	116.071	70.0662	115.063	C5H9NO2	[M+H]+	1-Amino-1-cyclobutane-carboxylic-acid	Amino acids and derivatives	Amino acids and derivatives	22264-50-2	3	15893146	1.49005e+07	1.51034e+07	1.37359e+07	1.3544e+07	1.42865e+07	-	-
Wasn001627	295.1	89.02	296.111	C11H20O9	[M-H]-	Glucosyl 2,3-Dihydroxy-2-Methylbutanoic Acid	Organic acids	Organic acids	-	1	4.57511e+06	3.84627e+06	4.75864e+06	3.92688e+06	4.08631e+06	3.87249e+06	-	-
Lmcp002302	312.13	180.088	311.123	C12H17N5O5	[M+H]+	N6-(2-Hydroxyethyl)adenosine*	Nucleotides and derivatives	Nucleotides and derivatives	4338-48-1	3	411329	375831	399702	340981	360588	349518	-	-
MWS00411g	162.076	98.0607	161.069	C6H11NO4	[M+H]+	L-2-Aminoadipate*	Amino acids and derivatives	Amino acids and derivatives	1118-90-7	3	7.00428e+06	6.95329e+06	6.05112e+06	6.49645e+06	6.84847e+06	6.56262e+06	-	-
MWSmce617	247.1	175.04	246.089	C14H14O4	[M+H]+	Marmesin	Lignans and Coumarins	Coumarins	13849-08-6	2	5.83572e+06	5.74047e+06	6.27831e+06	5.01815e+06	4.84226e+06	5.12257e+06	-	-
Zmdp001857	311.12	165.05	310.116	C14H18N2O6	[M+H]+	γ-Glutamyltyrosine	Amino acids and derivatives	Amino acids and derivatives	7432-23-7	3	3.08365e+06	2.93203e+06	3.03678e+06	2.46525e+06	2.46881e+06	2.59031e+06	-	-
MEDTN00717	315.19	187.11	314.188	C20H26O3	[M+H]+	4-Oxoretinoic acid	Organic acids	Organic acids	64907-22-8	3	657556	661291	714333	645302	667631	631098	C16678	ko01100
MWSmce632	195.06	93.03	194.058	C10H10O4	[M+H]+	Vanillin acetate	Phenolic acids	Phenolic acids	881-68-5	3	3.14613e+06	2.85353e+06	2.954e+06	2.72427e+06	2.57585e+06	2.68212e+06	-	-
MW0130930	161.02	133.03	162.032	C9H6O3	[M-H]-	3-Hydroxycoumarin	Lignans and Coumarins	Coumarins	939-19-5	3	3.7788e+06	3.26753e+06	3.14629e+06	3.27843e+06	3.46965e+06	3.4067e+06	-	-
MWS04412	175.12	70.07	174.137	C8H18N2O2	[M+H]+	N(6),N(6)-Dimethyl-L-lysine	Amino acids and derivatives	Amino acids and derivatives	2259-86-1	3	4.37815e+07	4.48205e+07	4.34317e+07	4.22358e+07	3.98693e+07	4.10702e+07	-	-
MWSmce200	203.03	147.04	202.027	C11H6O4	[M+H]+	Bergaptol	Lignans and Coumarins	Coumarins	486-60-2	1	1.32962e+07	1.15816e+07	1.48909e+07	6.13425e+06	5.92615e+06	5.79391e+06	C00758	ko00999,ko01110
MWS04491	114.055	68.0504	113.048	C5H7NO2	[M+H]+	3,4-Dehydro-DL-proline	Amino acids and derivatives	Amino acids and derivatives	3395-35-5	3	199208	153089	443392	170944	161667	164256	-	-
mws0444	152.035	108.046	153.043	C7H7NO3	[M-H]-	3-Aminosalicylic acid	Phenolic acids	Phenolic acids	570-23-0	3	478563	415097	507110	366165	388003	377202	-	-
mws0355	441.083	169.015	442.09	C22H18O10	[M-H]-	Catechin gallate*	Flavonoids	Flavanols	130405-40-2	3	246734	259568	236316	257776	244196	255814	-	-
Lmtp005226	221.19	105.07	220.183	C15H24O	[M+H]+	Santalol	Terpenoids	Sesquiterpenoids	11031-45-1	3	613250	564735	699541	540731	522253	553887	-	-
mws0192	117.02	73.03	118.027	C4H6O4	[M-H]-	Succinic acid*	Organic acids	Organic acids	110-15-6	1	7.27296e+06	6.30049e+06	6.66305e+06	6.27673e+06	5.91921e+06	6.06008e+06	C00042	ko00020,ko00190,ko00250,ko00310,ko00350,ko00360,ko00620,ko00630,ko00640,ko00650,ko00760,ko00920,ko01100,ko01110,ko01200
Zmzn000078	168.99	78.96	169.998	C3H7O6P	[M-H]-	Dihydroxyacetone phosphate	Others	Saccharides	57-04-5	3	33117.2	30948.8	30506.8	28819.7	27391.2	28869.6	C00111	ko00010,ko00040,ko00051,ko00052,ko00561,ko00562,ko00564,ko00640,ko00710,ko00760,ko01100,ko01110,ko01200,ko01230
Wayn000341	293.1	131.05	294.107	C10H18N2O8	[M-H]-	N-(1-Deoxy-1-fructosyl)Asparagine	Nucleotides and derivatives	Nucleotides and derivatives	-	3	2.5337e+06	2.96542e+06	2.53229e+06	3.20763e+06	3.05142e+06	3.21921e+06	-	-
Lmzn001582	387.166	207.102	388.173	C18H28O9	[M-H]-	5'-Glucosyloxyjasmanic acid	Phenolic acids	Phenolic acids	-	3	564201	648878	601405	621413	631600	596064	-	-
Lmbn013410	205.16	189.127	206.167	C14H22O	[M-H]-	2,4-Di-Tert-Butylphenol*	Phenolic acids	Phenolic acids	96-76-4	1	2.07603e+06	2.4447e+06	2.10547e+06	2.08428e+06	2.086e+06	1.97947e+06	-	-
Ladp002935	190.05	144.04	189.043	C10H7NO3	[M+H]+	3-quinolinecarboxylic acid	Alkaloids	Quinoline alkaloids	-	1	4.93124e+06	4.39318e+06	4.9138e+06	4.10571e+06	4.31721e+06	4.09802e+06	-	-
Lmbn005443	293.212	235.172	294.219	C18H30O3	[M-H]-	13-KODE; (9Z,11E)-13-Oxooctadeca-9,11-dienoic acid*	Lipids	Free fatty acids	54739-30-9	3	677672	698963	721199	452547	470135	480138	C14765	ko00591
Lmsn002815	593.15	285.04	594.159	C27H30O15	[M-H]-	Kaempferol-3-O-rutinoside(Nicotiflorin)	Flavonoids	Flavonols	17650-84-9	1	4.18778e+07	3.6124e+07	4.55044e+07	2.93135e+07	2.84539e+07	2.76107e+07	C21833	ko00944,ko01110
Zmbp102502	343.138	135.079	342.132	C16H22O8	[M+H]+	Baihuaqianhuoside	Others	Others	-	3	1.09107e+06	666880	734534	976359	950155	1.00896e+06	-	-
Lmbn005369	295.23	195.14	296.235	C18H32O3	[M-H]-	13(S)-HODE;13(S)-Hydroxyoctadeca-9Z,11E-dienoic acid*	Lipids	Free fatty acids	10219-69-9	1	2.30224e+07	2.11544e+07	2.24257e+07	1.49223e+07	1.41301e+07	1.48625e+07	C14762	ko00591
Zmdp000917	160.107	114.036	159.101	C6H13N3O2	[M+H]+	δ-Guanidinovaleric acid	Organic acids	Organic acids	462-93-1	3	384920	295016	443685	410745	388646	391387	-	-
MW0001372	159.05	130.04	160.052	C10H8O2	[M-H]-	1,4-Dihydroxynaphthalene	Quinones	Naphthol	-	3	7.37561e+06	6.92709e+06	7.77296e+06	5.20732e+06	5.03859e+06	5.35461e+06	C14785	-
Wagp001741	429.19	267.14	428.18	C19H28N2O9	[M+H]+	N-(gamma-L-glutamyl)tyramine O-glucoside	Alkaloids	Phenolamine	-	3	382053	395814	403946	291899	276051	290658	-	-
MWS2066	143.051	115.055	144.058	C10H8O	[M-H]-	1-Naphthol*	Phenolic acids	Phenolic acids	90-15-3	3	19235.4	45203.1	9400.38	11499.3	11984	12219.1	C11714	-
pme1611	433.114	313.071	434.121	C21H22O10	[M-H]-	Isohemiphloin	Flavonoids	Flavanones	3682-02-8	3	1.93716e+06	1.80102e+06	1.92583e+06	1.43266e+06	1.39467e+06	1.48361e+06	-	-
pme3154	147.066	59.0139	148.074	C6H12O4	[M-H]-	Mevalonic acid	Organic acids	Organic acids	150-97-0	3	1.35796e+06	1.19641e+06	1.37568e+06	1.13502e+06	1.09062e+06	1.06792e+06	C00418	ko00900,ko01100,ko01110
pme3083	164.035	120.045	165.043	C8H7NO3	[M-H]-	2-(Formylamino)benzoic acid	Phenolic acids	Phenolic acids	3342-77-6	3	5.62894e+06	5.0038e+06	5.13742e+06	4.85439e+06	4.71424e+06	5.01654e+06	C05653	ko00380,ko01100
Zadn009075	311.22	223.17	312.23	C18H32O4	[M-H]-	Hydroperoxylinoleic acid*	Lipids	Free fatty acids	34444-18-3	2	1.94336e+06	1.84288e+06	2.02086e+06	1.55731e+06	1.49432e+06	1.58914e+06	-	-
pmb2620	207.07	133.07	208.074	C11H12O4	[M-H]-	3,4-Dimethoxycinnamic acid	Phenolic acids	Phenolic acids	2316-26-9	3	483362	435164	517311	229042	228986	216858	-	-
pmb3101	175.06	115.04	176.069	C7H12O5	[M-H]-	2-Isopropylmalic Acid	Organic acids	Organic acids	49601-06-1	1	331297	309196	320724	285279	268660	281380	C02504	ko00290,ko00620,ko01100,ko01110,ko01210,ko01230
mws0102	160.04	116.051	161.048	C9H7NO2	[M-H]-	Indole-5-carboxylic acid*	Alkaloids	Plumerane	1670-81-1	3	1.51083e+06	1.32566e+06	1.47573e+06	1.16723e+06	1.24171e+06	1.19616e+06	-	-
mws0712	130.051	86.0595	131.058	C5H9NO3	[M-H]-	N-Propionylglycine	Amino acids and derivatives	Amino acids and derivatives	21709-90-0	3	1.92915e+06	1.74118e+06	1.82255e+06	1.67343e+06	1.57237e+06	1.63259e+06	-	-
MW0145900	489.2	181.12	490.202	C18H30N6O10	[M-H]-	Asn-Thr-Gln-Glu	Amino acids and derivatives	Amino acids and derivatives	-	3	874226	819437	822920	663766	706626	688471	-	-
Lakn002075	431.12	137.02	432.127	C18H24O12	[M-H]-	4-Hydroxybenzoic acid glucosyl xyloside	Phenolic acids	Phenolic acids	-	1	1.35238e+06	1.58819e+06	1.54961e+06	1.27245e+06	1.2484e+06	1.327e+06	-	-
pmp001251	520.34	184.07	519.332	C26H50NO7P	[M+H]+	LysoPC 18:2(2n isomer)	Lipids	LPC	-	1	6.46367e+06	6.92766e+06	6.84509e+06	1.04963e+06	1.11641e+06	1.0726e+06	-	-
pmb0981	348.07	136.062	347.063	C10H14N5O7P	[M+H]+	Adenosine 5'-monophosphate	Nucleotides and derivatives	Nucleotides and derivatives	61-19-8	3	1.64079e+06	1.22354e+06	1.15397e+06	1.15623e+06	1.11023e+06	1.08718e+06	C00020	ko00230,ko00908,ko01100,ko01110,ko01232,ko01240
Layp002880	341.09	179.03	340.079	C15H16O9	[M+H]+	5,7-Dihydroxychromone glucoside	Others	Ketone compounds	-	1	4.01233e+07	4.16104e+07	4.26353e+07	3.60229e+07	3.4889e+07	3.71626e+07	-	-
MWStz054	152.107	91.0641	151.1	C9H13NO	[M+H]+	2,4,6,6-Tetramethyl-3(6H)-pyridinone	Alkaloids	Pyridine alkaloids	203524-64-5	3	72601.8	76870.3	53935.1	106973	100487	103015	-	-
mws0425	129.019	85.0295	130.027	C5H6O4	[M-H]-	Citraconic acid	Organic acids	Organic acids	498-23-7	3	8.68554e+06	9.05048e+06	8.34386e+06	1.20732e+07	1.25408e+07	1.17803e+07	C02226	ko00290,ko00660,ko01100,ko01210
pme3017	104.07	58.07	103.063	C4H9NO2	[M+H]+	2-Aminoisobutyric acid*	Organic acids	Organic acids	62-57-7	3	1.75731e+07	1.87605e+07	1.98468e+07	1.84655e+07	1.73585e+07	1.81393e+07	C03665	-
Zmyn000108	209.03	85.03	210.038	C6H10O8	[M-H]-	D-Saccharic acid*	Others	Saccharides	87-73-0	1	1.41408e+06	1.27822e+06	1.12583e+06	1.26828e+06	1.2272e+06	1.30743e+06	C00818	ko00053,ko01100
MWSHC20196	237.19	81.07	236.178	C15H24O2	[M+H]+	10α-Hydroxy-cadin-4-en-15-al	Terpenoids	Sesquiterpenoids	398147-37-0	2	739931	677452	700505	568975	539099	570600	-	-
Lmbn007891	313.24	183.14	314.246	C18H34O4	[M-H]-	Hydroxy ricinoleic acid	Lipids	Free fatty acids	-	1	393636	364430	404066	274971	288717	272147	-	-
Zmhn002334	355.104	193.049	356.111	C16H20O9	[M-H]-	6-O-Feruloyl-β-D-glucose	Phenolic acids	Phenolic acids	137887-25-3	3	185076	224053	169491	176991	168773	166583	-	-
MWS201442	267.135	120.081	266.127	C13H18N2O4	[M+H]+	Phe-Thr	Amino acids and derivatives	Amino acids and derivatives	51352-44-4	1	816836	708977	797831	697561	714788	670479	-	-
mws1346	162.08	98.06	161.069	C6H11NO4	[M+H]+	DL-2-Aminoadipic acid*	Alkaloids	Alkaloids	542-32-5	3	2.063e+07	1.93416e+07	1.94221e+07	1.77528e+07	1.7351e+07	1.8485e+07	C00956	ko00300,ko00310,ko00311,ko01100,ko01110,ko01210,ko01230
Zaqp008131	217.05	202.03	216.042	C12H8O4	[M+H]+	sphondin	Lignans and Coumarins	Coumarins	483-66-9	1	7.04547e+06	7.24243e+06	7.32226e+06	5.10129e+06	4.87156e+06	5.18609e+06	C18081	-
Zamn00402	179.056	59.0139	180.063	C6H12O6	[M-H]-	sorbose*	Others	Saccharides	3615-56-3	1	4.22183e+06	4.69218e+06	4.33351e+06	4.34847e+06	4.07686e+06	4.20346e+06	C01452	-
pme0075	188.06	128.04	189.064	C7H11NO5	[M-H]-	N-Acetyl-L-glutamic acid	Amino acids and derivatives	Amino acids and derivatives	1188-37-0	1	2.64432e+06	2.65861e+06	2.69658e+06	2.39504e+06	2.37066e+06	2.25351e+06	C00624	ko00220,ko01100,ko01110,ko01210,ko01230
Lhqp101814	217.05	202.03	216.042	C12H8O4	[M+H]+	Isobergapten	Lignans and Coumarins	Coumarins	482-48-4	1	7.01871e+06	7.43401e+06	7.78115e+06	5.12095e+06	4.83261e+06	5.11285e+06	C18082	-
MWSHC2022	359.1	197.05	360.106	C15H20O10	[M-H]-	Glucosyringic acid	Phenolic acids	Phenolic acids	33228-65-8	1	5.72478e+06	4.82293e+06	5.42186e+06	4.26862e+06	4.49148e+06	4.22806e+06	-	-
Lhsp101904	235.17	179.11	234.162	C15H22O2	[M+H]+	polygodial	Terpenoids	Sesquiterpenoids	6754-20-7	1	3.53955e+06	4.56709e+06	3.66657e+06	3.65367e+06	3.89069e+06	3.83878e+06	C09712	-
pme3193	116.035	74.0248	117.043	C4H7NO3	[M-H]-	N-Acetyl-L-glycine	Amino acids and derivatives	Amino acids and derivatives	543-24-8	3	468664	413321	418897	390258	365197	377054	-	-
mws1060	267.07	135.03	268.081	C10H12N4O5	[M-H]-	9-(Arabinosyl)hypoxanthine	Nucleotides and derivatives	Nucleotides and derivatives	7013-16-3	1	2.41117e+07	2.07964e+07	2.43632e+07	1.89004e+07	2.02038e+07	1.95058e+07	-	-
mws0668	283.07	151.03	284.076	C10H12N4O6	[M-H]-	Xanthosine	Nucleotides and derivatives	Nucleotides and derivatives	146-80-5	1	6.84731e+06	6.38809e+06	6.52619e+06	6.74274e+06	6.50709e+06	6.30712e+06	C01762	ko00230,ko00232,ko01100,ko01110,ko01232,ko02010
Zmhn002227	385.11	223.06	386.121	C17H22O10	[M-H]-	4-O-Glucosyl-sinapate	Phenolic acids	Phenolic acids	-	1	3.48505e+06	3.0223e+06	2.93548e+06	2.83708e+06	2.83444e+06	3.0034e+06	C02919	-
pmp000588	549.12	463.12	548.117	C25H24O14	[M+H]+	Diosmetin-7-O-(6''-malonyl)glucoside	Flavonoids	Flavones	-	1	1.22884e+06	1.12244e+06	1.48626e+06	839667	833189	789002	-	-
pmb0889	279.232	95.0855	278.225	C18H30O2	[M+H]+	Punicic acid (9Z,11E,13Z-octadecatrienoic acid)	Lipids	Free fatty acids	544-72-9	3	9.70248e+06	1.01756e+07	1.07069e+07	6.32147e+06	6.76049e+06	6.52419e+06	C08364	-
pmb0964	366.177	204.124	365.17	C16H23N5O5	[M+H]+	Isopentenyladenine-7-N-glucoside	Nucleotides and derivatives	Nucleotides and derivatives	-	3	1.11925e+07	1.1677e+07	1.16745e+07	1.19219e+07	1.16351e+07	1.24323e+07	-	-
MWS201400	304.17	188.07	303.158	C16H21N3O3	[M+H]+	Val-Trp	Amino acids and derivatives	Amino acids and derivatives	24587-37-9	1	1.40335e+06	1.21524e+06	1.41257e+06	1.13634e+06	1.09041e+06	1.16598e+06	-	-
mws0628	121.03	92.03	122.037	C7H6O2	[M-H]-	4-Hydroxybenzaldehyde	Phenolic acids	Phenolic acids	123-08-0	1	6.23524e+06	5.83638e+06	6.41755e+06	5.32256e+06	5.25204e+06	5.59621e+06	C00633	ko01100
mws0154	173.05	93.03	174.053	C7H10O5	[M-H]-	Shikimic acid	Organic acids	Organic acids	138-59-0	2	1.66637e+06	1.62849e+06	1.65592e+06	1.56582e+06	1.63873e+06	1.53478e+06	C00493	ko00400,ko00996,ko00999,ko01100,ko01110,ko01230,ko01240
MW0158989	499.22	455.23	498.207	C20H30N6O9	[M+H]+	Val-Glu-His-Asp	Amino acids and derivatives	Amino acids and derivatives	-	3	3.39952e+06	2.87943e+06	3.17065e+06	2.80639e+06	2.76854e+06	2.95081e+06	-	-
Zmyn004714	297.24	183.14	298.251	C18H34O3	[M-H]-	Ricinoleic acid	Lipids	Free fatty acids	141-22-0	2	8.19652e+06	8.18233e+06	8.12773e+06	9.48008e+06	8.95917e+06	9.52839e+06	C08365	-
pme1936	114.066	86.0713	113.059	C4H7N3O	[M+H]+	Creatinine	Organic acids	Organic acids	60-27-5	3	791337	725811	739988	680246	671705	715737	C00791	ko00330,ko01100
MW0146115	505.22	470.18	504.218	C19H32N6O10	[M+H]+	Asp-Gly-Lys-Ala-Asp	Amino acids and derivatives	Amino acids and derivatives	-	3	175785	128632	227980	160055	168223	170878	-	-
MWSmce248	163.045	119.054	164.047	C9H8O3	[M-H]-	3-Hydroxycinnamic Acid*	Phenolic acids	Phenolic acids	14755-02-3	1	2.40527e+06	2.32466e+06	2.21048e+06	1.91685e+06	1.8406e+06	1.9696e+06	C12621	ko00360,ko01100
mws0160	181.051	109.029	182.058	C9H10O4	[M-H]-	3,4-Dihydroxybenzoic Acid Ethyl Ester (Protocatechuic acid ethyl ester)	Phenolic acids	Phenolic acids	3943-89-3	3	191421	179749	181995	135415	133612	126894	-	-
mws0183	153.02	109.03	154.027	C7H6O4	[M-H]-	3,4-Dihydroxybenzoic acid (Protocatechuic acid)*	Phenolic acids	Phenolic acids	99-50-3	1	9.20358e+06	8.23083e+06	9.20994e+06	7.99905e+06	7.93509e+06	8.44326e+06	C00230	ko01100,ko01110
Lmyn011997	337.311	337.311	338.318	C22H42O2	[M-H]-	Erucic acid	Lipids	Free fatty acids	112-86-7	3	1.56906e+06	579571	885452	865824	855257	811561	C08316	ko01040
Lmbn005487	313.24	251.24	314.246	C18H34O4	[M-H]-	12,13-DHOME; (9Z)-12,13-Dihydroxyoctadec-9-enoic acid	Lipids	Free fatty acids	263399-35-5	2	137123	129816	141702	94266.6	88061	90833	C14829	ko00591
Wafp002664	293.157	147.044	292.142	C15H20N2O4	[M+H]+	1-O-p-Coumaroyllysine	Alkaloids	Phenolamine	-	3	506440	449787	474414	454666	485534	478395	-	-
Zmdp000292	189.135	70.0652	188.127	C7H16N4O2	[M+H]+	Arginine methyl ester*	Amino acids and derivatives	Amino acids and derivatives	-	3	970286	1.33456e+06	1.68641e+06	1.63019e+06	1.5666e+06	1.52304e+06	-	-
Lakn003294	343.1	181.05	344.111	C15H20O9	[M-H]-	2-β-D-Glucopyranosyloxy-5-hydroxyphenylacetic acidmethylester	Phenolic acids	Phenolic acids	-	2	6.67857e+06	7.61758e+06	7.34786e+06	6.89857e+06	7.14288e+06	7.38846e+06	-	-
mws0017	146.165	72.0808	145.158	C7H19N3	[M+H]+	Spermidine	Alkaloids	Alkaloids	124-20-9	3	388730	598827	645074	345136	333344	357067	C00315	ko00330,ko00410,ko00480,ko00940,ko01100,ko02010
pme0181	170.092	124.088	169.085	C7H11N3O2	[M+H]+	3-Methyl-L-Histidine*	Amino acids and derivatives	Amino acids and derivatives	368-16-1	3	404157	463112	387830	361946	387245	379328	C01152	ko00340,ko01100
MW0158665	523.2	199.1	524.212	C23H32N4O10	[M-H]-	Tyr-Val-Glu-Asp	Amino acids and derivatives	Amino acids and derivatives	-	3	2.38489e+06	2.29067e+06	2.3678e+06	2.03938e+06	2.18431e+06	2.12543e+06	-	-
MW0150914	413.18	251.13	412.171	C16H24N6O7	[M+H]+	His-Glu-Gln	Amino acids and derivatives	Amino acids and derivatives	-	3	4.75692e+06	4.47761e+06	4.32909e+06	4.06073e+06	4.34017e+06	4.27356e+06	-	-
pmp001287	120.08	103.05	119.073	C8H9N	[M+H]+	N-Benzylmethylene isomethylamine	Alkaloids	Alkaloids	-	1	2.73957e+06	2.52869e+06	2.65289e+06	2.49715e+06	2.4389e+06	2.33208e+06	-	-
MWSHC20168	153.02	109.03	154.027	C7H6O4	[M-H]-	Methyl cumalate*	Phenolic acids	Phenolic acids	6018-41-3	1	3.73029e+06	3.37431e+06	3.41516e+06	3.00439e+06	3.11923e+06	2.91116e+06	-	-
Lmhn003074	309.06	193.05	310.069	C14H14O8	[M-H]-	Feruloylmalic acid	Phenolic acids	Phenolic acids	-	1	1.7338e+07	2.19298e+07	2.14098e+07	2.2858e+07	2.13879e+07	2.25279e+07	-	-
Zmzp001337	172.13	98.1	172.134	C9H18NO2+	[M]+	Stachydrine Ethyl Ester	Alkaloids	Pyrrole alkaloids	-	3	452580	635317	422516	512177	498169	533588	-	-
pme3351	144.067	126.056	145.074	C6H11NO3	[M-H]-	Allysine(6-Oxo DL-Norleucine)	Amino acids and derivatives	Amino acids and derivatives	1962-83-0	3	242375	270749	293827	273458	255168	265833	C04076	ko00300,ko00310,ko00960,ko01100,ko01110,ko01230
MWS1839	165.056	92.0272	166.063	C9H10O3	[M-H]-	Ethylparaben	Phenolic acids	Phenolic acids	120-47-8	3	244576	203433	205270	166068	154954	161832	-	-
pme2679	132.102	86.0964	131.095	C6H13NO2	[M+H]+	L-Allo-isoleucine	Amino acids and derivatives	Amino acids and derivatives	1509-34-8	3	5.8832e+06	5.79643e+06	6.09048e+06	5.09848e+06	5.46512e+06	5.25305e+06	C21096	-
pme0243	131.035	87.0452	132.042	C5H8O4	[M-H]-	Glutaric acid*	Organic acids	Organic acids	110-94-1	1	4.30011e+06	4.22967e+06	4.03659e+06	4.01234e+06	3.75746e+06	3.97115e+06	C00489	ko00071,ko00310,ko01100
Lmhp002153	251.139	147.044	250.132	C13H18N2O3	[M+H]+	N-p-Coumaroylhydroxyputrescine	Alkaloids	Phenolamine	-	3	443774	431800	458433	366801	393245	377909	-	-
MWStz091	169.097	70.0653	168.09	C8H12N2O2	[M+H]+	Cyclo(L-Ala-L-Pro)	Amino acids and derivatives	Amino acids and derivatives	36357-32-1	3	572891	559455	539939	531877	517992	555115	-	-
Lmsn001014	331.067	169.014	332.074	C13H16O10	[M-H]-	1-O-Galloyl-β-D-glucose*	Phenolic acids	Phenolic acids	58511-73-2	1	1.5399e+06	1.49678e+06	1.63462e+06	1.25763e+06	1.34411e+06	1.27553e+06	C01158	ko00999
Yalp000545	130.09	84.08	129.079	C6H11NO2	[M+H]+	N-Methyl-L-proline	Amino acids and derivatives	Amino acids and derivatives	475-11-6	1	6.24201e+06	5.84906e+06	6.15017e+06	5.64086e+06	5.2786e+06	5.35121e+06	C22223	-
pme3337	384.12	252.07	383.108	C14H17N5O8	[M+H]+	Succinyladenosine	Nucleotides and derivatives	Nucleotides and derivatives	4542-23-8	1	3.10046e+07	2.7432e+07	3.21094e+07	2.4914e+07	2.67262e+07	2.60801e+07	-	-
pmb2319	482.324	184.073	481.317	C23H48NO7P	[M+H]+	LysoPC 15:0	Lipids	LPC	108273-89-8	3	101370	101719	144273	23771	25135.3	25412	-	-
Hmcp005031	263.09	191.03	262.084	C14H14O5	[M+H]+	Rutaretin	Lignans and Coumarins	Coumarins	13895-92-6	2	2.82728e+06	2.5254e+06	2.83963e+06	2.46419e+06	2.34805e+06	2.29867e+06	-	-
Hmmn004152	595.171	459.11	596.174	C27H32O15	[M-H]-	Neoeriocitrin	Flavonoids	Flavones	13241-32-2	3	138621	160526	160796	129664	120717	124530	C09805	-
pme0281	165.019	121.029	166.027	C8H6O4	[M-H]-	Terephthalic acid	Phenolic acids	Phenolic acids	100-21-0	3	2.19768e+06	1.92528e+06	2.1581e+06	2.13147e+06	2.26263e+06	2.27639e+06	C06337	ko01100
MWSmce439	147.046	119.051	148.052	C9H8O2	[M-H]-	3,4-Dihydrocoumarin	Lignans and Coumarins	Coumarins	119-84-6	3	106983	90458.7	92785	79482.6	81884.7	85376.2	C02274	ko00999
zjzp122719	261.04	215.03	260.032	C13H8O6	[M+H]+	1,3,5,6-Tetrahydroxyxanthone	Flavonoids	Other Flavonoids	5084-31-1	3	5.18436e+06	5.04915e+06	5.30292e+06	4.29286e+06	4.4774e+06	4.16809e+06	-	-
pmb1096	118.07	91.05	117.058	C8H7N	[M+H]+	Indole	Alkaloids	Plumerane	120-72-9	1	8.6395e+06	7.77217e+06	8.01795e+06	7.14205e+06	7.08497e+06	6.67766e+06	C00463	ko00380,ko00400,ko00402,ko01100,ko01110
MWSmce675	271.08	108.02	272.09	C12H16O7	[M-H]-	Arbutin	Phenolic acids	Phenolic acids	497-76-7	1	460558	381064	403691	357136	337951	333737	C06186	ko00010
Lmhp001461	229.15	70.07	228.147	C11H20N2O3	[M+H]+	L-Prolyl-L-Leucine	Amino acids and derivatives	Amino acids and derivatives	52899-07-7	2	2.23612e+06	2.24479e+06	2.53783e+06	1.84506e+06	1.98373e+06	1.92863e+06	-	-
Zmsp000237	296.132	134.08	295.127	C11H21NO8	[M+H]+	1,4-Dideoxy-1,4-imino-(2-O-β-D-glucosyl)-D-arabinitol	Alkaloids	Pyrrole alkaloids	-	3	417463	446291	396091	457523	488386	486876	-	-
MWS1816	183.14	183.14	184.146	C11H20O2	[M-H]-	10-Undecenoic acid	Lipids	Free fatty acids	112-38-9	3	33138.6	61041.9	44718.7	53844.3	54883.6	57762.5	C13910	-
Lmmn002260	551.21	389.17	552.221	C27H36O12	[M-H]-	5'-Methoxyisolariciresinol-9'-O-glucoside	Lignans and Coumarins	Lignans	-	3	880272	823002	904652	754374	767697	715041	-	-
HX1229	183.1	137.06	182.094	C10H14O3	[M+H]+	2,3,5-trimethoxytoluene	Others	Others	-	3	168338	147785	173274	133337	143228	140554	-	-
MWSslk102	155.012	119.036	154.005	C5H3ClN4	[M+H]+	6-Chloropurine	Nucleotides and derivatives	Nucleotides and derivatives	87-42-3	3	3.64652e+06	3.24629e+06	3.16931e+06	3.31438e+06	3.43616e+06	3.1919e+06	-	-
mws0609	344.04	150.043	345.047	C10H12N5O7P	[M-H]-	Guanosine 3',5'-cyclic monophosphate	Nucleotides and derivatives	Nucleotides and derivatives	7665-99-8	1	142557	128578	138832	119770	123234	114494	C00942	ko00230,ko01100
mws0005	161.107	144.081	160.1	C10H12N2	[M+H]+	Tryptamine	Alkaloids	Plumerane	61-54-1	1	1.1596e+06	1.09318e+06	1.13428e+06	957458	972052	905631	C00398	ko00380,ko00901,ko01100,ko01110
pmn001686	287.22	241.22	288.23	C16H32O4	[M-H]-	10,16-Dihydroxypalmitic acid	Lipids	Free fatty acids	3233-90-7	2	252324	238770	269140	197759	211774	210045	C08285	ko00073
MWSmce584	138.09	77.04	137.084	C8H11NO	[M+H]+	L-Tyramine	Alkaloids	Alkaloids	51-67-2	2	991725	1.0497e+06	957446	1.02665e+06	1.00079e+06	953941	C00483	ko00350,ko00950,ko01100,ko01110,ko01240
mws4017	285.222	285.222	286.23	C20H30O	[M-H]-	Ferruginol	Terpenoids	Ditepenoids	514-62-5	3	1.2777e+06	1.19111e+06	1.26728e+06	1.19925e+06	1.29144e+06	1.25429e+06	C09092	ko00904,ko01110
Lmbn001288	131.035	87.0443	132.042	C5H8O4	[M-H]-	2-Hydroxy-2-methyl-3-oxobutanoic acid*	Organic acids	Organic acids	71698-08-3	1	71662.3	69236.7	78516.2	76954.5	75407.5	81005.2	C06010	ko00290,ko00650,ko00660,ko00770,ko01100,ko01110,ko01210,ko01230
MWS3036	147.03	85.03	148.037	C5H8O5	[M-H]-	3-Hydroxyglutaric acid*	Organic acids	Organic acids	638-18-6	1	948781	963490	1.00662e+06	872811	830541	811950	-	-
MWSmce042	217.04	202.03	216.042	C12H8O4	[M+H]+	Bergapten	Lignans and Coumarins	Coumarins	484-20-8	1	7.31348e+06	7.60235e+06	7.68249e+06	5.249e+06	4.87547e+06	5.11187e+06	C01557	ko00999,ko01110
pme0295	146.08	86.06	145.074	C6H11NO3	[M+H]+	4-Acetamidobutyric acid	Organic acids	Organic acids	3025-96-5	1	1.05548e+07	9.32678e+06	9.66865e+06	9.04205e+06	8.47353e+06	8.49181e+06	C02946	ko00330,ko01100
mws0984	236.08	164.06	237.086	C9H11N5O3	[M-H]-	L-Sepiapterin	Nucleotides and derivatives	Nucleotides and derivatives	17094-01-8	3	673580	553209	663461	530434	564429	567833	C00835	ko00790,ko01100
pmb2640	199.17	199.17	200.178	C12H24O2	[M-H]-	Dodecanoic acid (Lauric acid)	Lipids	Free fatty acids	143-07-7	1	676893	657679	589723	776437	750047	808168	C02679	ko00061,ko01100,ko01110
MWS2058	151.041	107.05	152.047	C8H8O3	[M-H]-	3-Methylsalicylic Acid	Phenolic acids	Phenolic acids	83-40-9	3	77611.2	55042.9	72808.8	94379.1	88018.2	89163.2	C14088	-
MW0114605	195.14	67.05	172.146	C10H20O2	[M+Na]+	7-Hydroxy-3,7-dimethyloctanal	Others	Aldehyde compounds	107-75-5	3	3.9034e+06	3.66847e+06	3.81034e+06	3.37369e+06	3.42756e+06	3.62163e+06	-	-
pme2617	166.053	102.055	165.046	C5H11NO3S	[M+H]+	L-Methionine Sulfoxide	Amino acids and derivatives	Amino acids and derivatives	3226-65-1	3	667644	656236	715023	609592	641736	656243	C02989	ko00270,ko01100
Cmyn001328	339.07	177.02	340.079	C15H16O9	[M-H]-	Daphnin*	Lignans and Coumarins	Coumarins	486-55-5	1	1.28062e+06	1.19288e+06	1.37039e+06	1.37296e+06	1.29495e+06	1.28114e+06	C01421	-
Lmsn000381	341.11	89.02	342.116	C12H22O11	[M-H]-	D-Maltose*	Others	Saccharides	69-79-4	1	682532	836685	898791	708680	696578	748359	C01971	-
mws0133	123.06	80.05	122.048	C6H6N2O	[M+H]+	Nicotinamide	Others	Vitamin	98-92-0	3	1.83309e+06	1.44729e+06	1.70509e+06	1374061	1.44245e+06	1.481e+06	C00153	ko00760,ko01100,ko01240
MA10107783	207.03	119.05	208.037	C10H8O5	[M-H]-	3-[(1-Carboxyvinyl)oxy]benzoic acid	Phenolic acids	Phenolic acids	16929-37-6	3	440060	370265	373265	306665	330007	313315	C20772	ko00130,ko01100,ko01110,ko01240
pme2923	117.019	75.0088	118.027	C4H6O4	[M-H]-	Acetoxyacetic acid	Organic acids	Organic acids	13831-30-6	3	363944	301044	354999	294007	310612	288921	-	-
Lmlp003161	265.15	177.06	264.147	C14H20N2O3	[M+H]+	N-Feruloylputrescine	Alkaloids	Phenolamine	501-13-3	3	2.61306e+06	2.43392e+06	2.52322e+06	2.0468e+06	2.1537e+06	2.20718e+06	C10497	ko00330,ko01100
pmf0440	163.08	91.05	162.068	C10H10O2	[M+H]+	4-MethoxycinnaMaldehyde	Phenolic acids	Phenolic acids	1963-36-6	2	2.37481e+06	2.63918e+06	2.12648e+06	3.28315e+06	3.13685e+06	3.04386e+06	C10475	-
pmp000866	311.128	255.065	310.12	C19H18O4	[M+H]+	Moracin N	Phenolic acids	Phenolic acids	135248-05-4	3	259804	241009	249816	404853	432876	432992	-	-
mws4085	223.06	193.02	224.069	C11H12O5	[M-H]-	Sinapic acid	Phenolic acids	Phenolic acids	530-59-6	1	913263	907252	970970	883888	836290	900849	C00482	ko00940,ko01100,ko01110
MWSmce160	231.097	175.04	230.094	C14H14O3	[M+H]+	Demethylsuberosin	Lignans and Coumarins	Coumarins	21422-04-8	1	219734	211274	302595	85835.5	85578	91522.1	C18083	ko00999,ko01110
pme2602	184.002	96.9696	185.009	C3H8NO6P	[M-H]-	O-Phospho-L-serine	Amino acids and derivatives	Amino acids and derivatives	407-41-0	3	86514.1	88028.1	77433.7	75625.8	71747.4	77357.9	C01005	ko00260,ko00270,ko00970,ko01100,ko01110,ko01200,ko01230
pmp000790	243.065	215.07	242.058	C14H10O4	[M+H]+	Moracin M	Phenolic acids	Phenolic acids	56317-21-6	3	491654	436663	473271	409240	382962	409974	-	-
MWSmce581	137.026	91.0193	138.032	C7H6O3	[M-H]-	2,4-Dihydroxybenzaldehyde	Others	Aldehyde compounds	95-01-2	3	346753	350007	341662	273726	260830	281575	-	-
pme1665	593.151	311.055	594.159	C27H30O15	[M-H]-	Isovitexin-7-O-glucoside(Saponarin)	Flavonoids	Flavones	20310-89-8	1	266257	299066	294141	301227	291706	278884	C08064	-
Lmhp007598	534.36	184.07	533.348	C27H52NO7P	[M+H]+	LysoPC 19:2(2n isomer)	Lipids	LPC	-	3	813054	913060	896364	689102	701898	741803	-	-
MWS04559g	182.08	136.08	181.074	C9H11NO3	[M+H]+	3-Hydroxy-L-phenylalanine*	Amino acids and derivatives	Amino acids and derivatives	587-33-7	1	5.63152e+06	5.65529e+06	5.81262e+06	5041267	5.02139e+06	4.70124e+06	-	-
pmb2636	335.223	253.18	336.23	C20H32O4	[M-H]-	8,15-Dihydroxy-5,9,11,13-eicosatetraenoic acid	Lipids	Free fatty acids	77667-08-4	3	283594	244129	272214	352227	327660	331953	-	-
MW0150193	551.23	345.08	552.243	C25H36N4O10	[M-H]-	Glu-Tyr-Ile-Glu	Amino acids and derivatives	Amino acids and derivatives	-	3	1.86197e+06	2.01537e+06	2.19137e+06	1.90919e+06	1.82122e+06	1.76756e+06	-	-
pme2122	112.087	95.0604	111.08	C5H9N3	[M+H]+	Histamine	Alkaloids	Alkaloids	51-45-6	3	836621	816076	793336	793095	735093	777314	C00388	ko00340,ko01100,ko01110
Lmqn008288	299.26	299.26	300.266	C18H36O3	[M-H]-	3-Hydroxyoctadecanoic Acid	Lipids	Free fatty acids	45261-96-9	2	3.3318e+06	3.29377e+06	3.17268e+06	3.47179e+06	3.41472e+06	3.21996e+06	-	-
Sacn001940	375.13	195.07	376.137	C16H24O10	[M-H]-	8-Epiloganic acid	Terpenoids	Monoterpenoids	82509-41-9	2	496076	528154	654467	416569	409726	441258	-	-
MWSHY0033	277.18	137.06	276.173	C17H24O3	[M+H]+	[6]-Shogaol	Phenolic acids	Phenolic acids	555-66-8	3	4.02942e+06	3.96964e+06	5.64987e+06	2.87235e+06	3.0946e+06	3.05444e+06	C10494	-
pmf0293	269.285	209.226	270.292	C18H38O	[M-H]-	1-Octadecanol	Lipids	Free fatty acids	112-92-5	3	641973	652964	648578	656575	623896	607835	-	-
mws0574	103.04	57.0371	104.047	C4H8O3	[M-H]-	2-Hydroxyisobutyric acid*	Organic acids	Organic acids	594-61-6	3	167453	158360	173946	145938	155967	145565	C21297	-
pmf0367	177.02	89	178.027	C9H6O4	[M-H]-	5,7-Dihydroxychromone	Others	Chromone	31721-94-5	3	874851	835464	747528	553423	514257	520648	C09001	-
pme3034	131.035	87.0452	132.042	C5H8O4	[M-H]-	Ethylmalonic acid*	Organic acids	Organic acids	601-75-2	1	434610	450779	445421	434381	402386	411117	-	-
pme0137	187.072	125.072	188.08	C7H12N2O4	[M-H]-	N-Acetyl-L-Glutamine	Amino acids and derivatives	Amino acids and derivatives	2490-97-3	3	1.51212e+06	1.43897e+06	1.64691e+06	1.33989e+06	1.34811e+06	1.25368e+06	-	-
mws1515	193.159	175.148	192.151	C13H20O	[M+H]+	α-Ionone	Others	Ketone compounds	127-41-3	3	317451	312526	275080	239683	221887	227159	C12286	-
Hmtn001302	299.08	137.02	300.084	C13H16O8	[M-H]-	4-O-Glucosyl-4-hydroxybenzoic acid	Phenolic acids	Phenolic acids	-	1	2.2558e+07	2.21141e+07	2.2691e+07	2.15255e+07	1.99107e+07	2.0439e+07	-	-
Hmln003529	401.146	269.11	402.153	C18H26O10	[M-H]-	Benzyl β-primeveroside	Phenolic acids	Phenolic acids	130622-31-0	3	194978	255755	265385	320326	296680	315195	-	-
MW0114174	165.04	87.01	166.048	C5H10O6	[M-H]-	Arabinonic acid	Organic acids	Organic acids	488-30-2	3	7.6631e+06	7.70356e+06	6.87446e+06	7.86751e+06	7.34395e+06	7.88829e+06	C00878	ko00053,ko01100
MWSprf157	235.06	193.05	234.053	C12H10O5	[M+H]+	Scopoletin acetate	Lignans and Coumarins	Coumarins	56795-51-8	3	2.0491e+06	2.09058e+06	2.00056e+06	2.00424e+06	1.8826e+06	2.03152e+06	-	-
Hmyp002315	303.04	257.04	302.043	C15H10O7	[M+H]+	3,5,7,4'-Tetrahydroxy-Coumaronochromone	Others	Chromone	-	1	8077905	9760280	10328365	3.85921e+06	3.99344e+06	4.1822e+06	-	-
ML10177402	152.034	108.046	153.043	C7H7NO3	[M-H]-	4-Aminosalicylic acid	Phenolic acids	Phenolic acids	65-49-6	3	206791	292916	208144	161520	170186	157233	C02518	-
MW0155109	393.21	247.04	392.206	C19H28N4O5	[M+H]+	Phe-Asn-Leu	Amino acids and derivatives	Amino acids and derivatives	-	3	1.6725e+06	1.84942e+06	2.22766e+06	1916145	1.84687e+06	2.00236e+06	-	-
MWSslk106	122.096	105.071	121.089	C8H11N	[M+H]+	2-Phenylethylamine	Alkaloids	Benzylphenylethylamine alkaloids	156-28-5	3	219513	163211	225303	160971	162831	173461	C05332	ko00360,ko01100
mws5042	223.108	120.088	222.1	C11H14N2O3	[M+H]+	L-Glycyl-L-phenylalanine*	Amino acids and derivatives	Amino acids and derivatives	721-66-4	1	951629	968842	975751	894964	906288	839375	-	-
pmp000806	339.123	283.06	338.115	C20H18O5	[M+H]+	Morachalcone B	Flavonoids	Chalcones	1304030-91-8	3	23825.2	15527.9	31055	95387.9	88610.5	94920.2	-	-
Lmln010063	205.16	189.13	206.167	C14H22O	[M-H]-	2,6-Di-tert-butylphenol*	Phenolic acids	Phenolic acids	128-39-2	1	2.14392e+06	2.49431e+06	1.90282e+06	2.08586e+06	2.14691e+06	1.97758e+06	-	-
mws0064	287.056	135.045	288.063	C15H12O6	[M-H]-	Eriodictyol (5,7,3',4'-Tetrahydroxyflavanone)	Flavonoids	Flavanones	552-58-9	3	41911.9	23565.2	40629	35433.3	34911.7	37718.7	C05631	ko00941,ko01100,ko01110
Lmwn006835	201.02	173.024	202.027	C11H6O4	[M-H]-	3,4-Epoxide psoralen	Lignans and Coumarins	Coumarins	-	1	9.64425e+06	8.64355e+06	1.0185e+07	4.95861e+06	4.5849e+06	4.66721e+06	-	-
MW0110338	377.2	136.06	376.189	C14H28N6O4S1	[M+H]+	Val-Cys-Arg	Amino acids and derivatives	Amino acids and derivatives	-	3	450465	453162	553900	432940	454992	470328	-	-
pme3961	252.11	136.06	251.102	C10H13N5O3	[M+H]+	2'-Deoxyadenosine	Nucleotides and derivatives	Nucleotides and derivatives	958-09-8	3	760179	685033	744256	696789	644415	654423	C00559	ko00230,ko01100,ko01232,ko02010
MWS00275g	180.07	119.05	181.074	C9H11NO3	[M-H]-	DL-O-tyrosine	Amino acids and derivatives	Amino acids and derivatives	2370-61-8	2	78101.1	67386.6	85636.5	65217.8	70536.6	69721.2	-	-
pmb3000	503.12	341.1	504.127	C24H24O12	[M-H]-	Chrysoeriol-7-O-(6''-acetyl)glucoside	Flavonoids	Flavones	-	3	2.58843e+07	2.0831e+07	2.37588e+07	1.39257e+07	1.50991e+07	1.42645e+07	-	-
pmp001198	132.1	57.03	131.095	C6H13NO2	[M+H]+	6-Deoxyfagomine	Alkaloids	Piperidine alkaloids	197449-09-5	1	1.67697e+07	1.74537e+07	1.81308e+07	1.36663e+07	1.48615e+07	1.42752e+07	-	-
pme1598	463.125	301.071	464.132	C22H24O11	[M-H]-	Hesperetin-5-O-glucoside	Flavonoids	Flavanones	69651-80-5	3	1.10111e+07	1.01978e+07	1.27614e+07	4.5457e+06	4.76996e+06	4.38843e+06	-	-
pmb0865	518.32	184.07	517.317	C26H48NO7P	[M+H]+	LysoPC 18:3(2n isomer)	Lipids	LPC	-	1	2.10465e+07	2.20558e+07	2.23974e+07	7.40904e+06	7.78625e+06	8.05856e+06	-	-
Zaln004082	335.08	179.03	336.084	C16H16O8	[M-H]-	3-O-caffeoylshikimic acid	Phenolic acids	Phenolic acids	-	1	4.51144e+06	4.45881e+06	5.0807e+06	4.38803e+06	4.41083e+06	4.08653e+06	-	-
Zaln004057	335.08	179.03	336.084	C16H16O8	[M-H]-	4-caffeoylshikimic acid	Phenolic acids	Phenolic acids	-	1	4.51144e+06	4.45881e+06	5.0807e+06	4.38803e+06	4.41083e+06	4.08653e+06	-	-
MWSHC20189	357.13	151.04	358.142	C20H22O6	[M-H]-	Epipinoresinol*	Lignans and Coumarins	Lignans	24404-50-0	1	1.29887e+06	1.05149e+06	1.2969e+06	892748	825073	882850	-	-
pme2244	190.09	118.07	189.079	C11H11NO2	[M+H]+	3-Indolepropionic acid	Alkaloids	Plumerane	830-96-6	3	630706	633145	657008	582392	610074	560706	-	-
mws1574	373.11	123.01	374.121	C16H22O10	[M-H]-	Geniposidic acid*	Terpenoids	Monoterpenoids	27741-01-1	3	493388	470895	460125	437735	402188	417053	C11673	ko00902,ko01110
pme1228	221.092	204.065	220.085	C11H12N2O3	[M+H]+	5-Hydroxy-L-tryptophan	Amino acids and derivatives	Amino acids and derivatives	4350-09-8	3	475887	404875	497701	391338	422643	394445	C00643	ko00380,ko01100
mws0367	277.22	277.22	278.225	C18H30O2	[M-H]-	α-Linolenic Acid*	Lipids	Free fatty acids	463-40-1	2	1.19981e+07	1.30927e+07	1.35658e+07	4.35246e+06	4.7349e+06	4.489e+06	C06427	ko00592,ko01040,ko01100,ko01110
pme2559	174.04	88.04	175.048	C6H9NO5	[M-H]-	N-Acetyl-L-Aspartic Acid	Amino acids and derivatives	Amino acids and derivatives	997-55-7	3	98979.8	108880	101457	92052.5	98456.9	91037.9	C01042	ko00250,ko01100
MWSslk138	169.015	151.004	170.022	C7H6O5	[M-H]-	2,3,4-Trihydroxybenzoic acid	Phenolic acids	Phenolic acids	610-02-6	3	67217.8	54382.7	200264	87473.5	94034	94577.7	-	-
mws1595	163.061	59.0139	164.069	C6H12O5	[M-H]-	D-Fucose*	Others	Saccharides	3615-37-0	3	414929	72589.3	254751	355786	330078	356063	C01018	-
pmb3079	300.049	96.9696	301.056	C8H16NO9P	[M-H]-	N-Acetyl-D-glucosamine-1-phosphate	Others	Saccharides	6866-69-9	3	241743	283615	216044	276410	300318	294697	C04256	-
Zahp012577	280.26	81.07	279.256	C18H33NO	[M+H]+	octadecadienoic acid amide	Alkaloids	Alkaloids	-	1	349293	326887	339592	2.13074e+06	1.95789e+06	2.01931e+06	-	-
HJKP000649	136.07	91.05	135.068	C8H9NO	[M+H]+	N-benzylformamide	Alkaloids	Alkaloids	6343-54-0	1	1.37113e+07	1.36396e+07	1.48765e+07	1.26756e+07	1.16604e+07	1.24371e+07	C15561	-
mws0126	524.37	184.07	523.364	C26H54NO7P	[M+H]+	LysoPC 18:0	Lipids	LPC	19420-57-6	3	260663	232416	269351	12027.6	12874.2	13055.8	-	-
MW0150294	303.18	137.06	302.17	C11H22N6O4	[M+H]+	Gly-Arg-Ala	Amino acids and derivatives	Amino acids and derivatives	-	3	7165950	5748780	6214415	2.78598e+06	2.60271e+06	2.57346e+06	-	-
Lmcp000611	144.077	84.0556	143.07	C5H9N3O2	[M+H]+	2-Amino-4,5-dihydro-1H-imidazole-4-acetic acid	Alkaloids	Alkaloids	69098-41-5	3	1.33109e+06	1.1463e+06	1.08462e+06	1.13276e+06	1.13846e+06	1.2231e+06	-	-
MWS201455	262.14	84.08	261.132	C10H19N3O5	[M+H]+	Asp-Lys*	Amino acids and derivatives	Amino acids and derivatives	5891-51-0	3	1.09824e+07	8.93458e+06	1.22763e+07	1.07391e+07	1.09142e+07	1.16488e+07	-	-
mws0567	146.09	87.04	145.085	C5H11N3O2	[M+H]+	4-Guanidinobutyric acid	Organic acids	Organic acids	463-00-3	3	3.01271e+07	2.99581e+07	3.11239e+07	2.7844e+07	2.5941e+07	2.57597e+07	C01035	ko00330,ko01100
mws0823	115.04	71.0139	116.047	C5H8O3	[M-H]-	3-Methyl-2-Oxobutanoic acid	Organic acids	Organic acids	759-05-7	3	610421	559419	533745	786774	824378	858618	C00141	ko00280,ko00290,ko00770,ko00966,ko01100,ko01110,ko01210,ko01230,ko01240
MWS20177	267.03	223.041	268.037	C15H8O5	[M-H]-	5-hydroxy-anthraquinone-2-carboxylic acid	Quinones	Anthraquinone	-	3	241520	243418	245504	206998	189706	200036	-	-
Lmgn000219	101.024	55.0184	102.032	C4H6O3	[M-H]-	Succinic semialdehyde	Organic acids	Organic acids	692-29-5	3	15405.2	20258.5	22564.2	25312	23194.3	24127	C00232	ko00250,ko00350,ko00650,ko00750,ko00760,ko01100,ko01200
MWSmce706	129.065	56.0494	128.059	C5H8N2O2	[M+H]+	Cyclo(Ala-Gly)	Amino acids and derivatives	Amino acids and derivatives	4526-77-6	3	1.93191e+07	2.14423e+07	1.72158e+07	2.41604e+07	2.34877e+07	2.21538e+07	-	-
mws0159	163.04	91.06	164.047	C9H8O3	[M-H]-	Phenylpyruvic acid	Organic acids	Organic acids	156-06-9	3	1.40905e+06	1.33992e+06	1.64946e+06	1.24889e+06	1.35745e+06	1.27388e+06	C00166	ko00360,ko00400,ko00470,ko00960,ko01100,ko01110,ko01210,ko01230
Hmmn002544	355.1	193.05	356.111	C16H20O9	[M-H]-	Ferulic acid-4-O-glucoside	Phenolic acids	Phenolic acids	117405-51-3	1	6.21886e+06	6.30963e+06	6.57639e+06	5.55565e+06	5.44594e+06	5.1029e+06	-	-
Zmdn002400	451.13	289.07	452.132	C21H24O11	[M-H]-	Epicatechin-3'-O-β-D-glucopyranoside	Flavonoids	Flavanols	-	1	715869	638892	667024	554376	537779	586289	-	-
pme2914	161.05	99.05	162.053	C6H10O5	[M-H]-	3-Hydroxy-3-methylpentane-1,5-dioic acid	Amino acids and derivatives	Amino acids and derivatives	503-49-1	1	3.00568e+06	2.57789e+06	2.9681e+06	2.44708e+06	2.6727e+06	2.55092e+06	C03761	-
Cmmn013275	301.217	301.217	302.225	C20H30O2	[M-H]-	Isopimaric acid*	Terpenoids	Ditepenoids	5835-26-7	3	405784	338354	360433	447277	417439	454073	-	-
Lmqn000213	665.215	341.109	666.222	C24H42O21	[M-H]-	Stachyose	Others	Saccharides	470-55-3	3	41003.2	63717.6	37183	55066.7	55786.7	51318.7	C01613	ko00052,ko01100
pme2801	167.056	150.03	166.049	C6H6N4O2	[M+H]+	7-Methylxanthine	Nucleotides and derivatives	Nucleotides and derivatives	552-62-5	3	1.60149e+06	1.5405e+06	1.4872e+06	1.17085e+06	1.27276e+06	1.19173e+06	C16353	ko00232,ko01100,ko01110
Lacp005175	495.15	229.09	494.142	C23H26O12	[M+H]+	Columbianetin malonyl glucopyranoside	Lignans and Coumarins	Coumarins	-	2	1.77505e+06	1.83576e+06	1.92509e+06	1.42865e+06	1.4939e+06	1.36661e+06	-	-
mws0248	243.06	110.02	244.07	C9H12N2O6	[M-H]-	Uridine	Nucleotides and derivatives	Nucleotides and derivatives	58-96-8	1	9.00817e+06	8.11608e+06	9.5165e+06	8.31804e+06	8.78369e+06	8.04416e+06	C00299	ko00240,ko01100,ko01232,ko02010
pmf0174	157.16	157.16	158.167	C10H22O	[M-H]-	1-Decanol*	Others	Alcohol compounds	112-30-1	3	196633	221733	244355	635597	679416	692909	C01633	-
Zmmp002019	160.132	72.0814	159.126	C8H17NO2	[M+H]+	N-ethyl-leucine	Amino acids and derivatives	Amino acids and derivatives	-	1	695951	638772	565248	576690	579565	534083	-	-
Wafn002081	285.06	153.02	286.069	C12H14O8	[M-H]-	Dihydroxybenzoyl xyloside	Phenolic acids	Phenolic acids	-	1	478045	339166	399717	362350	342218	331548	-	-
pma0149	341.087	207.065	340.079	C15H16O9	[M+H]+	Sinapoyl malate	Phenolic acids	Phenolic acids	92344-58-6	3	276397	180954	264393	199181	204250	217348	C02887	ko00940,ko01110
mws0206	103.04	57.0352	104.047	C4H8O3	[M-H]-	2-Hydroxybutyric Acid*	Organic acids	Organic acids	3347-90-8	3	175279	157660	165900	133147	145180	136006	C05984	ko00640
MW0109309	359.19	189.08	358.185	C15H26N4O6	[M+H]+	Pro-Asp-Lys	Amino acids and derivatives	Amino acids and derivatives	-	3	760449	591431	795794	577941	573953	531707	-	-
Zmzp000145	189.16	84.0803	188.153	C9H20N2O2	[M+H]+	Trimethyllysine	Amino acids and derivatives	Amino acids and derivatives	23284-33-5	3	3.43248e+06	3.74381e+06	2.85837e+06	3.37602e+06	3.24466e+06	3.5543e+06	C03793	ko00310,ko01100
MWSHY0051	287.055	153.018	286.048	C15H10O6	[M+H]+	Kaempferol (3,5,7,4'-Tetrahydroxyflavone)	Flavonoids	Flavonols	520-18-3	3	65527.1	65180.2	66670.2	72703.8	76166.8	69496.9	C05903	ko00941,ko00944,ko01100,ko01110
Wafn002874	515.14	323.08	516.148	C22H28O14	[M-H]-	4-O-(4'-O-alpha-D-Glucopyranosyl)caffeoylquinic acid	Phenolic acids	Phenolic acids	1401352-62-2	1	1.68065e+06	1.65132e+06	1.78004e+06	1.53736e+06	1.56985e+06	1.43631e+06	-	-
Lmbn002072	159.066	97.0659	160.074	C7H12O4	[M-H]-	2-Propylsuccinic acid*	Organic acids	Organic acids	618-57-5	3	163416	134965	172247	161698	154573	169476	C16657	-
MW0110349	253.15	123.04	230.163	C11H22N2O3	[M+Na]+	Val-Ile	Amino acids and derivatives	Amino acids and derivatives	20556-14-3	3	4.06649e+06	3.50929e+06	3.92586e+06	3.0787e+06	3.1786e+06	2.89911e+06	-	-
pme3207	141.019	59.0139	142.027	C6H6O4	[M-H]-	Muconic acid	Organic acids	Organic acids	1119-72-8	1	2.01951e+07	1.87251e+07	1.75385e+07	2.50766e+07	2.57893e+07	2.35355e+07	C02480	ko01100
Lmhn003240	237.04	121.03	238.048	C11H10O6	[M-H]-	Benzoylmalic acid	Phenolic acids	Phenolic acids	22138-51-8	1	8.35048e+06	6.93047e+06	8.11274e+06	6.33112e+06	6.61515e+06	6.02682e+06	-	-
pmb0854	518.32	184.07	517.317	C26H48NO7P	[M+H]+	LysoPC 18:3	Lipids	LPC	-	2	2.30566e+07	2.42407e+07	2.71868e+07	8.27064e+06	8.75759e+06	9.07518e+06	-	-
MW0063357	299.22	237.23	300.23	C17H32O4	[M-H]-	2-Dodecyl-3-methylbutanedioic acid	Organic acids	Organic acids	22139-54-4	3	212258	213784	234594	168704	153673	161612	-	-
Hmtn001288	181.051	135.045	182.058	C9H10O4	[M-H]-	Methyl 2,4-dihydroxyphenylacetate*	Phenolic acids	Phenolic acids	67828-42-6	3	157492	117316	181325	164089	180014	174183	-	-
Lmbn005662	295.23	171.1	296.235	C18H32O3	[M-H]-	9(10)-EpOME;(9R,10S)-(12Z)-9,10-Epoxyoctadecenoic acid	Lipids	Free fatty acids	16833-56-0	2	590134	586664	628780	360937	379015	396288	C14825	ko00591,ko01100
mws3133	174.077	86.0607	173.069	C7H11NO4	[M+H]+	Oxaceprol	Amino acids and derivatives	Amino acids and derivatives	33996-33-7	3	873582	1.28403e+06	874839	703421	707287	649881	-	-
mws0089	447.093	285.041	448.101	C21H20O11	[M-H]-	Kaempferol-7-O-glucoside*	Flavonoids	Flavonols	16290-07-6	1	1.47225e+06	1.30951e+06	1.79634e+06	821758	839327	898239	-	-
mws0001	133.061	74.0237	132.054	C4H8N2O3	[M+H]+	L-Asparagine	Amino acids and derivatives	Amino acids and derivatives	70-47-3	1	9.62383e+06	9.08218e+06	8.89765e+06	1.0685e+07	1.03714e+07	1.13702e+07	C00152	ko00250,ko00460,ko00970,ko01100,ko01110,ko01230
MWS201458	279.17	120.09	278.163	C15H22N2O3	[M+H]+	Phe-Ile	Amino acids and derivatives	Amino acids and derivatives	22951-94-6	1	472934	517535	470641	406402	440614	406199	-	-
Lmbn005923	277.22	59.01	278.225	C18H30O2	[M-H]-	Crepenynic acid	Lipids	Free fatty acids	2277-31-8	1	345060	348984	454346	132481	140432	145646	C07289	ko00591
pme0183	152.057	135.03	151.049	C5H5N5O	[M+H]+	Isoguanine	Nucleotides and derivatives	Nucleotides and derivatives	3373-53-3	3	2.60695e+06	2.77619e+06	2.90905e+06	2.3267e+06	2.41799e+06	2.19871e+06	-	-
pmb0789	332.134	152.072	331.127	C14H21NO8	[M+H]+	Pyridoxine-5'-O-glucoside	Others	Vitamin	-	3	1.74296e+07	1.57722e+07	1.80036e+07	1.43477e+07	1.52694e+07	1.39163e+07	C03996	-
Hmlp003185	681.17	287.05	680.159	C30H32O18	[M+H]+	Luteolin-7-O-(6''-malonyl)glucoside-5-O-rhamnoside	Flavonoids	Flavones	-	3	5.24285e+06	4.78845e+06	4.74718e+06	2.892e+06	2.88012e+06	3.13107e+06	-	-
MWS2442	259.022	96.9688	260.03	C6H13O9P	[M-H]-	D-Fructose 6-Phosphate*	Others	Saccharides	643-13-0	1	242732	248758	235901	319552	316432	292493	C00085	ko00052,ko00500,ko00710,ko01100,ko01110,ko01200
MW0152192	486.27	130.09	487.275	C20H37N7O7	[M-H]-	Leu-Ala-Arg-Glu	Amino acids and derivatives	Amino acids and derivatives	-	3	365623	335215	378674	302103	318665	289717	-	-
Hmmp001541	298.11	136.06	297.1	C17H15NO4	[M+H]+	(E)-3-(3',5'-Dimethoxy-4'-hydroxy-benzylidene')-2-indolinone	Alkaloids	Plumerane	-	3	461122	395069	446596	365026	401692	385870	-	-
MWSmce501	167.036	108.025	168.042	C8H8O4	[M-H]-	Protocatechuic Acid Methyl Ester	Phenolic acids	Phenolic acids	2150-43-8	3	201388	172865	182503	211530	196394	215157	-	-
Hmqn003054	329.23	311.22	330.241	C18H34O5	[M-H]-	9,10,11-Trihydroxy-12-octadecenoic acid	Lipids	Free fatty acids	61911-67-9	1	1.12005e+06	1.21686e+06	1.30928e+06	1.05204e+06	1.14818e+06	1.14026e+06	-	-
Zmjn001813	159.066	97.0649	160.074	C7H12O4	[M-H]-	Pimelic acid*	Organic acids	Organic acids	111-16-0	3	187573	176642	198148	174411	165510	182199	C02656	ko00780,ko01100,ko01240
Cmmn005231	391.138	59.014	392.147	C20H24O8	[M-H]-	Massoniresinol; Vladinol A	Lignans and Coumarins	Lignans	96087-10-4	3	179780	168361	255563	178503	195799	191827	-	-
MWS201424	246.145	86.0967	245.138	C10H19N3O4	[M+H]+	Ile-Asn	Amino acids and derivatives	Amino acids and derivatives	59652-59-4	3	499695	545687	570260	468342	460647	503666	-	-
zjzp122816	289.071	215.07	288.063	C15H12O6	[M+H]+	5,7,2',4'-Tetrahydroxyflavanone	Flavonoids	Flavanones	-	3	739699	708841	705876	534926	588401	570494	-	-
pma0101	293.161	163.04	292.154	C14H20N4O3	[M+H]+	Caffeoylagmatine	Alkaloids	Phenolamine	-	3	223052	216126	234290	191757	207323	209825	-	-
MW0150961	645.31	601.34	644.314	C27H40N12O7	[M+H]+	His-His-Ser-Lys-His	Amino acids and derivatives	Amino acids and derivatives	-	3	2.20225e+06	2.02534e+06	2.30491e+06	1.81001e+06	1.67148e+06	1.66124e+06	-	-
pme3388	189.135	144.102	188.127	C7H16N4O2	[M+H]+	Homoarginine	Amino acids and derivatives	Amino acids and derivatives	156-86-5	3	856606	714880	914485	751934	818229	754335	C01924	-
MWS20169	269.046	254.021	270.053	C15H10O5	[M-H]-	2,5-dihydroxy-1-methoxy-anthraquinone	Quinones	Anthraquinone	-	3	52811	54708.8	53025.5	35107.3	38468.8	37932.8	-	-
Wafn002319	515.14	323.08	516.148	C22H28O14	[M-H]-	4-O-(3'-O-alpha-D-Glucopyranosyl)caffeoylquinic acid	Phenolic acids	Phenolic acids	1401352-63-3	1	1.80629e+06	1.71727e+06	1.53816e+06	1.57822e+06	1.43335e+06	1.48842e+06	-	-
mws4002	154.086	137.06	153.079	C8H11NO2	[M+H]+	Dopamine	Alkaloids	Phenolamine	51-61-6	3	1.7552e+06	1.952e+06	1.6415e+06	1.56898e+06	1.57981e+06	1.44505e+06	C03758	ko00350,ko00950,ko00965,ko01100,ko01110
mws0639	153.019	109.029	154.027	C7H6O4	[M-H]-	2,3-Dihydroxybenzoic Acid*	Phenolic acids	Phenolic acids	303-38-8	1	8.12773e+06	7.6567e+06	8.54973e+06	7.24087e+06	6.65792e+06	7.26938e+06	C00196	ko01110
MWSmce283	149.069	92.032	150.068	C9H10O2	[M-H]-	4'-Hydroxypropiophenone	Others	Ketone compounds	70-70-2	3	79020.7	70311.4	81310.1	72163.6	65434.9	69168.3	C13342	-
mws0853	209.082	179.07	210.089	C11H14O4	[M-H]-	Sinapyl alcohol*	Phenolic acids	Phenolic acids	537-33-7	3	657183	622305	615344	534878	520118	571618	C02325	ko00940,ko01100,ko01110
Jmwn002117	331.1	153.02	332.111	C14H20O9	[M-H]-	2-(3,4-dihydroxyphenyl)ethanediol 1-O-β-D-glucopyranoside	Phenolic acids	Phenolic acids	-	1	1.66305e+06	1.68808e+06	1.69061e+06	1.59317e+06	1.48042e+06	1.4541e+06	-	-
Wasn003200	385.08	209.03	386.085	C16H18O11	[M-H]-	O-Feruloylgalactaric acid	Phenolic acids	Phenolic acids	-	2	548049	689751	561382	446870	418364	460855	C03156	-
Lwhp010633	160.08	115.05	159.068	C10H9NO	[M+H]+	Echinopsine	Alkaloids	Quinoline alkaloids	83-54-5	2	5.23102e+06	4.77856e+06	5.35739e+06	4.50233e+06	4.16493e+06	4.1193e+06	-	-
Hmcp003783	211.087	193.07	210.079	C13H10N2O	[M+H]+	1-Acetyl-β-carboline	Alkaloids	Plumerane	-	3	1.1727e+06	1.32022e+06	1.23329e+06	1.36178e+06	1.49443e+06	1.39183e+06	-	-
mws0250	182.08	136.08	181.074	C9H11NO3	[M+H]+	L-Tyrosine*	Amino acids and derivatives	Amino acids and derivatives	60-18-4	1	5.61851e+06	5.53796e+06	5.85868e+06	4.9529e+06	4.53261e+06	4.57958e+06	C00082	ko00130,ko00261,ko00350,ko00360,ko00400,ko00460,ko00730,ko00940,ko00950,ko00965,ko00966,ko00970,ko00999,ko01100,ko01110,ko01210,ko01230,ko01240
MWS201437	247.13	86.1	246.122	C10H18N2O5	[M+H]+	Leu-Asp	Amino acids and derivatives	Amino acids and derivatives	32949-40-9	1	1.21539e+06	4.95572e+06	5.23338e+06	1.28043e+06	1.36242e+06	1.41197e+06	-	-
pme3968	166.072	149.046	165.065	C6H7N5O	[M+H]+	7-Methylguanine	Nucleotides and derivatives	Nucleotides and derivatives	578-76-7	3	3.14544e+06	3.00823e+06	2.89938e+06	2.58204e+06	2.37514e+06	2.37282e+06	C02242	-
mws0359	241.22	241.22	242.225	C15H30O2	[M-H]-	Pentadecanoic Acid	Lipids	Free fatty acids	1002-84-2	3	136247	215277	152082	235941	248126	260491	C16537	-
Lacp001431	268.15	136.06	267.147	C14H21NO4	[M+H]+	N-(3-hydroxy-4-methoxyphenethyl)-4-hydroxybutanamide	Alkaloids	Phenolamine	-	3	1.02842e+07	9.34438e+06	8.98934e+06	8.05611e+06	8.73833e+06	8.00244e+06	-	-
Lmsp003790	787.23	317.07	786.222	C34H42O21	[M+H]+	Isorhamnetin-3-O-sophoroside-7-O-rhamnoside	Flavonoids	Flavonols	41328-75-0	3	108380	515940	22162.1	53851.7	54115.3	49454.9	-	-
pmb0374	136.06	119.04	135.054	C5H5N5	[M+H]+	2-Aminopurine	Nucleotides and derivatives	Nucleotides and derivatives	452-06-2	1	1.50258e+07	1.20694e+07	1.27999e+07	1.13526e+07	1.03126e+07	1.06031e+07	-	-
Lmsn003628	547.17	223.06	548.174	C23H32O15	[M-H]-	6'-O-Sinapoylsucrose	Phenolic acids	Phenolic acids	-	3	1.18646e+06	1.08058e+06	1.10189e+06	1.00224e+06	1.10718e+06	1.06538e+06	-	-
Zmdn004104	233.05	189.06	234.053	C12H10O5	[M-H]-	2-methyl-5-carboxy methyl-7-Hydroxy-chromone	Others	Chromone	-	3	1.95016e+06	1.74742e+06	1.86304e+06	1.50301e+06	1.57568e+06	1.66068e+06	-	-
MWSmce257	218.11	88.04	219.111	C9H17NO5	[M-H]-	D-Pantothenic Acid	Others	Vitamin	79-83-4	1	5.10951e+06	4.86615e+06	5.07076e+06	3.95081e+06	4.33787e+06	4.28557e+06	C00864	ko00410,ko00770,ko01100,ko01110,ko01240
Labp006185	533.129	285.076	532.122	C25H24O13	[M+H]+	Acacetin-7-O-(6''-malonyl)glucoside	Flavonoids	Flavones	-	3	8.20716e+06	7.50824e+06	7.66467e+06	5.55894e+06	6.1288e+06	5.97634e+06	-	-
MWS1771	196.097	91.0546	195.089	C10H13NO3	[M+H]+	L-Tyrosine methyl ester	Amino acids and derivatives	Amino acids and derivatives	1080-06-4	3	250810	258295	213949	338571	335856	367299	C03404	-
MWS2910	242.113	126.066	241.106	C10H15N3O4	[M+H]+	5-Methyl-2'-Deoxycytidine	Nucleotides and derivatives	Nucleotides and derivatives	838-07-3	3	320783	324270	343833	349751	336374	316427	C03592	-
mws0262	149.009	87.0088	150.016	C4H6O6	[M-H]-	L-Tartaric acid	Organic acids	Organic acids	87-69-4	3	1.32024e+06	1.17289e+06	1.16302e+06	1.16202e+06	1.17969e+06	1.07306e+06	C00898	ko00630,ko01100
pma2987	142.097	124.087	141.09	C6H11N3O	[M+H]+	Histidinol	Alkaloids	Alkaloids	501-28-0	3	19199879	1.75842e+07	1.80974e+07	1.88796e+07	1.70797e+07	1.81968e+07	C00860	ko00340,ko01100,ko01110,ko01230
MW0112702	203.07	91.05	180.079	C10H12O3	[M+Na]+	3',4'-Dimethoxyacetophenone	Others	Ketone compounds	1131-62-0	3	3.5576e+06	3.42064e+06	4.36668e+06	1.88187e+06	1.70765e+06	1.8419e+06	-	-
Wcjp002598	146.06	91.05	145.053	C9H7NO	[M+H]+	8-hydroxyquinoline	Alkaloids	Quinoline alkaloids	148-24-3	1	2.19642e+07	1.89466e+07	2.29016e+07	1.90501e+07	1.72467e+07	1.85082e+07	C19434	-
HJN003	385.11	223.06	386.121	C17H22O10	[M-H]-	1-O-Sinapoyl-β-D-glucose	Phenolic acids	Phenolic acids	-	2	769588	854588	902945	794021	724317	789415	C01175	ko00940,ko01110
Zahp011689	205.09	149.02	204.079	C12H12O3	[M+H]+	2,2-dimethylchromene-6-carboxylic acid	Others	Others	34818-56-9	1	8.61189e+06	9.17792e+06	8.69582e+06	9.0107e+06	9.97361e+06	9.52709e+06	-	-
Lazn003953	539.21	491.19	540.221	C26H36O12	[M-H]-	Erythro-Guaiacylglycerol-β-dihydroconiferyl Ether glucoside	Lignans and Coumarins	Lignans	-	1	8.15532e+06	9.49915e+06	8.14336e+06	8.23193e+06	8.97003e+06	8.2194e+06	-	-
pme1292	167.035	123.045	168.042	C8H8O4	[M-H]-	Homogentisic acid	Phenolic acids	Phenolic acids	451-13-8	3	5.93992e+06	5.75175e+06	6.53775e+06	5.2527e+06	5.67543e+06	5.79219e+06	C00544	ko00130,ko00350,ko01100,ko01240
mws0147	117.056	59.0139	118.063	C5H10O3	[M-H]-	β-Hydroxyisovaleric acid	Organic acids	Organic acids	625-08-1	3	796506	750847	801118	755102	744887	817653	C20827	ko00280,ko01100
pmn001691	327.22	291.2	328.225	C18H32O5	[M-H]-	9,12,13-Trihydroxy-10,15-octadecadienoic acid	Lipids	Free fatty acids	-	1	1.13699e+07	1.10493e+07	1.19658e+07	9.57934e+06	1.04225e+07	9.52525e+06	-	-
MWS3136	167.04	108.028	168.042	C8H8O4	[M-H]-	4-Methoxysalicylic Acid	Phenolic acids	Phenolic acids	2237-36-7	3	430673	363979	409115	337887	364519	331057	-	-
mws0854	163.061	59.0139	164.069	C6H12O5	[M-H]-	Rhamnose*	Others	Saccharides	3615-41-6	3	343259	375211	355074	378128	413756	414607	C00507	ko00051,ko01100
Hmcn002743	417.15	181.04	418.163	C22H26O8	[M-H]-	Lirioresinol A	Lignans and Coumarins	Lignans	-	2	160528	161622	168121	136436	136936	124775	-	-
MWStz040	116.07	70.07	115.063	C5H9NO2	[M+H]+	Pterolactam	Alkaloids	Pyrrole alkaloids	38072-88-7	1	1.49267e+07	1.43336e+07	1.39911e+07	1.36757e+07	1.29881e+07	1.23199e+07	-	-
Lmgp002593	123.04	77.04	122.037	C7H6O2	[M+H]+	3-hydroxybenzaldehyde	Phenolic acids	Phenolic acids	100-83-4	2	2.10896e+06	1.932e+06	2.03793e+06	1.86834e+06	2.06382e+06	1.91678e+06	C03067	-
Lmtp002942	535.14	499.12	534.137	C25H26O13	[M+H]+	Apigenin-6,8-di-C-arabinoside*	Flavonoids	Flavones	-	1	1.20947e+07	1.09993e+07	1.15373e+07	7.52951e+06	8.34412e+06	8.09685e+06	-	-
MWSmce342	311.041	135.046	312.048	C13H12O9	[M-H]-	2-Caffeoyl-L-tartaric acid (Caftaric acid)	Phenolic acids	Phenolic acids	67879-58-7	3	123325	72179.8	121180	105763	106871	97013.3	-	-
MWS0434	287.2	269.21	288.209	C19H28O2	[M-H]-	Trans-dehydrorosinone	Others	Ketone compounds	53-43-0	3	583962	627468	597723	466678	516181	505023	-	-
pmb2928	331.067	313.057	332.074	C13H16O10	[M-H]-	Gallic acid-4-O-glucoside	Phenolic acids	Phenolic acids	84274-52-2	3	234444	231282	251274	171391	162338	154345	-	-
Wbmp001002	152.07	107.05	151.063	C8H9NO2	[M+H]+	4-methoxybenzamide	Alkaloids	Alkaloids	3424-93-9	3	674181	612155	698400	547003	506407	495281	-	-
pme1841	103.123	86.0964	102.116	C5H14N2	[M+H]+	Cadaverine	Alkaloids	Alkaloids	462-94-2	3	84486	63649.3	75114.8	88113.6	84671.8	79313.8	C01672	ko00310,ko00470,ko00480,ko00960,ko01100,ko01110
MWS4354	282.12	150.079	281.112	C11H15N5O4	[M+H]+	N6-methyladenosine	Nucleotides and derivatives	Nucleotides and derivatives	1867-73-8	3	302838	184951	214400	222014	207357	200249	-	-
MWSslk206	159.044	103.054	158.037	C10H6O2	[M+H]+	1,4-Naphthoquinone	Quinones	Quinones	130-15-4	3	2.29982e+06	2.38327e+06	2.55475e+06	2.01113e+06	1.95956e+06	1.81414e+06	C02617	-
MWSslk154	277.129	115.041	276.121	C12H20O7	[M+H]+	Triethyl citrate	Organic acids	Organic acids	77-93-0	3	91790	102439	78264	92686.6	84098.8	91912.8	-	-
mws0866	259.02	96.97	260.03	C6H13O9P	[M-H]-	D-Glucose 6-phosphate*	Others	Saccharides	56-73-5	1	188047	65544.9	200494	214375	238147	230158	C00092	ko00500,ko00524,ko00562,ko01100,ko01110
MWSHC20170	269.105	59.015	270.11	C13H18O6	[M-H]-	Phenylmethyl β-L-glucopyranoside	Phenolic acids	Phenolic acids	176018-22-7	3	144637	144348	139182	120161	120166	131582	-	-
MWSHC20102	197.08	151.04	196.074	C10H12O4	[M+H]+	3-Hydroxy-1-(4-Hydroxy-3-Methoxyphenyl)Propan-1-One	Phenolic acids	Phenolic acids	2196-18-1	3	1.89806e+06	1371580	1.85277e+06	1.54318e+06	1.71158e+06	1.66696e+06	-	-
mws0458	151.04	136.017	152.047	C8H8O3	[M-H]-	Vanillin; 4-Hydroxy-3-Methoxybenzaldehyde*	Others	Aldehyde compounds	121-33-5	3	1.58708e+06	1.59418e+06	1.63914e+06	1.65072e+06	1.48491e+06	1.55241e+06	C00755	ko00996,ko01100,ko01110
pmb2799	295.23	195.14	296.235	C18H32O3	[M-H]-	12,13-Epoxy-9-Octadecenoic Acid	Lipids	Free fatty acids	6799-85-5	1	672629	689146	705526	269713	285328	300159	C14826	ko00591,ko01100
MW0133725	219.07	177.05	218.058	C12H10O4	[M+H]+	4-Methylumbelliferyl acetate	Lignans and Coumarins	Coumarins	2747-05-9	3	2.09938e+06	1.79244e+06	1.85253e+06	1.80091e+06	1.6339e+06	1.65581e+06	C03837	-
mws0014	193.05	134.04	194.058	C10H10O4	[M-H]-	Ferulic acid*	Phenolic acids	Phenolic acids	537-98-4	1	7.45824e+06	6.46354e+06	6.21648e+06	5.10241e+06	5.66166e+06	5.27705e+06	C01494	ko00940,ko01100,ko01110
Lmsn002247	299.08	137.02	300.084	C13H16O8	[M-H]-	1-O-Salicyloyl-β-D-glucose	Phenolic acids	Phenolic acids	60517-74-0	1	974775	919680	979331	921047	839298	923386	-	-
mws2213	147.05	103.06	148.052	C9H8O2	[M-H]-	Cinnamic acid	Phenolic acids	Phenolic acids	140-10-3	2	186172	177628	183685	162467	154829	172261	C00423	ko00130,ko00360,ko00940,ko00996,ko00999,ko01100,ko01110
MWS1882	132.03	88.0403	133.037	C4H7NO4	[M-H]-	Iminodiacetic acid	Organic acids	Organic acids	142-73-4	3	574030	612890	612603	697238	648462	720917	C19911	-
pme0274	132.1	69.07	131.095	C6H13NO2	[M+H]+	6-Aminocaproic acid	Organic acids	Organic acids	60-32-2	2	1.33314e+06	1.13782e+06	1.35706e+06	1.01737e+06	1.12809e+06	1.04809e+06	C02378	ko01100
MWS5231	243.16	181.16	244.167	C13H24O4	[M-H]-	Tridecanedioic acid	Lipids	Free fatty acids	505-52-2	1	2.81803e+06	3.00869e+06	2.96343e+06	2.81151e+06	3.12919e+06	3.01241e+06	-	-
Hmmp004965	463.12	301.07	462.116	C22H22O11	[M+H]+	Diosmetin-7-O-glucoside*	Flavonoids	Flavones	20126-59-4	2	5.1762e+06	4.33363e+06	5.28001e+06	2.4371e+06	2.19376e+06	2.27415e+06	-	-
Zmxp005324	361.164	189.09	360.157	C20H24O6	[M+H]+	Dihydrodehydrodiconiferyl alcohol	Lignans and Coumarins	Lignans	126253-41-6	3	165590	214631	67080.3	211321	221844	199133	-	-
mws5045	215.165	169.159	216.173	C12H24O3	[M-H]-	12-Hydroxydodecanoic acid	Lipids	Free fatty acids	505-95-3	3	117727	109391	120072	196713	200466	217541	C08317	-
Zmgn004439	171.139	153.138	172.146	C10H20O2	[M-H]-	Decanoic acid	Organic acids	Organic acids	334-48-5	3	8924.28	8522.18	6679.62	12448.4	13109.4	13873.6	C01571	ko00061,ko01100
MWStz004	281.092	237.067	280.085	C16H12N2O3	[M+H]+	2-(1H-Indole-3-carboxamido)benzoic acid	Alkaloids	Plumerane	171817-95-1	3	127832	122321	123332	145423	159178	160737	-	-
Hmcn000192	209.07	59.01	210.074	C7H14O7	[M-H]-	Sedoheptulose	Others	Saccharides	3019-74-7	2	607510	725440	673502	614139	659038	592467	C02076	ko00710,ko01100
pmb3068	337.09	163.04	338.1	C16H18O8	[M-H]-	1-O-p-Coumaroylquinic acid	Phenolic acids	Phenolic acids	-	3	570733	571852	592882	523189	507160	469896	-	-
MWS3149	151.041	107.052	152.047	C8H8O3	[M-H]-	3-Methoxybenzoic acid	Phenolic acids	Phenolic acids	586-38-9	3	55922.3	62615	57925.5	64831.7	58815	59259	-	-
Zmdn004052	431.1	269.05	432.106	C21H20O10	[M-H]-	Aloe emodin-1-O-glucoside	Quinones	Anthraquinone	-	2	1.17001e+06	1.08988e+06	1.15583e+06	660871	606704	597418	-	-
pmp000194	519.11	271.06	518.106	C24H22O13	[M+H]+	6''-O-Malonylgenistin	Flavonoids	Isoflavones	51011-05-3	1	6.23541e+06	5.35527e+06	6.12945e+06	3.41749e+06	3.56381e+06	3.19188e+06	C16192	ko00943
MWSmce713	151.077	106.042	152.084	C9H12O2	[M-H]-	3-(4-Hydroxyphenyl)-1-propanol	Phenolic acids	Phenolic acids	10210-17-0	3	55925.5	44189.8	41393.2	38971.6	42862	43043.1	-	-
Lahp002797	183.06	123.04	182.058	C9H10O4	[M+H]+	Methyl Orsellinate	Phenolic acids	Phenolic acids	3187-58-4	1	1.99433e+06	2.22907e+06	2.01073e+06	1.86116e+06	2.05026e+06	1.87054e+06	-	-
pme0021	166.09	120.08	165.079	C9H11NO2	[M+H]+	L-Phenylalanine	Amino acids and derivatives	Amino acids and derivatives	63-91-2	1	968432	874322	963158	841275	833960	759809	C00079	ko00360,ko00400,ko00460,ko00470,ko00940,ko00960,ko00966,ko00970,ko00996,ko00999,ko01100,ko01110,ko01210,ko01230,ko02010
mws0251	127.05	110.024	126.043	C5H6N2O2	[M+H]+	Thymine	Nucleotides and derivatives	Nucleotides and derivatives	65-71-4	3	92683.1	76271.1	126740	108586	104411	97227	C00178	ko00240,ko01100,ko01232
pme1474	298.1	136.06	297.09	C11H15N5O3S	[M+H]+	5'-Deoxy-5'-(methylthio)adenosine	Nucleotides and derivatives	Nucleotides and derivatives	2457-80-9	1	8.9899e+06	6.96358e+06	7.44834e+06	5.69031e+06	5.67553e+06	6.24849e+06	C00170	ko00270,ko00908,ko01100
MWS0442	527.156	365.102	504.169	C18H32O16	[M+Na]+	Maltotriose	Others	Saccharides	1109-28-0	3	1.7709e+07	1.88792e+07	1.69518e+07	1.9558e+07	2.0447e+07	1.82952e+07	C01835	ko02010
MWSmce025	369.086	207.032	370.09	C16H18O10	[M-H]-	Fraxetin-8-O-glucoside (Fraxin)	Lignans and Coumarins	Coumarins	524-30-1	3	640482	695546	721167	644502	665655	596377	C09266	-
Lmcp003402	479.12	317.06	478.111	C22H22O12	[M+H]+	Tamarixetin-3-O-glucoside (Tamarixin)	Flavonoids	Flavonols	27542-39-8	3	4.63075e+06	2.97418e+06	3.80558e+06	3.19009e+06	3.5586e+06	3.31407e+06	-	-
pme3140	175.04	147.05	176.047	C10H8O3	[M-H]-	6-Hydroxy-4-methylcoumarin	Lignans and Coumarins	Coumarins	2373-31-1	3	1.24689e+06	1.32881e+06	1.3325e+06	1.30988e+06	1.36509e+06	1.46219e+06	-	-
pmb0501	131.129	114.103	130.122	C5H14N4	[M+H]+	Agmatine	Alkaloids	Alkaloids	306-60-5	3	140981	133855	177973	142108	141503	128504	C00179	ko00330,ko01100
MW0139750	607.16	443.1	608.174	C28H32O15	[M-H]-	Spinosin	Flavonoids	Flavones	72063-39-9	3	4.69998e+06	4.10182e+06	4.2164e+06	3.91343e+06	4.36955e+06	4.22785e+06	C17834	-
Zmjp000966	268.11	136.06	267.097	C10H13N5O4	[M+H]+	Vidarabine	Nucleotides and derivatives	Nucleotides and derivatives	5536-17-4	1	8.37209e+06	8.40095e+06	8.36575e+06	7.58823e+06	6.78483e+06	7.26753e+06	-	-
Hamp011640	256.264	102.091	255.256	C16H33NO	[M+H]+	palmitic amide	Others	Others	-	3	235828	160015	248817	1.21943e+06	1.2053e+06	1.09866e+06	-	-
MWSHY0189	433.113	271.066	432.106	C21H20O10	[M+H]+	Apigenin-7-O-glucoside(Cosmosiin)*	Flavonoids	Flavones	578-74-5	3	371108	327680	501442	244827	228436	255680	C04608	ko00944
Qmyp101119	235.17	133.1	234.162	C15H22O2	[M+H]+	Procurcumenol	Terpenoids	Sesquiterpenoids	21698-40-8	2	538829	532290	587039	493943	441372	473945	-	-
Wbmn013660	335.22	253.22	336.23	C20H32O4	[M-H]-	3,9-Dihydroxy-13(14)-labden-16,15-olide	Terpenoids	Ditepenoids	-	1	357697	462896	566790	254275	253252	279446	-	-
Zajn002491	451.12	289.07	452.132	C21H24O11	[M-H]-	catechin-4-β-D-galactopyranoside	Flavonoids	Flavanols	-	1	599649	510044	489650	448538	439214	488082	-	-
MW0155368	409.18	145.06	408.18	C22H24N4O4	[M+H]+	Phe-Trp-Gly	Amino acids and derivatives	Amino acids and derivatives	-	3	655066	692071	668309	549296	600219	611705	-	-
Lmmn004032	163.11	148.06	164.12	C11H16O	[M-H]-	Cis-Jasmone	Others	Ketone compounds	488-10-8	3	249558	227355	232171	200039	220448	200170	C08490	-
mws0263	128.035	82.0298	129.043	C5H7NO3	[M-H]-	5-Oxo-L-Proline*	Amino acids and derivatives	Amino acids and derivatives	98-79-3	3	64138.4	69133.9	58525.1	54088.3	50743.6	56864.7	C01879	ko00480,ko01100
Hmgn002038	637.18	475.14	638.185	C29H34O16	[M-H]-	β-Oxoacteoside	Phenolic acids	Phenolic acids	-	3	2.53167e+06	2.58737e+06	2.33756e+06	2.15044e+06	2.2653e+06	2.02127e+06	-	-
Lmfn004093	435.13	315.088	436.137	C21H24O10	[M-H]-	Phloretin-4'-O-glucoside (Trilobatin)	Flavonoids	Chalcones	4192-90-9	3	197933	165019	178342	107764	108103	97637.6	-	-
MWS201419	204.134	84.0816	203.127	C8H17N3O3	[M+H]+	Lys-Gly	Amino acids and derivatives	Amino acids and derivatives	7563-03-3	3	8.62527e+06	9.32479e+06	9.14689e+06	7.64817e+06	8.40092e+06	8.50273e+06	-	-
pme3184	332.08	136.06	331.068	C10H14N5O6P	[M+H]+	2'-Deoxyadenosine-5'-monophosphate	Nucleotides and derivatives	Nucleotides and derivatives	653-63-4	3	4.24407e+06	3.95744e+06	4.38165e+06	3.89181e+06	3.53395e+06	3.92191e+06	C00360	ko00230,ko01100,ko01232
mws1397	441.083	169.016	442.09	C22H18O10	[M-H]-	Epicatechin gallate*	Flavonoids	Flavanols	1257-08-5	3	191939	168972	238534	221088	246040	226129	-	-
Wmhn001575	337.06	175.02	338.1	C16H18O8	[M-H]-	1,4,8-Trihydroxynaphthalene-1-O-glucoside	Quinones	Quinones	-	3	446958	535587	660054	483851	540263	499940	-	-
pme0256	151.026	108.02	152.033	C5H4N4O2	[M-H]-	Xanthine	Nucleotides and derivatives	Nucleotides and derivatives	69-89-6	3	427629	381140	457427	400343	385209	430826	C00385	ko00230,ko00232,ko01100,ko01110,ko01232
MWSslk080	187.132	141.128	188.141	C10H20O3	[M-H]-	10-Hydroxydecanoic acid	Lipids	Free fatty acids	1679-53-4	3	41786.4	43752.2	43964	79388.3	88455.2	81223.1	C02774	-
MWSslk042	126.054	80.0125	125.048	C6H7NO2	[M+H]+	N-Ethylmaleimide (NEM)	Amino acids and derivatives	Amino acids and derivatives	128-53-0	3	86169.7	101031	106633	91746.5	89759.9	100010	C02441	-
MWSHC20155	191.04	176.01	192.042	C10H8O4	[M-H]-	Scopoletin (7-Hydroxy-6-methoxycoumarin)	Lignans and Coumarins	Coumarins	92-61-5	1	354573	350677	356019	338123	309571	303788	C01752	ko00999,ko01110
ML10171848	147.03	85.03	148.037	C5H8O5	[M-H]-	D-Arabinono-1,4-lactone*	Others	Saccharides	2782-09-4	1	1.01994e+06	979232	1.00223e+06	880571	806671	790828	C00652	ko00053,ko01100
MWS1875	143.05	115.055	144.058	C10H8O	[M-H]-	2-Naphthol*	Phenolic acids	Phenolic acids	135-19-3	3	12990.6	44586.9	10484.4	13993.4	14731.6	13115.1	C11713	-
Lafp007563	219.17	121.1	218.167	C15H22O	[M+H]+	Costal	Terpenoids	Sesquiterpenoids	-	3	372666	377129	400185	336019	371783	372958	-	-
mws1587	132.1	86.1	131.095	C6H13NO2	[M+H]+	L-Norleucine*	Amino acids and derivatives	Amino acids and derivatives	327-57-1	1	7.26448e+06	6.58145e+06	7.53507e+06	6.0897e+06	6.5458e+06	5.83713e+06	C01933	-
pme2237	181.072	101.024	182.079	C6H14O6	[M-H]-	Dulcitol*	Others	Saccharides	608-66-2	3	213082	233731	200463	269574	272866	244807	C01697	ko00052,ko01100
MWSmce165	165.08	59.02	166.084	C6H14O5	[M-H]-	L-Fucitol	Others	Saccharides	13074-06-1	3	2.97617e+06	3.2897e+06	3.09842e+06	3.03277e+06	3.40918e+06	3.21814e+06	-	-
zjzp122708	397.164	269.042	396.157	C23H24O6	[M+H]+	Cudraxanthone J	Flavonoids	Other Flavonoids	-	3	24286	20741.9	29881	31623.1	29502	33168.1	-	-
MWSslk097	195.06	163.04	194.058	C10H10O4	[M+H]+	Dimethyl phthalate	Phenolic acids	Phenolic acids	131-11-3	1	2.6626e+07	2.58961e+07	2.56941e+07	2.76217e+07	2.56778e+07	2.88659e+07	C11233	-
MWSmce387	183.03	124.02	184.037	C8H8O5	[M-H]-	3-O-Methylgallic acid	Phenolic acids	Phenolic acids	3934-84-7	3	47287.9	38691.2	36603.4	43009.9	39705.2	44590.4	C05616	-
MW0150178	481.21	289.06	480.201	C25H28N4O6	[M+H]+	Glu-Trp-Phe	Amino acids and derivatives	Amino acids and derivatives	-	3	2.81497e+07	65372930	2.70605e+07	2.46539e+07	2.32675e+07	2.61814e+07	-	-
MWSHC20121	225.15	97.06	224.141	C13H20O3	[M+H]+	(3E)-4-[(1R,3S,6R)-3-Hydroxy-5,5,6-trimethyl-7-oxabicyclo[4.1.0]hept-1-yl]-3-buten-2-one	Others	Others	1416779-58-2	1	275186	239757	319197	293068	323434	291453	-	-
pme1119	269.088	137.046	268.081	C10H12N4O5	[M+H]+	Inosine	Nucleotides and derivatives	Nucleotides and derivatives	58-63-9	3	291970	231860	108598	113822	104550	117482	C00294	ko00230,ko01100,ko01232,ko02010
pmb0782	86.0964	69.0698	85.0891	C5H11N	[M+H]+	Piperidine	Alkaloids	Piperidine alkaloids	110-89-4	3	1.56172e+07	1.55514e+07	1.55406e+07	1.45405e+07	12939906	1.41246e+07	C01746	ko00960
Lmdn006074	223.1	179.11	224.105	C12H16O4	[M-H]-	Senkyunolide I	Others	Lactones	94596-28-8	3	199070	213462	191548	213346	239776	232904	-	-
mws0748	353.09	191.06	354.095	C16H18O9	[M-H]-	1-Caffeoylquinic acid	Phenolic acids	Phenolic acids	1241-87-8	1	5.31951e+06	4.76907e+06	5.65844e+06	4.35918e+06	4.15615e+06	3.86624e+06	-	-
YC512118	282.279	247.243	281.272	C18H35NO	[M+H]+	Oleamide (9-Octadecenamide)	Lipids	Free fatty acids	301-02-0	1	202025	102769	194429	803448	854478	757770	C19670	-
Hahn001170	345.118	183.069	346.126	C15H22O9	[M-H]-	Aucubin	Terpenoids	Sesquiterpenoids	479-98-1	3	819593	715936	719386	717644	688537	774409	C09771	-
MWS4471	173.057	58.0297	174.064	C6H10N2O4	[M-H]-	N-Alpha-Acetyl-L-Asparagine	Amino acids and derivatives	Amino acids and derivatives	4033-40-3	3	199987	235000	200548	186334	201117	210075	-	-
mws1015	339.072	177.019	340.079	C15H16O9	[M-H]-	Esculin (6,7-Dihydroxycoumarin-6-O-glucoside)*	Lignans and Coumarins	Coumarins	531-75-9	1	1.38735e+06	1.39555e+06	1.30239e+06	1.20081e+06	1.28558e+06	1.13995e+06	C09264	-
MWS1792	74.0964	57.069	73.0891	C4H11N	[M+H]+	Butylamine	Alkaloids	Alkaloids	109-73-9	3	95035	105045	93370	123390	125060	111715	-	-
MWS201471	310.176	84.0811	309.169	C15H23N3O4	[M+H]+	Lys-Tyr	Amino acids and derivatives	Amino acids and derivatives	35978-98-4	3	621301	398649	508928	619560	551841	606653	-	-
MW0155818	417.18	373.19	416.17	C20H24N4O6	[M+H]+	Pro-Asp-Trp	Amino acids and derivatives	Amino acids and derivatives	-	3	2.71802e+06	2.73201e+06	2.71965e+06	2.76972e+06	2.99755e+06	2.66374e+06	-	-
MWStz063	170.154	152.144	169.147	C10H19NO	[M+H]+	2-Ethyl-2,6,6-trimethylpiperidin-4-one	Alkaloids	Piperidine alkaloids	133568-79-3	3	929801	896302	988462	749832	816593	727313	-	-
Wayn002636	365.13	203.08	366.142	C17H22N2O7	[M-H]-	N-(1-Deoxy-1-fructosyl)Tryptophan	Nucleotides and derivatives	Nucleotides and derivatives	-	1	1.82221e+06	2.22314e+06	1.98366e+06	1.91308e+06	2.0181e+06	2.15905e+06	-	-
Wbjp000520	146.08	82.06	145.074	C6H11NO3	[M+H]+	4-Hydroxypipecolic acid	Alkaloids	Alkaloids	14228-16-1	1	1.51963e+07	1.44939e+07	1.46273e+07	1.54398e+07	14848449	1.36863e+07	-	-
MW0153005	618.31	306.07	617.302	C25H43N7O11	[M+H]+	Lys-Ile-Asp-Asn-Glu	Amino acids and derivatives	Amino acids and derivatives	-	3	33044.7	64619.4	77558.9	78073.1	76044.1	85300.8	-	-
Lmqn000351	325.11	59.01	326.121	C12H22O10	[M-H]-	Rutinose	Others	Saccharides	90-74-4	3	317600	244555	278438	262975	232931	252128	C08247	-
pme3443	207.066	192.041	208.074	C11H12O4	[M-H]-	Sinapinaldehyde	Phenolic acids	Phenolic acids	4206-58-0	3	380142	409142	408516	369005	331581	333611	C05610	ko00940,ko01100,ko01110
Wccp011838	282.279	69.0696	281.272	C18H35NO	[M+H]+	Octadec-8-enamide	Alkaloids	Alkaloids	-	3	1.06669e+06	525215	1.00159e+06	4.29216e+06	4.39762e+06	3.90974e+06	-	-
Lmbn002644	119.05	93.03	120.058	C8H8O	[M-H]-	4-Methylbenzaldehyde*	Others	Aldehyde compounds	104-87-0	2	4.34182e+06	4.19545e+06	4.132e+06	3.58004e+06	3.86097e+06	4.04469e+06	C06758	ko01100
Lmbn002737	119.05	93.03	120.058	C8H8O	[M-H]-	3-Methylbenzaldehyde*	Others	Aldehyde compounds	620-23-5	2	4.34182e+06	4.19545e+06	4.132e+06	3.58004e+06	3.86097e+06	4.04469e+06	C07209	ko01100
MWS2984	153.052	136.026	152.045	C4H4N6O	[M+H]+	8-Azaguanine	Nucleotides and derivatives	Nucleotides and derivatives	134-58-7	3	636527	488465	615528	521384	581258	526397	-	-
mws1648	111.045	69.0333	112.052	C6H8O2	[M-H]-	Cyclohexane-1,3-dione	Others	Ketone compounds	504-02-9	3	67337.7	85975.6	51271	67201	74091.9	66350.2	C01066	-
Lazn002600	439.16	195.07	440.168	C21H28O10	[M-H]-	Erythro-Guaiacylglycerol-β-threo-syringylglycerol Ether	Lignans and Coumarins	Lignans	1313434-74-0	2	906984	779544	889246	783502	877443	799140	-	-
pmb0550	449.11	287.06	449.108	C21H21O11+	[M]+	Cyanidin-3-O-glucoside (Kuromanin)	Flavonoids	Anthocyanidins	47705-70-4	3	1.14871e+06	1995555	1.34184e+06	1.07561e+06	1.0038e+06	1.13537e+06	C08604	ko00942,ko01110
Wasn007177	303.05	183.03	304.058	C15H12O7	[M-H]-	3-O-Hydroxybenzoyl Methylgallate	Phenolic acids	Phenolic acids	-	3	321122	292821	314102	298749	272198	266545	-	-
pme2596	184.06	148.039	183.053	C8H9NO4	[M+H]+	4-Pyridoxic acid	Others	Vitamin	82-82-6	3	280200	245479	388199	238467	218808	247020	C00847	ko00750,ko01100
Sacn002893	403.12	223.06	404.132	C17H24O11	[M-H]-	10-acetylmonomelittoside	Phenolic acids	Phenolic acids	-	3	402633	431605	407850	397331	389536	436428	-	-
MWS201397	231.134	86.0606	230.127	C10H18N2O4	[M+H]+	Hyp-Val	Amino acids and derivatives	Amino acids and derivatives	-	3	277581	270238	269496	354242	362471	322089	-	-
pmb0530	664.116	136.062	663.109	C21H27N7O14P2	[M+H]+	Nicotinic acid adenine dinucleotide	Nucleotides and derivatives	Nucleotides and derivatives	53-84-9	1	942778	851085	942818	882417	998833	939497	C00003	ko00190,ko00730,ko00760,ko01100,ko01240
Zajp000573	144.101	84.0805	143.095	C7H13NO2	[M+H]+	N-(4-oxopentyl)-acetamide*	Alkaloids	Alkaloids	-	3	1.20555e+06	1.28721e+06	1.28183e+06	1.14518e+06	1.11111e+06	1.25073e+06	-	-
MWSslk237	463.125	301.07	462.116	C22H22O11	[M+H]+	Hispidulin-7-O-glucoside(Homoplantaginin)*	Flavonoids	Flavones	17680-84-1	2	5.76012e+06	4.19793e+06	6.23258e+06	2.25869e+06	2.2129e+06	2.48341e+06	C17762	-
MW0009415	135.05	89.04	136.052	C8H8O2	[M-H]-	Phenylacetic acid	Organic acids	Organic acids	103-82-2	3	507092	475411	466297	437733	400862	388626	C07086	ko00360,ko01100
MWSHC2025	217.1	144.08	216.09	C12H12N2O2	[M+H]+	(R)-1,2,3,4-Tetrahydro-3-carboxy-2-carboline	Alkaloids	Alkaloids	72002-54-1	1	1.12635e+07	1.02563e+07	1.11257e+07	9.70448e+06	9.18352e+06	1.04011e+07	-	-
mws1336	138.055	120.044	137.048	C7H7NO2	[M+H]+	4-Aminobenzoic acid	Phenolic acids	Phenolic acids	150-13-0	3	283205	581190	316187	308612	306263	275284	C00568	ko00790,ko01100,ko01240
mws0847	150.08	133.05	149.07	C6H7N5	[M+H]+	1-Methyladenine	Nucleotides and derivatives	Nucleotides and derivatives	5142-22-3	3	1.41324e+06	1.09319e+06	1.10613e+06	971765	1.08503e+06	978601	C02216	-
mws0267	105.02	105.02	106.027	C3H6O4	[M-H]-	DL-Glyceric Acid	Organic acids	Organic acids	473-81-4	1	2.01114e+06	2.01744e+06	1.94618e+06	1.62022e+06	1.80877e+06	1.81359e+06	C00258	ko00030,ko00260,ko00561,ko00630,ko01100,ko01110,ko01200
pmn001644	519.08	300	520.085	C23H20O14	[M-H]-	Quercetin-3-O-(2''-O-acetyl)glucuronide	Flavonoids	Flavonols	-	3	490025	384406	523217	298374	293689	264972	-	-
Zmpn000638	130.05	88.0413	131.07	C4H9N3O2	[M-H]-	3-Guanidinopropionic acid	Organic acids	Organic acids	353-09-3	3	396719	338522	424257	271132	298300	306479	C03065	-
Lmyn008503	143.11	143.11	144.115	C8H16O2	[M-H]-	Octanoic acid	Lipids	Free fatty acids	124-07-2	3	26119	25633.8	27950.7	35665	33294.6	31431.2	C06423	ko00061,ko00785,ko01100,ko01240
Cmsp006710	275.128	137.059	274.12	C16H18O4	[M+H]+	3',4-Dihydroxy-3,5'-dimethoxybibenzyl	Others	Stilbene	83088-28-2	3	142712	164033	163330	139515	153758	136745	-	-
mws0027	197.046	123.009	198.053	C9H10O5	[M-H]-	Syringic acid	Phenolic acids	Phenolic acids	530-57-4	3	395543	398536	393966	332750	377291	363574	C10833	-
pme0193	147.08	84.04	146.069	C5H10N2O3	[M+H]+	L-Glutamine	Amino acids and derivatives	Amino acids and derivatives	56-85-9	1	2.33832e+07	2.29547e+07	2.27016e+07	2.44146e+07	2.37601e+07	2.1583e+07	C00064	ko00220,ko00230,ko00240,ko00250,ko00470,ko00630,ko00750,ko00910,ko00970,ko01100,ko01230,ko01232,ko01240,ko02010
pmb0863	492.308	184.073	491.301	C24H46NO7P	[M+H]+	LysoPC 16:2(2n isomer)	Lipids	LPC	-	3	105330	119495	104301	71019	62603.7	65890.7	-	-
Wagp002530	177.06	117.03	176.047	C10H8O3	[M+H]+	2-Methoxy-1-benzofuran-5-carbaldehyde	Others	Others	-	2	2.22017e+06	1.97895e+06	2.28851e+06	1.98849e+06	1.7776e+06	1.79079e+06	-	-
mws1608	447.09	357.06	448.101	C21H20O11	[M-H]-	Luteolin-6-C-glucoside (Isoorientin)	Flavonoids	Flavones	4261-42-1	1	3.26697e+07	2.96311e+07	3.53139e+07	1.71705e+07	1.88032e+07	1.9466e+07	C01821	-
pme0014	148.06	84.0444	147.053	C5H9NO4	[M+H]+	L-Glutamic acid	Amino acids and derivatives	Amino acids and derivatives	56-86-0	1	1.9656e+07	2.07729e+07	1.85438e+07	2.12138e+07	1.92746e+07	2.18176e+07	C00025	ko00220,ko00250,ko00330,ko00332,ko00340,ko00430,ko00470,ko00480,ko00524,ko00630,ko00650,ko00660,ko00860,ko00910,ko00970,ko01100,ko01110,ko01200,ko01210,ko01230,ko01240,ko02010
Zmdp002216	261.14	86.1	260.137	C11H20N2O5	[M+H]+	L-γ-Glutamyl-L-leucine	Amino acids and derivatives	Amino acids and derivatives	2566-39-4	1	5.11449e+06	4.56281e+06	4.54891e+06	4.07466e+06	4.57071e+06	4.55482e+06	-	-
MW0108826	261.14	86.1	260.137	C11H20N2O5	[M+H]+	h-gamma-Glu-leu-oh	Amino acids and derivatives	Amino acids and derivatives	-	3	5.11449e+06	4.56281e+06	4.54891e+06	4.07466e+06	4.57071e+06	4.55482e+06	-	-
pme0282	165.019	77.0397	166.027	C8H6O4	[M-H]-	Phthalic acid	Phenolic acids	Phenolic acids	88-99-3	3	109674	97309	79336.5	103481	106139	93822.7	C01606	ko01100,ko02010
Wasn002329	366.08	160.04	367.09	C16H17NO9	[M-H]-	Xanthurenic Acid 8-O-Glucoside	Alkaloids	Quinoline alkaloids	97451-32-6	1	8.59249e+06	7.71957e+06	8.21947e+06	6.79687e+06	7.20373e+06	6.33453e+06	-	-
MWStz205	245.129	120.084	244.121	C14H16N2O2	[M+H]+	Cyclo(D-Phe-L-Pro)*	Amino acids and derivatives	Amino acids and derivatives	26488-24-4	3	192002	235876	166925	194332	208894	221023	-	-
Wayp001104	344.13	182.08	343.126	C15H21NO8	[M+H]+	N-(1-Deoxy-1-fructosyl)Tyrosine	Nucleotides and derivatives	Nucleotides and derivatives	-	3	2.56071e+06	2.98337e+06	3.04893e+06	2.19328e+06	2.41956e+06	2.48328e+06	-	-
MWS5173	112.05	70.0284	111.043	C4H5N3O	[M+H]+	Isocytosine	Nucleotides and derivatives	Nucleotides and derivatives	108-53-2	3	464593	448248	463122	397150	352485	392386	-	-
MWS201443	234.145	84.0812	233.138	C9H19N3O4	[M+H]+	Ser-Lys	Amino acids and derivatives	Amino acids and derivatives	22677-61-8	3	1.40337e+06	1.36218e+06	1.44116e+06	1.44291e+06	1.42351e+06	1.27978e+06	-	-
MWS201447	237.124	120.086	236.116	C12H16N2O3	[M+H]+	Phe-Ala	Amino acids and derivatives	Amino acids and derivatives	3918-87-4	1	269586	223462	224702	238347	210124	219609	-	-
Cmzn005251	433.11	271.06	434.121	C21H22O10	[M-H]-	6-O-Caffeoylarbutin	Phenolic acids	Phenolic acids	136172-60-6	2	552296	491588	493858	483618	425883	447311	-	-
mws0258	132.102	86.0964	131.095	C6H13NO2	[M+H]+	L-Isoleucine*	Amino acids and derivatives	Amino acids and derivatives	73-32-5	1	6.32735e+06	5.57764e+06	6.0664e+06	4.9029e+06	5.43682e+06	4.8439e+06	C00407	ko00280,ko00290,ko00460,ko00960,ko00966,ko00970,ko01100,ko01110,ko01210,ko01230,ko02010
MW0159003	675.32	513.27	674.302	C30H42N8O10	[M+H]+	Val-Glu-Tyr-His-Gln	Amino acids and derivatives	Amino acids and derivatives	-	3	475452	381184	365671	366852	331796	375494	-	-
MW0156753	542.26	146.06	541.25	C22H35N7O9	[M+H]+	Ser-Gly-Glu-Leu-His	Amino acids and derivatives	Amino acids and derivatives	-	3	528659	578173	589543	473648	536258	523873	-	-
Wasn000528	337.08	277.06	338.085	C12H18O11	[M-H]-	2-O-α-D-Glucopyranosyl-L-ascorbic acid	Others	Vitamin	129499-78-1	1	3.39886e+06	3.66386e+06	3.86667e+06	3.20315e+06	3.13277e+06	2.82967e+06	C18339	-
pme0422	193.051	134.037	194.058	C10H10O4	[M-H]-	Isoferulic Acid*	Phenolic acids	Phenolic acids	25522-33-2	1	6.38352e+06	6.5607e+06	6.98044e+06	5.19565e+06	5.76943e+06	5.13877e+06	C10470	-
MWSslk177	330.12	168.07	329.111	C14H19NO8	[M+H]+	Lithospermoside	Alkaloids	Alkaloids	63492-69-3	3	451826	431326	478775	373328	417705	374633	C17771	-
mws0341	131.071	85.0659	132.079	C6H12O3	[M-H]-	2-Hydroxyisocaproic acid	Organic acids	Organic acids	20312-37-2	3	580922	771622	661865	777655	722196	822833	C03264	-
Zmjn004133	311.223	293.214	312.23	C18H32O4	[M-H]-	9S-Hydroperoxy-10E,12Z-octadecadienoic acid	Lipids	Free fatty acids	5502-91-0	3	1.29297e+06	1.09613e+06	1.3529e+06	1.0343e+06	1.01944e+06	915959	C14827	ko00591,ko01100
Lmdp002381	227.09	149.06	226.084	C11H14O5	[M+H]+	Genipin	Terpenoids	Monoterpenoids	6902-77-8	3	171508	164558	163988	214750	188574	200145	C09780	-
Lmhp008833	494.32	184.07	493.317	C24H48NO7P	[M+H]+	LysoPC 16:1(2n isomer)	Lipids	LPC	-	1	420232	363627	424373	118860	124916	135166	-	-
ML10181668	130.09	84.08	129.079	C6H11NO2	[M+H]+	Cycloleucine	Amino acids and derivatives	Amino acids and derivatives	52-52-8	1	6.22322e+06	5.78241e+06	6.49995e+06	5.90189e+06	5.28061e+06	5.28114e+06	C03969	-
Lmsn002288	503.14	341.09	504.148	C21H28O14	[M-H]-	1-O-Caffeoyl-(6-O-glucosyl)-β-D-glucose	Phenolic acids	Phenolic acids	-	2	373477	392473	459283	365641	342661	390676	-	-
mws0139	175.04	147.05	176.047	C10H8O3	[M-H]-	7-Hydroxy-4-methylcoumarin	Lignans and Coumarins	Coumarins	90-33-5	3	671087	618788	685113	588875	645781	669976	C03081	-
zjgp122326	286.092	124.039	285.085	C12H15NO7	[M+H]+	Pyridine-4-formyl-O-β-D-glucopyranoside	Others	Others	-	1	233060	273956	323527	234491	265819	259928	-	-
MWSmce609	134.044	74.0237	133.037	C4H7NO4	[M+H]+	L-Aspartic acid	Amino acids and derivatives	Amino acids and derivatives	56-84-8	3	3.46588e+06	1.21799e+06	1.13787e+06	1.41998e+06	1.43191e+06	1.26991e+06	C00049	ko00220,ko00250,ko00260,ko00261,ko00270,ko00300,ko00340,ko00410,ko00460,ko00470,ko00710,ko00760,ko00770,ko00970,ko00999,ko01100,ko01110,ko01200,ko01210,ko01230,ko01240,ko02010
MWSmce557	151.085	109.075	150.079	C8H10N2O	[M+H]+	2-Acetyl-3-ethylpyrazine	Alkaloids	Alkaloids	32974-92-8	3	221234	153962	194143	191343	189706	213020	-	-
pmb0323	251.139	163.04	250.132	C13H18N2O3	[M+H]+	N-Caffeoylputrescine	Alkaloids	Phenolamine	29554-26-5	3	1.39879e+06	1.35656e+06	1.34549e+06	1.12145e+06	1.27526e+06	1.23429e+06	C03002	-
Ymjm000152	271.08	108.02	272.09	C12H16O7	[M-H]-	p-Hydroxypheny-β-D-allopyranoside	Phenolic acids	Phenolic acids	-	1	489145	465075	596529	413662	439271	384835	-	-
pmb1912	474.173	327.12	473.166	C20H23N7O7	[M+H]+	10-Formyltetrahydrofolic Acid	Alkaloids	Alkaloids	2800-34-2	3	3.00765e+06	2.84088e+06	3.12759e+06	2.30656e+06	2.47621e+06	2.63335e+06	C00234	ko00670,ko00970,ko01100,ko01200,ko01240
mws0601	110.025	66.0349	111.032	C5H5NO2	[M-H]-	Pyrrole-2-carboxylic acid	Organic acids	Organic acids	634-97-9	3	99458.2	88853.6	101114	85314.5	82250.5	93384	C05942	ko00470
Lmqp000427	146.08	82.07	145.074	C6H11NO3	[M+H]+	N-Methyl-Trans-4-Hydroxy-L-Proline	Amino acids and derivatives	Amino acids and derivatives	4252-82-8	2	1.60036e+07	1.61102e+07	1.63268e+07	1.59668e+07	1.63313e+07	1.43921e+07	-	-
Lmhn002926	279.05	163.04	280.058	C13H12O7	[M-H]-	p-Coumaroylmalic acid	Phenolic acids	Phenolic acids	-	1	4.10483e+06	3.14832e+06	4.2974e+06	3.80496e+06	4.03387e+06	3.53195e+06	-	-
MWSmce573	149.061	105.071	150.068	C9H10O2	[M-H]-	3,4-Dimethylbenzoic acid	Phenolic acids	Phenolic acids	619-04-5	3	20709.9	19649	19937.2	28195.2	25076.4	25307.8	-	-
pmb2586	593.13	285.6	594.137	C30H26O13	[M-H]-	Gallocatechin-(4α→8)-catechin	Flavonoids	Flavanols	-	3	98633.3	9366.8	90745.1	79011	81110.8	71372.7	-	-
Ladp002110	206.04	160.04	205.037	C10H7NO4	[M+H]+	4-hydroxy-2-oxo-1,2-dihydroquinoline-3-carboxylic acid	Alkaloids	Quinoline alkaloids	73776-24-6	1	776797	674479	751817	457623	522359	485731	-	-
MWSmce116	252.1	136.06	251.102	C10H13N5O3	[M+H]+	5'-Deoxyadenosine	Nucleotides and derivatives	Nucleotides and derivatives	4754-39-6	3	381661	376168	422284	327918	365600	325091	C05198	-
Zmjp000182	189.134	70.0652	188.127	C7H16N4O2	[M+H]+	N-Monomethyl-L-arginine*	Amino acids and derivatives	Amino acids and derivatives	17035-90-4	3	1.94362e+06	1.98077e+06	2.12874e+06	1.97139e+06	1.72971e+06	1.81551e+06	C03884	-
Lmbn014696	301.217	301.217	302.225	C20H30O2	[M-H]-	Pimaric acid*	Terpenoids	Ditepenoids	127-27-5	3	462106	360582	248918	388225	430113	441388	C09159	-
Zmhn001746	405.12	243.07	406.126	C20H22O9	[M-H]-	Piceatannol-3'-O-glucoside	Others	Stilbene	94356-26-0	3	303749	292434	348666	385163	346016	341818	-	-
MWSHC2054	136.06	119.04	135.054	C5H5N5	[M+H]+	Adenine	Nucleotides and derivatives	Nucleotides and derivatives	73-24-5	1	2.98459e+06	2.63815e+06	2.9749e+06	2.32643e+06	2.6608e+06	2.50539e+06	C00147	ko00230,ko00908,ko01100,ko01110,ko01232
Zbjn003642	499.15	191.06	500.155	C22H28O13	[M-H]-	1-O-rhamnose-3-O-Caffeoyl Quinic Acid	Phenolic acids	Phenolic acids	-	3	36675	134394	140180	99412	109002	113504	-	-
Lmlp002765	229.123	201.128	228.115	C15H16O2	[M+H]+	Stilbostemin B	Phenolic acids	Phenolic acids	162411-67-8	3	733528	639094	772571	610505	537900	554306	-	-
Hmqp005455	297.243	81.07	296.235	C18H32O3	[M+H]+	15(R)-Hydroxylinoleic Acid*	Lipids	Free fatty acids	177931-23-6	3	272801	297545	306548	192759	181000	206940	-	-
mws2523	421.08	241.01	422.082	C12H23O14P	[M-H]-	Trehalose 6-phosphate	Others	Saccharides	4484-88-2	1	369037	336970	342782	396458	448045	445487	C00689	ko00500,ko01100,ko01110
MA10039641	341.11	89.02	342.116	C12H22O11	[M-H]-	Lactobiose	Others	Saccharides	63-42-3	1	810444	812496	915103	853308	789218	746316	C00243	ko00052,ko01100,ko02010
Smpn011792	471.348	471.34	472.355	C30H48O4	[M-H]-	2,3-Dihydroxy-12-ursen-28-oic acid	Terpenoids	Triterpene	-	3	54570.8	128059	88725.8	63718	72617.5	66334.5	-	-
Lmyn003028	431.16	269.1	432.163	C19H28O11	[M-H]-	Benzyl-β-gentiobioside*	Phenolic acids	Phenolic acids	56775-64-5	1	235438	257444	252315	213829	236897	243752	-	-
MWSmce284	155.066	95.0471	154.063	C8H10O3	[M+H]+	3,4-Dimethoxyphenol	Phenolic acids	Phenolic acids	2033-89-8	3	202099	204238	167618	199005	186597	213628	-	-
pme0122	189.123	126.091	188.116	C8H16N2O3	[M+H]+	N6-Acetyl-L-lysine	Amino acids and derivatives	Amino acids and derivatives	692-04-6	3	829025	636780	818237	653024	744819	681068	C02727	ko00310,ko01100
pme2996	161.024	117.035	162.032	C9H6O3	[M-H]-	4-Hydroxycoumarin	Lignans and Coumarins	Coumarins	1076-38-6	3	233271	214194	191392	168178	183671	192523	C20414	-
MW0158390	539.24	347.09	538.239	C23H34N6O9	[M+H]+	Tyr-Asn-Asp-Lys	Amino acids and derivatives	Amino acids and derivatives	-	3	8.16415e+06	8.70324e+06	9.26514e+06	6.61029e+06	6.72233e+06	7.47919e+06	-	-
GQ512004	456.249	310.21	455.242	C25H33N3O5	[M+H]+	N1-Dihydrocaffeoyl-N10-coumaroylspermidine	Alkaloids	Phenolamine	-	3	226579	222421	320308	211784	204847	233207	-	-
Lmhp011388	353.27	261.22	352.261	C21H36O4	[M+H]+	2-α-Linolenoyl-glycerol	Lipids	Glycerol ester	55268-58-1	1	593009	628477	707440	205607	186068	180874	-	-
Zmmp002167	311.12	136.07	310.116	C14H18N2O6	[M+H]+	2-((L-tyrosyl)oxy)-5-amino-5-oxopentanoic acid	Amino acids and derivatives	Amino acids and derivatives	-	3	2.55618e+06	2.29681e+06	2.51159e+06	2.04894e+06	2.3433e+06	2.15335e+06	-	-
Zmgn001448	175.061	115.04	176.069	C7H12O5	[M-H]-	2-Propylmalic Acid*	Organic acids	Organic acids	-	1	388713	385353	365756	305519	338657	298342	C05994	ko00620
Lmtn002796	449.11	287.06	450.116	C21H22O11	[M-H]-	Aromadendrin-7-O-glucoside	Flavonoids	Flavanonols	28189-90-4	3	952084	1.04172e+06	843076	1.13318e+06	1.12204e+06	1.26649e+06	-	-
Lmyn000160	237.06	87.01	238.069	C8H14O8	[M-H]-	Mucic acid Dimethyl Ester	Phenolic acids	Phenolic acids	-	2	1.92504e+06	1.69609e+06	2.13226e+06	2.06628e+06	2.14872e+06	1.87727e+06	-	-
mws0981	178.037	136.015	179.044	C6H5N5O2	[M-H]-	Isoxanthopterin	Nucleotides and derivatives	Nucleotides and derivatives	529-69-1	3	93168.6	74237.4	75653.4	66848.2	62656.8	58264	C03975	-
mws1489	283.26	283.26	284.272	C18H36O2	[M-H]-	Stearic Acid	Lipids	Free fatty acids	57-11-4	3	1.46168e+06	1.58765e+06	1.69185e+06	1.55291e+06	1.7435e+06	1.76172e+06	C01530	ko00061,ko01040,ko01100
mws1297	269.1	101.02	270.11	C13H18O6	[M-H]-	Benzyl glucoside	Phenolic acids	Phenolic acids	4304-12-5	2	251179	225514	281234	246253	268546	234773	-	-
pme1383	170.08	134.06	169.074	C8H11NO3	[M+H]+	Pyridoxine	Others	Vitamin	65-23-6	1	2.99021e+06	2.57598e+06	3.3507e+06	2.6589e+06	2.40409e+06	2.74947e+06	C00314	ko00750,ko01100,ko01240
MW0103813	173.12	127.12	174.126	C9H18O3	[M-H]-	(±)-3-Hydroxynonanoic acid	Organic acids	Organic acids	88930-09-0	3	225344	221862	224799	212274	234457	242880	-	-
mws1174	313.07	253.05	314.079	C17H14O6	[M-H]-	3-O-Acetylpinobanksin	Flavonoids	Flavanonols	52117-69-8	3	610592	568000	765502	236289	261039	229153	C16418	ko00941
pmp000127	625.176	607.166	624.169	C28H32O16	[M+H]+	Chrysoeriol-6,8-di-C-glucoside	Flavonoids	Flavones	-	3	2.17503e+06	1.18577e+06	1.16249e+06	1.17534e+06	1.34991e+06	1.27429e+06	-	-
mws0072	433.113	271.06	432.106	C21H20O10	[M+H]+	Apigenin-5-O-glucoside	Flavonoids	Flavones	28757-27-9	3	4.82443e+06	8758100	8.22866e+06	5127370	5.89282e+06	5547700	-	-
MWStz191	467.119	303.05	466.111	C21H22O12	[M+H]+	Taxifolin-3'-O-glucoside	Flavonoids	Flavanonols	31106-05-5	3	449045	244218	489175	115571	132222	128414	-	-
Wasn002902	355.07	209.03	356.074	C15H16O10	[M-H]-	O-p-Coumaroylgalactaric acid	Phenolic acids	Phenolic acids	-	1	1.75829e+06	1.81048e+06	3.20195e+06	1.2465e+06	1.37404e+06	1.43095e+06	-	-
pmb1574	277.216	93.0699	276.209	C18H28O2	[M+H]+	9,12-Octadecadien-6-Ynoic Acid	Lipids	Free fatty acids	61481-29-6	3	6.36368e+06	6.32655e+06	6.3252e+06	5.00668e+06	5.1903e+06	4.52419e+06	-	-
Lmbn003970	329.23	211.14	330.241	C18H34O5	[M-H]-	9,12,13-TriHOME; 9(S),12(S),13(S)-Trihydroxy-10(E)-octadecenoic acid	Lipids	Free fatty acids	97134-11-7	2	324123	284410	332658	262613	250095	286943	C14833	ko00591
MWSmce690	175.02	59.01	176.032	C6H8O6	[M-H]-	Erythorbic Acid; Isoascorbic Acid	Others	Vitamin	89-65-6	3	740984	678209	704266	588278	675304	650918	-	-
Lmhp008801	476.28	335.26	475.27	C23H42NO7P	[M+H]+	LysoPE 18:3	Lipids	LPE	-	1	777538	828715	711193	242570	219966	252827	-	-
MW0158237	407.16	273.1	406.149	C18H22N4O7	[M+H]+	Trp-Ser-Asp	Amino acids and derivatives	Amino acids and derivatives	-	3	445086	433882	341153	330950	289318	299881	-	-
Smhp003438	611.16	593.14	610.153	C27H30O16	[M+H]+	Luteolin-6,8-di-C-glucoside*	Flavonoids	Flavones	29428-58-8	2	1.8049e+06	1885740	1.55341e+06	1.44288e+06	1625900	1.44129e+06	C10102	-
Lmmp002914	474.26	222.12	473.253	C25H35N3O6	[M+H]+	Bis(Dihydrocaffeoyl)spermidine	Alkaloids	Phenolamine	-	1	4.01142e+06	3.9221e+06	4.31391e+06	2.81535e+06	3.05147e+06	2.65267e+06	-	-
Zmdp001647	247.13	184.1	246.122	C10H18N2O5	[M+H]+	γ-Glutamyl-L-valine	Amino acids and derivatives	Amino acids and derivatives	-	1	4.2354e+06	3.64948e+06	4.303e+06	3.21855e+06	3.63448e+06	3.66095e+06	-	-
Lmmn000774	343.103	181.051	344.111	C15H20O9	[M-H]-	Dihydrocaffeoylglucose	Phenolic acids	Phenolic acids	-	3	151847	125996	129919	104798	100020	114875	-	-
Hmcp001578	641.17	479.11	640.164	C28H32O17	[M+H]+	Isorhamnetin-3,7-O-diglucoside	Flavonoids	Flavonols	6758-51-6	2	957160	515395	669043	635985	678702	732983	-	-
Wbmn009545	569.34	487.34	570.356	C34H50O7	[M-H]-	2,3-Diacetoxy-18-hydroxyoleana-5,12-dien-28-oic acid	Terpenoids	Triterpene	-	3	111080	96621.5	109545	132851	116389	131141	-	-
MWS0618	204.124	71.0509	205.131	C9H19NO4	[M-H]-	Pantothenol	Others	Alcohol compounds	16485-10-2	3	171157	140795	171243	144286	139994	125657	-	-
MW0155116	443.19	399.2	442.185	C22H26N4O6	[M+H]+	Phe-Asn-Tyr	Amino acids and derivatives	Amino acids and derivatives	-	3	916489	830811	928776	758110	688381	793186	-	-
pme0033	137.046	119.035	136.038	C5H4N4O	[M+H]+	Hypoxanthine	Nucleotides and derivatives	Nucleotides and derivatives	68-94-0	3	2.41376e+06	2.41839e+06	2.23799e+06	2.22306e+06	2.01194e+06	1.93911e+06	C00262	ko00230,ko01100,ko01232
MWSmce462	124.075	107.049	123.068	C7H9NO	[M+H]+	4-Hydroxybenzylamine	Alkaloids	Phenolamine	696-60-6	3	77030	36805.6	52217.4	70143.1	66160	60762.6	-	-
pme0534	195.05	75.01	196.058	C6H12O7	[M-H]-	Gluconic acid	Others	Saccharides	526-95-4	1	3.84738e+06	3.99274e+06	3.51973e+06	3.67905e+06	4.20477e+06	4.14324e+06	C00257	ko00030,ko01100,ko01110,ko01200
mws1375	304.15	185.093	303.143	C12H21N3O6	[M+H]+	Nicotianamine	Alkaloids	Alkaloids	34441-14-0	3	5.22746e+06	5.82212e+06	5.39262e+06	6.18775e+06	6.41122e+06	7.09192e+06	C05324	ko00270,ko00999,ko01100,ko01110
MWS1798	113.06	67.054	112.052	C6H8O2	[M+H]+	2,4-Hexadienoic acid	Organic acids	Organic acids	110-44-1	3	178213	113795	163946	169011	149459	170395	-	-
pmn001368	699.251	537.197	700.258	C32H44O17	[M-H]-	Olivil-4,4'-Di-O-glucoside	Lignans and Coumarins	Lignans	-	3	18891.3	17624	11298.8	19065.1	21267.9	18615.8	-	-
Lmgn001670	137.03	108.02	138.032	C7H6O3	[M-H]-	Salicylic acid	Phenolic acids	Phenolic acids	69-72-7	3	3.19261e+06	3.26575e+06	3.11065e+06	3.02675e+06	2.6984e+06	2.65849e+06	C00805	ko00996,ko01100,ko01110,ko04075
MWS0813	128.036	82.0295	129.043	C5H7NO3	[M-H]-	5-Oxoproline*	Amino acids and derivatives	Amino acids and derivatives	149-87-1	3	88174	85279.3	76482.6	73662	66350.3	76460.1	C02237	ko00470,ko01100
Lmtp002474	565.16	427.1	564.148	C26H28O14	[M+H]+	Apigenin-6-C-(2''-glucosyl)arabinoside	Flavonoids	Flavones	-	1	4.96196e+06	4.61079e+06	4.88971e+06	4.13337e+06	4.21476e+06	4.71578e+06	-	-
pme3256	611.161	303.05	611.161	C27H31O16+	[M]+	Delphinidin-3-O-rutinoside	Flavonoids	Anthocyanidins	15674-58-5	3	62773.9	183522	151387	164630	151439	175109	C16315	ko00942
pmb3142	299.077	137.024	300.084	C13H16O8	[M-H]-	Salicylic acid-2-O-glucoside	Phenolic acids	Phenolic acids	10366-91-3	3	1.50361e+06	1.17803e+06	1.27393e+06	1.16025e+06	1.14007e+06	1.30021e+06	-	-
MWS201412	262.138	84.0816	261.132	C10H19N3O5	[M+H]+	Lys-Asp*	Amino acids and derivatives	Amino acids and derivatives	20556-18-7	3	1.57744e+07	1.31292e+07	1.53169e+07	11338866	1.30777e+07	1.19538e+07	-	-
MWS0132	611.15	306.07	612.152	C20H32N6O12S2	[M-H]-	Oxiglutatione	Amino acids and derivatives	Amino acids and derivatives	27025-41-8	1	320515	301326	402689	313744	281506	274106	C00127	ko00480,ko01100,ko01240
Wasn001007	337.08	277.06	338.085	C12H18O11	[M-H]-	Isoascorbic acid 2-O-glucoside	Others	Vitamin	-	2	6.74325e+06	7.5125e+06	7.93539e+06	6.47702e+06	6.56817e+06	5.73741e+06	-	-
MWSslk095	127.04	55.0189	128.047	C6H8O3	[M-H]-	4-Hydroxy-2,5-dimethyl-3(2H)furanone	Others	Ketone compounds	3658-77-3	3	36814.4	39188.5	30641.2	36989.8	31958.6	34602.1	-	-
Lmgp000796	150.06	61.01	149.048	C8H7NO2	[M+H]+	4-Hydroxymandelonitrile	Alkaloids	Phenolamine	13093-65-7	3	407409	347111	409523	315610	343253	296990	C00650	-
Zmsp000608	148.097	86.0595	147.089	C6H13NO3	[M+H]+	3-epi-fagomine	Alkaloids	Piperidine alkaloids	-	3	53797.6	52652.8	72526.5	69804.6	75363.6	65122.2	-	-
pmc0281	400.146	136.062	399.139	C15H21N5O8	[M+H]+	Ribosyladenosine	Nucleotides and derivatives	Nucleotides and derivatives	-	3	1.02013e+06	971806	1.16279e+06	909460	921257	804020	-	-
Lmfn000604	331.07	169.01	332.074	C13H16O10	[M-H]-	6-O-Galloyl-β-D-glucose*	Phenolic acids	Phenolic acids	13186-19-1	1	1.79657e+06	1.77657e+06	1.85426e+06	1.55888e+06	1.62318e+06	1.40433e+06	-	-
pme0519	341.11	119.03	342.116	C12H22O11	[M-H]-	D-Sucrose*	Others	Saccharides	57-50-1	1	38020464	4.62333e+07	4.49183e+07	4.19158e+07	4.83485e+07	4.39005e+07	C00089	ko00052,ko00500,ko01100,ko01110,ko02010
Wmhp000055	169.05	65.04	168.042	C8H8O4	[M+H]+	2,5-Dimethoxybenzoquinone*	Quinones	Quinones	3117-03-1	1	1.15224e+06	1.42513e+06	1.66075e+06	1.54508e+06	1.71452e+06	1.49029e+06	-	-
mws0856	463.09	301.04	464.096	C21H20O12	[M-H]-	Quercetin-4'-O-glucoside (Spiraeoside)	Flavonoids	Flavonols	20229-56-5	1	1.17168e+07	8.02513e+06	1.37197e+07	5.03795e+06	5.42487e+06	4.67927e+06	-	-
Zmzn003953	309.2	227.2	310.214	C18H30O4	[M-H]-	13(s)-hydroperoxy-(9z,11e,15z)-octadecatrienoic acid	Lipids	Free fatty acids	67597-26-6	1	5.96442e+06	6.33577e+06	6.24908e+06	5.4938e+06	6.28857e+06	6.24044e+06	C04785	ko00592,ko01100,ko01110
Hmjn008136	469.33	469.33	470.34	C30H46O4	[M-H]-	2,3-Dihydroxyoleana-11,13(18)-dien-28-oic acid (Camaldulenic acid)	Terpenoids	Triterpene	71850-15-2	3	193109	223429	212876	148235	147786	129753	-	-
pme2601	89.0244	59.0139	90.0317	C3H6O3	[M-H]-	3-Hydroxypropanoic acid	Organic acids	Organic acids	503-66-2	3	219484	146559	218354	156964	135276	145533	C01013	ko00240,ko00410,ko00640,ko01100,ko01200
mws1584	515.12	191.03	516.127	C25H24O12	[M-H]-	1,3-O-Dicaffeoylquinic Acid (Cynarin)	Phenolic acids	Phenolic acids	30964-13-7	3	927962	829751	913877	771316	664329	725194	C10445	-
Lmjp003090	385.113	223.06	384.106	C17H20O10	[M+H]+	Isofraxidin-7-O-glucoside	Lignans and Coumarins	Coumarins	483-91-0	3	1.43174e+06	1.4067e+06	1.43973e+06	1.30594e+06	1.47612e+06	1.50216e+06	-	-
Lmhp002031	245.19	86.1	244.179	C12H24N2O3	[M+H]+	L-Leucyl-L-Leucine	Amino acids and derivatives	Amino acids and derivatives	3303-31-9	1	541340	437584	649788	555669	561704	634230	-	-
pmb2999	461.109	299.056	462.116	C22H22O11	[M-H]-	Chrysoeriol-5-O-glucoside	Flavonoids	Flavones	-	3	3.1878e+06	2.45664e+06	3.61319e+06	1.30755e+06	1.49854e+06	1.48859e+06	-	-
Lmqp000873	101.022	55.0171	100.016	C4H4O3	[M+H]+	Succinic anhydride	Organic acids	Organic acids	108-30-5	3	498877	461640	625083	542673	496491	467862	C19524	-
pmb1754	184.073	125.001	184.073	C5H15NO4P+	[M]+	O-Phosphocholine	Alkaloids	Alkaloids	107-73-3	3	2.31401e+06	1.82592e+06	1.99025e+06	2.48326e+06	2.14032e+06	2.27221e+06	C00588	ko00564,ko01100
MWSslk009	197.06	141.07	196.052	C13H8O2	[M+H]+	Xanthone	Flavonoids	Other Flavonoids	90-47-1	3	72309.5	118927	63164.1	59830.3	68353	68401.3	-	-
Cmpp003619	193.05	105.068	192.042	C10H8O4	[M+H]+	6,7-Dihydroxy-4-methylcoumarin	Lignans and Coumarins	Coumarins	529-84-0	3	2.45283e+06	2.56248e+06	2.19458e+06	2.25079e+06	2.61491e+06	2.49212e+06	-	-
mws1598	138.023	79.9564	139.03	C3H9NO3S	[M-H]-	3-Amino-1-propionic sulfonic acid	Organic acids	Organic acids	3687-18-1	3	72831.6	48395.6	51371.1	58475.6	66634.1	67095.8	-	-
mws0214	181.072	71.0139	182.079	C6H14O6	[M-H]-	D-Sorbitol	Others	Saccharides	50-70-4	3	330969	333681	299219	280896	326265	298736	C00794	ko00051,ko00052,ko01100,ko02010
Wmzn000227	145.06	109.04	146.058	C6H10O4	[M-H]-	2,2-Dimethylsuccinic acid	Organic acids	Organic acids	597-43-3	3	75658.4	71458.5	69083.6	86517.8	91431.6	78591.1	-	-
Hmln000297	179.05	59.01	180.063	C6H12O6	[M-H]-	Inositol*	Others	Saccharides	87-89-8	1	4.19167e+06	4.53866e+06	4.37005e+06	4.09886e+06	4.04052e+06	4.62928e+06	C00137	ko00052,ko00053,ko00562,ko01100,ko01110,ko01250,ko02010,ko04070
MW0155388	613.34	577.22	612.338	C30H44N8O6	[M+H]+	Phe-Tyr-Lys-Arg	Amino acids and derivatives	Amino acids and derivatives	-	3	1.10473e+07	9.43287e+06	1.09801e+07	8.7675e+06	1.01781e+07	9.22373e+06	-	-
Wbtp003341	291.09	139.04	290.079	C15H14O6	[M+H]+	(3,5-dihydroxyphenyl)-(4-hydroxy-2,6-dimethoxyphenyl)methanone	Others	Ketone compounds	-	1	883536	652121	777333	356296	410725	366207	-	-
pme0230	268.1	136.06	267.097	C10H13N5O4	[M+H]+	Adenosine	Nucleotides and derivatives	Nucleotides and derivatives	58-61-7	1	8.1697e+06	8.11387e+06	8.11706e+06	6.51611e+06	7.32858e+06	6.36563e+06	C00212	ko00230,ko01100,ko01232,ko02010
Zmjp000624	168.06	150.05	167.058	C8H9NO3	[M+H]+	Pyridoxal	Others	Vitamin	66-72-8	1	2.11614e+06	1.85811e+06	2.2084e+06	1.9138e+06	1.69672e+06	1.96811e+06	C00250	ko00750,ko01100,ko01240
mws0629	281.113	166.086	280.106	C13H16N2O5	[M+H]+	L-Aspartyl-L-Phenylalanine	Amino acids and derivatives	Amino acids and derivatives	13433-09-5	3	257661	266384	302822	246885	223775	261233	-	-
mws0913	447.093	285.041	448.101	C21H20O11	[M-H]-	Kaempferol-3-O-galactoside (Trifolin)*	Flavonoids	Flavonols	23627-87-4	1	1.44088e+06	1.29273e+06	1.76238e+06	829497	968928	901594	C12626	ko00944,ko01110
mws1013	177.02	133.03	178.027	C9H6O4	[M-H]-	Esculetin (6,7-Dihydroxycoumarin)	Lignans and Coumarins	Coumarins	305-01-1	1	1.8016e+06	1.73282e+06	1.88615e+06	1.52549e+06	1.35695e+06	1.32198e+06	C09263	ko00999,ko01110
MWSmce096	219.17	81.0684	218.167	C15H22O	[M+H]+	Nootkatone	Terpenoids	Sesquiterpenoids	4674-50-4	3	1.06117e+06	1.05247e+06	1.15435e+06	817600	851627	948332	C17914	-
Zmbp000555	175.12	130.1	174.079	C10H10N2O	[M+H]+	3-Indole acetamide	Alkaloids	Plumerane	-	3	236838	184952	200836	163541	149257	174499	-	-
MWSslk257	324.06	112.052	323.052	C9H14N3O8P	[M+H]+	Cytidine 5'-monophosphate(Cytidylic acid)	Nucleotides and derivatives	Nucleotides and derivatives	63-37-6	3	56962	48825.7	104270	63019	63350	55015	C00055	ko00240,ko01100,ko01232
MW0156957	521.2	341.1	520.192	C22H28N6O9	[M+H]+	Ser-Tyr-His-Asp	Amino acids and derivatives	Amino acids and derivatives	-	3	331727	348803	305922	334347	353647	302363	-	-
Lmbn001754	175.06	115.04	176.069	C7H12O5	[M-H]-	3-Isopropylmalic Acid*	Organic acids	Organic acids	921-28-8	1	405420	360078	434756	319867	322584	279512	C04411	ko00290,ko01100,ko01110,ko01210,ko01230
mws0011	371.13	209.08	372.142	C17H24O9	[M-H]-	Syringin	Phenolic acids	Phenolic acids	118-34-3	3	189698	188820	291736	256315	295321	260937	C01533	ko00940
MWS5083	455.097	96.9685	456.105	C17H21N4O9P	[M-H]-	Flavin Single Nucleotide(FMN)	Nucleotides and derivatives	Nucleotides and derivatives	6184-17-4	3	71762.9	78823.4	90940.1	72605.4	68358.2	62015.7	C00061	ko00190,ko00740,ko01100,ko01110,ko01240
Lmbn004240	329.23	199.13	330.241	C18H34O5	[M-H]-	9,10-Dihydroxy-12,13-epoxyoctadecanoic acid	Lipids	Free fatty acids	-	2	164778	154046	177687	134654	128742	115244	C14837	ko00591
Zapp008667	353.138	233.08	352.131	C21H20O5	[M+H]+	Xanthohumol C	Flavonoids	Chalcones	189299-05-6	3	196817	204055	198826	123512	120757	139455	-	-
pma0170	498.26	177.055	497.253	C27H35N3O6	[M+H]+	N',N''-Diferuloylspermidine	Alkaloids	Phenolamine	-	3	235361	176292	278890	147263	172542	161765	-	-
Zmdp000976	208.064	119.015	207.056	C7H13NO4S	[M+H]+	S-(2-Carboxypropyl)cysteine	Amino acids and derivatives	Amino acids and derivatives	6852-42-2	3	111752	89376.4	113504	82749.4	90713.2	77554.5	-	-
pme2380	145.014	101.024	146.022	C5H6O5	[M-H]-	α-Ketoglutaric acid	Organic acids	Organic acids	328-50-7	3	1.14708e+06	1.18677e+06	1.21549e+06	1.27644e+06	1.30311e+06	1.12179e+06	C00026	ko00020,ko00040,ko00053,ko00220,ko00250,ko00300,ko00310,ko00340,ko00430,ko00470,ko00630,ko00650,ko00660,ko01100,ko01110,ko01200,ko01210,ko01230,ko01240
Wayn005368	491.08	329.03	492.09	C22H20O13	[M-H]-	3,3'-Di-O-Methylellagic acid 4'-glucoside	Tannins	Tannin	51803-68-0	3	211882	189073	136661	127883	118997	139389	-	-
Lmmp001410	253.15	165.05	252.147	C13H20N2O3	[M+H]+	Dihydrocaffeoylputrescine	Alkaloids	Phenolamine	-	1	888889	796517	923476	718076	821103	717030	-	-
MWS0559	161.05	71.01	162.053	C6H10O5	[M-H]-	1,6-anhydro-β-D-glucose	Others	Saccharides	498-07-7	1	187169	174710	166471	171586	148551	170546	-	-
MWSHY0058	287.055	153.019	286.048	C15H10O6	[M+H]+	Luteolin (5,7,3',4'-Tetrahydroxyflavone)	Flavonoids	Flavones	491-70-3	3	87762.3	109582	96498.9	75531.7	86914	87088.8	C01514	ko00941,ko00944,ko01100,ko01110
Lmhp010190	522.355	184.073	521.348	C26H52NO7P	[M+H]+	LysoPC 18:1(2n isomer)	Lipids	LPC	-	3	130081	139879	133636	16075.3	17721.9	18862.7	-	-
mws0386	115.08	97.93	116.084	C6H12O2	[M-H]-	Caproic Acid(C6:0)	Organic acids	Organic acids	142-62-1	3	4.36525e+06	2.26304e+06	2.43107e+06	4.19259e+06	3.71742e+06	4.34629e+06	C01585	-
MWS1855	109.076	67.0413	108.069	C6H8N2	[M+H]+	2,5-Dimethyl pyrazine	Alkaloids	Alkaloids	123-32-0	3	556981	491225	555571	499210	581537	567800	-	-
pmp000691	229.107	151.075	228.1	C11H16O5	[M+H]+	Loganetin	Terpenoids	Monoterpenoids	29748-10-5	3	60020	23602	24338.6	31583.9	37093	35010	-	-
Lmyn006922	447.13	285.077	448.137	C22H24O10	[M-H]-	Sakuranin	Flavonoids	Flavanones	529-39-5	3	42657.8	40960.8	101453	41904.4	35732.2	38168.5	C17391	-
MWSHY0065	291.09	139.04	290.079	C15H14O6	[M+H]+	Catechin*	Flavonoids	Flavanols	154-23-4	1	634117	622320	897487	338365	390473	390443	C06562	ko00941,ko01110
Zmyn000230	147.029	57.0344	148.037	C5H8O5	[M-H]-	2-Dehydro-3-deoxy-L-arabinonate*	Others	Saccharides	-	1	1.14611e+06	1.18241e+06	1.26051e+06	1.00836e+06	895818	867335	C00684	ko00053,ko01100
mws1073	595.17	457.13	594.159	C27H30O15	[M+H]+	Apigenin-6,8-di-C-glucoside (Vicenin-2)	Flavonoids	Flavones	23666-13-9	2	1.05238e+07	8.30662e+06	9.74999e+06	8.8472e+06	7.94398e+06	9.33034e+06	C10195	-
MWS201444	204.097	84.0448	203.091	C7H13N3O4	[M+H]+	Gln-Gly	Amino acids and derivatives	Amino acids and derivatives	2650-65-9	3	726580	772974	750177	799047	806462	695370	-	-
Hmgp002804	474.26	222.11	473.253	C25H35O6N3	[M+H]+	N1,N10-Dihydrocaffeoylspermidine	Alkaloids	Phenolamine	-	3	3.94257e+06	3.39464e+06	3.72761e+06	2.37134e+06	2.67595e+06	2.77726e+06	-	-
MW0158888	474.26	222.11	473.26	C19H35N7O7	[M+H]+	Val-Arg-Ala-Glu	Amino acids and derivatives	Amino acids and derivatives	-	3	3.94257e+06	3.39464e+06	3.72761e+06	2.37134e+06	2.67595e+06	2.77726e+06	-	-
Jmwn002172	315.11	135.04	316.116	C14H20O8	[M-H]-	3,4-dihydroxyphenylethanol-β-D-glucopyranoside	Phenolic acids	Phenolic acids	-	2	1.22954e+06	1.10265e+06	1.03629e+06	957983	933873	820606	-	-
mws1080	341.11	179.06	342.116	C12H22O11	[M-H]-	Galactinol	Others	Saccharides	3687-64-7	1	2.43608e+06	2.19008e+06	2.68127e+06	2232279	2.59835e+06	2.55369e+06	C01235	ko00052,ko01100
Lahp002608	188.07	118.07	187.063	C11H9NO2	[M+H]+	3,5-Dihydro-2H-Furo[3,2-C]Quinolin-4-One*	Alkaloids	Quinoline alkaloids	-	1	1.49784e+06	1.22667e+06	1.29163e+06	1.25093e+06	1.06285e+06	1.18368e+06	-	-
pme2693	131.118	114.091	130.111	C6H14N2O	[M+H]+	N-Acetylputrescine	Alkaloids	Alkaloids	18233-70-0	3	175693	168523	175360	208531	178050	186926	C02714	ko00330,ko01100
MWSHY0179	431.134	269.094	430.126	C22H22O9	[M+H]+	Formononetin-7-O-glucoside (Ononin)	Flavonoids	Isoflavones	486-62-4	3	286802	268455	267309	249879	221364	214504	C10509	ko00943
Hmxp007521	315.087	300.06	314.079	C17H14O6	[M+H]+	3',4'-Dihydroxy-7,5'-dimethoxyflavone	Flavonoids	Flavones	-	3	513968	552508	536209	436219	447897	507303	-	-
mws1333	341.11	113.02	342.116	C12H22O11	[M-H]-	Melibiose	Others	Saccharides	585-99-9	1	1.98122e+07	2.26492e+07	2.16808e+07	2.17733e+07	1.92387e+07	1.87121e+07	C05402	ko00052,ko01100,ko02010
mws2212	179.03	135.05	180.042	C9H8O4	[M-H]-	Caffeic acid	Phenolic acids	Phenolic acids	331-39-5	1	698214	679640	672570	626601	542851	546959	C01197	ko00940,ko01100,ko01110
mws0863	213.02	96.97	214.024	C5H11O7P	[M-H]-	2-Deoxyribose-5'-phosphate	Nucleotides and derivatives	Nucleotides and derivatives	102916-66-5	3	319984	289810	289443	429639	374548	372327	C00673	ko00030,ko01100
pmb0197	298.115	166.072	297.107	C11H15N5O5	[M+H]+	N7-Methylguanosine	Nucleotides and derivatives	Nucleotides and derivatives	20244-86-4	3	331797	369712	365053	269927	300171	255486	C20674	-
Yshs000050	455.351	437.349	454.345	C30H46O3	[M+H]+	Lupane-20(29)-en-3-on-28-oic acid	Terpenoids	Triterpene	-	3	1.10545e+06	1.22381e+06	1.14909e+06	1.18752e+06	1.29789e+06	1.40317e+06	-	-
Jmzn006005	177.055	117.04	178.063	C10H10O3	[M-H]-	3,4-Methylenedioxy cinnamyl alcohol	Lignans and Coumarins	Lignans	58095-76-4	3	43012.1	39843.1	42988.4	34333.7	29067.8	31550.6	-	-
pmb0758	491.155	329	490.147	C24H26O11	[M+H]+	Anisic acid-O-feruloyl glucoside	Phenolic acids	Phenolic acids	-	3	1.75912e+06	715327	2.26025e+06	1.50573e+06	1.77648e+06	1.68764e+06	-	-
pmb0624	611.16	431.1	610.153	C27H30O16	[M+H]+	Isoorientin-7-O-glucoside	Flavonoids	Flavones	-	3	515985	538625	413940	321944	273056	307023	-	-
mws0289	480.308	339.289	479.301	C23H46NO7P	[M+H]+	LysoPE 18:1	Lipids	LPE	89576-29-4	3	151342	165889	148801	117184	104348	123125	-	-
Hmln001682	667.15	462.08	668.159	C29H32O18	[M-H]-	Quercetin-3-O-(6''-O-acetyl)glucosyl-(1→3)-Galactoside	Flavonoids	Flavonols	-	3	513274	226271	205452	191557	223691	197635	-	-
pme1216	122.025	78.0349	123.032	C6H5NO2	[M-H]-	2-Picolinic acid	Organic acids	Organic acids	98-98-6	3	475358	446828	459107	442383	437424	379303	C10164	ko00380,ko01100
mws2368	137.06	119.05	138.068	C8H10O2	[M-H]-	Tyrosol; 4-Hydroxyphenylethanol	Phenolic acids	Phenolic acids	501-94-0	3	383139	409078	454205	364762	313094	361926	C06044	ko00350,ko01100
pme0152	129.066	84.0444	128.059	C5H8N2O2	[M+H]+	5,6-Dihydro-5-methyluracil	Nucleotides and derivatives	Nucleotides and derivatives	696-04-8	3	313405	224750	276546	265210	249444	224283	C00906	-
MWS201408	263.087	136.039	262.08	C9H14N2O7	[M+H]+	Asp-Glu	Amino acids and derivatives	Amino acids and derivatives	6157-06-8	3	204105	222028	214152	179786	212662	195935	-	-
pme2125	503.162	179.055	504.169	C18H32O16	[M-H]-	Raffinose*	Others	Saccharides	512-69-6	3	4.27973e+06	3.76464e+06	3.06526e+06	3.02798e+06	3.2758e+06	3.57975e+06	C00492	ko00052,ko01100,ko02010
Lmbn004790	209.082	179.035	210.089	C11H14O4	[M-H]-	Methyl 3-(3-hydroxy-4-methoxyphenyl)propanoate*	Phenolic acids	Phenolic acids	129150-61-4	3	436444	411293	536525	414471	368203	435080	-	-
pme2527	133.097	116.071	132.09	C5H12N2O2	[M+H]+	L-Ornithine	Amino acids and derivatives	Amino acids and derivatives	70-26-8	3	1.32412e+06	1.36939e+06	1.33676e+06	1.42846e+06	1.36425e+06	1.60409e+06	C00077	ko00220,ko00330,ko00470,ko00480,ko01100,ko01110,ko01210,ko01230,ko02010
MW0110288	295.17	136.07	294.158	C15H22N2O4	[M+H]+	Tyrosylleucine	Amino acids and derivatives	Amino acids and derivatives	17355-10-1	3	775850	806699	673496	604243	713749	643531	-	-
MWS2417	167.03	121.03	168.042	C8H8O4	[M-H]-	3-Hydroxymandelate	Organic acids	Organic acids	17119-15-2	2	275039	199887	283458	234779	211581	198709	-	-
mws1155	181.072	101.024	182.079	C6H14O6	[M-H]-	D-Mannitol*	Others	Saccharides	69-65-8	3	130316	125091	136756	107318	119264	127248	C00392	ko00051,ko01100,ko02010
mws0227	132.102	86.0964	131.095	C6H13NO2	[M+H]+	L-Leucine*	Amino acids and derivatives	Amino acids and derivatives	61-90-5	1	6.18814e+06	5.37324e+06	5.84988e+06	5.09926e+06	5.65258e+06	4.78233e+06	C00123	ko00280,ko00290,ko00966,ko00970,ko01100,ko01110,ko01210,ko01230,ko02010
Zmpn002553	339.07	177.02	340.079	C15H16O9	[M-H]-	Cichoriin	Lignans and Coumarins	Coumarins	531-58-8	1	1.50187e+06	1.27937e+06	1.20768e+06	1.35226e+06	1.18137e+06	1.39049e+06	C09206	-
pme0120	118.086	101.06	117.079	C5H11NO2	[M+H]+	5-Aminovaleric acid	Organic acids	Organic acids	660-88-8	3	1.30047e+06	1.13976e+06	1.2141e+06	1.05001e+06	1.03827e+06	897691	C00431	ko00310,ko00330,ko00470,ko01100
pmb2507	213.017	96.9696	214.024	C5H11O7P	[M-H]-	2-Deoxyribose-1-phosphate	Nucleotides and derivatives	Nucleotides and derivatives	17210-42-3	3	9	9	9	89759.1	80727.9	75944.7	C00672	ko00030,ko00240,ko01100
Hmgp002327	188.07	118.06	187.063	C11H9O2N	[M+H]+	3-amino-2-naphthoic acid	Alkaloids	Alkaloids	-	1	1.59434e+06	1.35766e+06	1.56433e+06	1.33405e+06	1.1482e+06	1.16054e+06	-	-
Lmsn003111	325.09	145.03	326.1	C15H18O8	[M-H]-	1-O-p-Coumaroyl-β-D-glucose	Phenolic acids	Phenolic acids	7139-64-2	1	112013	110344	101114	98888.5	103061	87115.5	C16827	-
MWSmce220	177.04	59.01	178.048	C6H10O6	[M-H]-	D-Glucono-1,5-lactone*	Others	Saccharides	90-80-2	3	967131	1.14629e+06	842781	1.21052e+06	1.02688e+06	1.17689e+06	C00198	ko00030,ko01100,ko01110,ko01200
Lmmp002795	463.12	301.07	462.116	C22H22O11	[M+H]+	Pratensein-7-O-glucoside	Flavonoids	Isoflavones	36191-03-4	2	749465	924233	766008	590073	634221	699978	-	-
MWSHC20163	255.24	255.24	256.24	C16H32O2	[M-H]-	Cetostearic acid	Lipids	Free fatty acids	-	1	2.94564e+07	3.10721e+07	3.09711e+07	3.00153e+07	3.33322e+07	3.56815e+07	-	-
HJN051	623.16	315.05	624.169	C28H32O16	[M-H]-	Tamarixetin-3-O-rutinoside	Flavonoids	Flavonols	-	2	1.98977e+06	1.8184e+06	1.94091e+06	1.0961e+06	1.13705e+06	961027	-	-
pme1109	152.06	135.03	151.049	C5H5N5O	[M+H]+	Guanine	Nucleotides and derivatives	Nucleotides and derivatives	73-40-5	2	3.23637e+06	3.05039e+06	3.28056e+06	2.68905e+06	2.84135e+06	3.18104e+06	C00242	ko00230,ko01100,ko01232
MWSslk002	433.113	271.064	432.106	C21H20O10	[M+H]+	Sophoricoside*	Flavonoids	Isoflavones	152-95-4	3	437455	391980	608596	312683	295745	349965	-	-
mws0366	277.217	277.219	278.225	C18H30O2	[M-H]-	γ-Linolenic Acid*	Lipids	Free fatty acids	506-26-3	2	1.22764e+07	1.16507e+07	1.42701e+07	4.14821e+06	4.81955e+06	4.86342e+06	C06426	ko00591,ko01040,ko01100
Zmzn000113	146.047	102.056	147.053	C5H9NO4	[M-H]-	L-threo-3-Methylaspartate	Amino acids and derivatives	Amino acids and derivatives	6061-13-8	1	510957	523613	523663	519995	470807	560740	C03618	ko00630,ko00660,ko01100,ko01200
Wayn000504	457.12	341.11	458.127	C16H26O15	[M-H]-	Malic acid-1-O-diglucoside	Organic acids	Organic acids	-	3	674634	601056	692327	620209	549488	525241	-	-
mws2608	222.1	84.05	221.09	C8H15NO6	[M+H]+	N-Acetyl-D-galactosamine	Others	Saccharides	1811-31-0	3	266232	315459	215611	265094	246668	222473	C01132	ko00052,ko00520,ko01100,ko01250
mws1200	177.056	145.028	178.063	C10H10O3	[M-H]-	p-Coumaric acid methyl ester	Phenolic acids	Phenolic acids	19367-38-5	3	34238.8	55397.3	30736.3	23974.5	20445.2	20959.5	-	-
MWS2076	110.06	65.0414	109.053	C6H7NO	[M+H]+	2-Aminophenol	Alkaloids	Phenolamine	95-55-6	3	185696	170685	194952	171642	173324	147594	C01987	ko00380,ko01100
Lmbp002309	371.1	209.05	370.126	C17H22O9	[M+H]+	Sinapaldehyde-4-O-Glucoside	Phenolic acids	Phenolic acids	154461-65-1	3	1.57759e+06	1.37156e+06	1.46182e+06	1.0919e+06	1.25785e+06	1.29047e+06	-	-
mws0371	327.233	283.243	328.24	C22H32O2	[M-H]-	Cis-4,7,10,13,16,19-Docosahexaenoic Acid	Lipids	Free fatty acids	6217-54-5	3	31997.1	28886	34811.3	27841.8	31970.3	27311.5	C06429	ko01040
Lmgn000160	131.05	70.03	132.054	C4H8N2O3	[M-H]-	3-Ureidopropionic Acid	Organic acids	Organic acids	462-88-4	1	1.10135e+06	1.1566e+06	1.06378e+06	1.05556e+06	1.14308e+06	957255	C02642	ko00240,ko00410,ko00770,ko01100
Wagn012030	653.38	397.14	654.383	C31H58O14	[M-H]-	2-Palmitoyl-Sn-Glycerol 3-O-Diglucoside	Lipids	Glycerol ester	-	3	97448.8	98980.8	121572	28220.9	30784.1	33693.3	-	-
pmn001420	341.09	179.04	342.095	C15H18O9	[M-H]-	1-O-Caffeoyl-β-D-glucose*	Phenolic acids	Phenolic acids	14364-08-0	1	1.51688e+07	1.59844e+07	1.77507e+07	1.31789e+07	1.35267e+07	1.14221e+07	C10433	-
Wagp011647	355.16	203.04	354.147	C21H22O5	[M+H]+	Epoxybergamottin	Lignans and Coumarins	Coumarins	206978-14-5	1	287987	468485	408192	171781	171554	146460	C22153	ko00999
MWS04455	132.065	86.0607	131.058	C5H9NO3	[M+H]+	Cis-L-3-hydroxyproline*	Amino acids and derivatives	Amino acids and derivatives	567-35-1	3	670857	674525	608429	775583	709999	648536	-	-
pmf0470	132.065	86.0601	131.058	C5H9NO3	[M+H]+	cis-4-Hydroxy-D-proline*	Amino acids and derivatives	Amino acids and derivatives	2584-71-6	3	670857	674525	608429	775583	709999	648536	C03440	ko00470,ko01100
mws0216	132.07	86.06	131.058	C5H9NO3	[M+H]+	Trans-4-Hydroxy-L-proline*	Amino acids and derivatives	Amino acids and derivatives	51-35-4	3	670857	674525	608429	775583	709999	648536	C01157	ko00330,ko00470,ko01100,ko02010
Lsjp211203	209.15	55.05	208.146	C13H20O2	[M+H]+	3-hydroxy-β-ionone	Others	Others	-	1	2.22789e+06	2.37201e+06	2.20057e+06	2.13785e+06	2213745	1.86213e+06	-	-
pme2598	167.035	123.045	168.042	C8H8O4	[M-H]-	3,4-Dihydroxybenzeneacetic acid	Phenolic acids	Phenolic acids	102-32-9	3	7.5016e+06	6.82227e+06	7.79552e+06	6.39502e+06	7.2935e+06	7.62356e+06	C01161	ko00350,ko01100
MWSslk064	211.06	147.008	210.053	C10H10O5	[M+H]+	Dimethyl 4-Hydroxyisophthalate	Phenolic acids	Phenolic acids	5985-24-0	3	286106	245580	259530	355354	298477	342032	-	-
Hmgp002121	609.18	463.08	608.153	C31H28O13	[M+H]+	Hispidulin-7-O-(6''-O-p-Coumaroyl)Glucoside	Flavonoids	Flavones	-	3	1015280	713840	679887	384162	336322	325375	-	-
mws0396	281.25	281.25	282.256	C18H34O2	[M-H]-	Elaidic Acid	Lipids	Free fatty acids	112-79-8	1	1.71132e+06	1.62788e+06	1.86375e+06	1.58909e+06	1.83715e+06	1.88533e+06	C01712	-
Lmhn002321	461.07	167.04	462.08	C21H18O12	[M-H]-	Vnilloylcaffeoyltartaric acid	Phenolic acids	Phenolic acids	-	3	143175	116501	207578	147093	132664	158997	-	-
Lmhp002001	265.15	72.08	264.147	C14H20N2O3	[M+H]+	L-Valyl-L-Phenylalanine	Amino acids and derivatives	Amino acids and derivatives	3918-92-1	3	485773	401996	655073	504859	445695	533116	-	-
MWSHC20159	387.204	207.14	386.194	C19H30O8	[M+H]+	Roseoside	Others	Ketone compounds	54835-70-0	3	1.3035e+06	377055	1131145	372155	310987	336199	-	-
mws0982	126.103	68.0495	125.095	C6H11N3	[M+H]+	1-Methylhistamine	Alkaloids	Alkaloids	501-75-7	3	172552	155780	200280	179528	179026	152552	C05127	ko00340,ko01100
pme0008	176.103	113.071	175.096	C6H13N3O3	[M+H]+	L-Citrulline	Amino acids and derivatives	Amino acids and derivatives	372-75-8	3	1.85032e+06	1.90571e+06	1.78735e+06	1.67646e+06	1.82466e+06	2.01002e+06	C00327	ko00220,ko01100,ko01110,ko01230
MWS201414	230.115	70.0659	229.106	C9H15N3O4	[M+H]+	Pro-Asn	Amino acids and derivatives	Amino acids and derivatives	107856-82-6	3	1.81865e+06	2.06857e+06	2.19025e+06	1.78654e+06	1.82095e+06	2.10448e+06	-	-
HJAP024	611.16	593.15	610.154	C27H30O16	[M+H]+	Kaempferol-6,8-di-C-glucoside*	Flavonoids	Flavonols	-	2	1.32675e+06	1.64466e+06	1.63555e+06	1.31927e+06	1502895	1263920	-	-
pmf0139	179.056	59.0139	180.063	C6H12O6	[M-H]-	D-Galactose*	Others	Saccharides	59-23-4	1	5.24569e+06	4.93257e+06	6.28329e+06	5.63755e+06	4.71546e+06	5.01085e+06	C00124	ko00052,ko01100
MW0144707	599.4	581.39	598.391	C26H50N10O6	[M+H]+	Ala-Pro-Arg-Lys-Lys	Amino acids and derivatives	Amino acids and derivatives	-	3	1.10224e+07	21478905	9.99514e+06	1.0643e+07	1.16489e+07	9.68535e+06	-	-
MWS201449	246.145	141.102	245.138	C10H19N3O4	[M+H]+	Asn-Leu	Amino acids and derivatives	Amino acids and derivatives	22601-71-4	3	158427	251985	140787	154068	128109	144606	-	-
HJAP064	565.12	317.08	564.111	C25H24O15	[M+H]+	Isorhamnetin-3-O-(6''-malonyl)glucoside	Flavonoids	Flavonols	-	1	3.76945e+06	5.48224e+06	1.05693e+07	3.60336e+06	4.14993e+06	3.50662e+06	-	-
Wmhp000012	389.14	209.03	390.153	C17H26O10	[M-H]-	Ajugoside	Terpenoids	Monoterpenoids	52916-96-8	3	167930	169889	173517	169138	140502	158296	-	-
Hmmn003964	359.135	197.08	360.142	C16H24O9	[M-H]-	7-Deoxyloganic acid	Terpenoids	Monoterpenoids	22487-36-1	3	54710.6	157497	89505	73231.8	64678.7	61274.1	C11636	ko00902,ko01110
MWSHY0171	579.15	409.092	578.142	C30H26O12	[M+H]+	Procyanidin B2	Tannins	Proanthocyanidins	29106-49-8	3	58486.2	43694.8	68705.3	66370.5	55973.6	57640.8	C17639	-
mws4175	175.02	85.03	176.032	C6H8O6	[M-H]-	D-Glucurono-6,3-lactone	Others	Saccharides	32449-92-6	3	134872	122822	100429	103459	111456	92401.9	C02670	ko00053,ko01100
Hmcn001884	463.09	301.03	464.096	C21H20O12	[M-H]-	6-Hydroxyluteolin 5-glucoside	Flavonoids	Flavones	-	3	1.02072e+07	7.91763e+06	9.89686e+06	5.0495e+06	4.21382e+06	4.47095e+06	-	-
pmd0132	496.34	184.07	495.332	C24H50NO7P	[M+H]+	LysoPC 16:0(2n isomer)	Lipids	LPC	-	1	5.77679e+06	6.19039e+06	6.72011e+06	567834	684279	619407	-	-
Lsjp211261	209.15	149.09	208.146	C13H20O2	[M+H]+	3-Oxo-α-ionol	Others	Others	-	2	1.20175e+07	1.13186e+07	1.26587e+07	1.0484e+07	8.69311e+06	9.50944e+06	-	-
mws3109	168.065	123.044	167.058	C8H9NO3	[M+H]+	4-Hydroxy-L-phenylglycine	Amino acids and derivatives	Amino acids and derivatives	32462-30-9	3	38085	87358.8	55422.8	93370	103375	85769.6	-	-
mws2118	435.13	167.035	436.137	C21H24O10	[M-H]-	Phloretin-2'-O-glucoside (Phlorizin)	Flavonoids	Chalcones	60-81-1	3	72385.8	60252.5	80754.2	44630.1	46131.7	38476	C01604	ko00941,ko01110
Zmtn001464	204.03	160.04	205.037	C10H7NO4	[M-H]-	4,8-Dihydroxyquinoline-2-carboxylic acid	Organic acids	Organic acids	59-00-7	3	1.26265e+06	1.00498e+06	1.16647e+06	912125	923537	776164	C02470	ko00380
Lmtn002565	329.11	167.03	330.095	C14H18O9	[M-H]-	1-O-Vanilloyl-D-Glucose*	Phenolic acids	Phenolic acids	-	3	373290	354500	424245	449226	372112	405591	C20470	-
MWSmce040	153.05	65.0376	152.047	C8H8O3	[M+H]+	Isovanillin	Others	Aldehyde compounds	621-59-0	3	1.24346e+06	1.22182e+06	1.36596e+06	1.22645e+06	1.08214e+06	1.02219e+06	-	-
MWS2413	130.052	58.0302	131.058	C5H9NO3	[M-H]-	N-acetyl-beta-alanine	Amino acids and derivatives	Amino acids and derivatives	3025-95-4	3	97990.5	62649.4	105908	69585.7	73503.6	60931.7	C01073	ko00410
Zmsp000179	326.146	164.092	325.137	C12H23NO9	[M+H]+	2-O-α-D-galactosyl-1-deoxynojirimycin	Alkaloids	Piperidine alkaloids	-	3	67503.6	94083.1	72556	90217.1	79351.8	75215.3	-	-
MWS2032	137.071	65.0389	136.064	C7H8N2O	[M+H]+	6-Methylnicotinamide	Alkaloids	Pyridine alkaloids	6960-22-1	3	749855	620115	751607	657154	715907	591539	-	-
Labp005025	535.14	287.09	534.137	C25H26O13	[M+H]+	Malonyl isoSakuranin	Flavonoids	Flavanones	-	3	2.36249e+06	2.35271e+06	4.4368e+06	1.72043e+06	1.42158e+06	1.57008e+06	-	-
mws0612	195.07	121.03	196.074	C10H12O4	[M-H]-	3,4-Dimethoxyphenyl acetic acid	Phenolic acids	Phenolic acids	93-40-3	2	76052.9	66816.7	68029.8	71744.7	62445.1	75333	-	-
Hmdn001667	463.052	300.99	464.059	C20H16O13	[M-H]-	Ellagic acid-4-O-glucoside	Tannins	Tannin	-	3	382375	594666	573353	424578	430965	361055	-	-
Cmjn004337	401.144	269.104	402.153	C18H26O10	[M-H]-	Benzyl-(2''-O-xylosyl)glucoside	Phenolic acids	Phenolic acids	-	3	306247	295506	384513	280646	338456	301448	-	-
Lmyp004081	579.17	313.07	578.164	C27H30O14	[M+H]+	Isovitexin-2''-O-rhamnoside	Flavonoids	Flavones	-	3	3.29103e+07	3.44277e+07	3.69875e+07	53955400	46742290	45278945	-	-
pmb0764	144.048	113.029	143.041	C6H9NOS	[M+H]+	4-Methyl-5-thiazoleethanol	Others	Others	137-00-8	3	168270	166590	138941	198537	168443	200823	C04294	ko00730,ko01100,ko01240
Zmxn110201	331.102	108.021	332.111	C14H20O9	[M-H]-	2,6-Dimethoxy-4-hydroxyphenol-1-O-ß-D-glucopyranoside	Others	Others	-	3	114940	105320	131305	92775.2	92459.3	108850	-	-
mws0120	258.11	104.107	257.103	C8H20NO6P	[M+H]+	Choline Alfoscerate	Lipids	PC	28319-77-9	3	1.14093e+06	1.32153e+06	929839	1.53785e+06	1.28647e+06	1.33806e+06	C00670	ko00564,ko00565
mws0208	145.05	101.06	146.058	C6H10O4	[M-H]-	Adipic Acid*	Organic acids	Organic acids	124-04-9	3	1.50443e+06	1.65451e+06	1.73812e+06	1.66755e+06	1.78015e+06	1.4695e+06	C06104	ko01100
MWS1983	343.125	89.0254	344.132	C12H24O11	[M-H]-	Maltitol	Others	Saccharides	585-88-6	3	1.65102e+06	1.75752e+06	2.05514e+06	1.64969e+06	1.97959e+06	1.93148e+06	-	-
zjgp122320	163.04	89.04	162.032	C9H6O3	[M+H]+	6-hydroxycoumarin	Lignans and Coumarins	Coumarins	6093-68-1	3	7.75291e+06	7.42361e+06	7.99311e+06	7.28914e+06	6.04091e+06	6.44991e+06	-	-
MW0001709	114.09	79.05	113.084	C6H11NO	[M+H]+	1-Piperidinecarboxaldehyde	Alkaloids	Alkaloids	2591-86-8	3	360125	380691	388486	447951	493866	543548	-	-
Wcsn010496	277.22	233.23	278.225	C18H30O2	[M-H]-	(5E,9E)-6,10,14-Trimethylpentadeca-5,9-Diene-2,13-Dione	Others	Others	-	1	241956	245359	263685	89344.3	103598	107916	-	-
Lmdn001501	373.11	123.05	374.121	C16H22O10	[M-H]-	Gardoside*	Terpenoids	Monoterpenoids	54835-76-6	3	532391	603778	510648	515922	441046	531219	C16963	-
pmb2260	480.308	184.073	479.301	C23H46NO7P	[M+H]+	LysoPC 15:1	Lipids	LPC	-	3	85358.3	112346	104795	40715.9	48875.1	48004.5	-	-
HJN090	433.11	271.06	434.121	C21H22O10	[M-H]-	Butin-7-O-glucoside*	Flavonoids	Flavanones	-	2	837975	750017	702591	583109	622491	511780	-	-
mws0018	203.223	84.081	202.216	C10H26N4	[M+H]+	Spermine	Alkaloids	Alkaloids	71-44-3	3	531855	531789	566050	564439	526396	637615	C00750	ko00330,ko00410,ko00480,ko00770,ko01100,ko01240
MWS20155	361.092	163.039	360.084	C18H16O8	[M+H]+	Rosmarinic acid	Phenolic acids	Phenolic acids	537-15-5	3	102586	148236	130425	141320	171775	153862	C01850	ko00350,ko01100
Lmmn000214	487.167	341.108	488.174	C18H32O15	[M-H]-	Solatriose	Others	Saccharides	528-40-5	3	145677	188754	144390	155266	188897	169928	-	-
MWSHY0010	743.239	435.137	742.232	C33H42O19	[M+H]+	Troxerutin	Flavonoids	Flavones	7085-55-4	3	618193	635592	654673	270550	325915	318879	-	-
mws0671	120.066	74.0601	119.058	C4H9NO3	[M+H]+	L-Homoserine*	Amino acids and derivatives	Amino acids and derivatives	672-15-1	3	4.34882e+06	5.13413e+06	4.29592e+06	4.55216e+06	4.2258e+06	5.1302e+06	C00263	ko00260,ko00270,ko00300,ko00920,ko01100,ko01110,ko01230
Zmhn001793	341.09	179.03	342.095	C15H18O9	[M-H]-	6-O-Caffeoyl-D-glucose*	Phenolic acids	Phenolic acids	-	1	1.0641e+07	6.74539e+06	1.11952e+07	7.70013e+06	7.42869e+06	8.92373e+06	-	-
mws1066	579.172	271.061	580.179	C27H32O14	[M-H]-	Naringenin-7-O-Rutinoside(Narirutin)*	Flavonoids	Flavanones	14259-46-2	3	157399	138996	150860	119509	115717	139033	C09793	-
MWSmce461	102.055	56.0497	101.048	C4H7NO2	[M+H]+	L-Azetidine-2-carboxylic acid*	Alkaloids	Alkaloids	2133-34-8	3	779432	761709	662348	833016	724646	688582	-	-
MWSHY0136	449.108	287.055	448.101	C21H20O11	[M+H]+	Kaempferol-3-O-glucoside (Astragalin)*	Flavonoids	Flavonols	480-10-4	3	5.79817e+07	5.01373e+07	3.29135e+07	1.77113e+07	1.5124e+07	1.83777e+07	C12249	ko00944,ko01110
Lmtp002642	565.16	457.11	564.148	C26H28O14	[M+H]+	Apigenin-8-C-(2''-glucosyl)arabinoside	Flavonoids	Flavones	-	1	6.61803e+06	2428875	6.42758e+06	4.95081e+06	5.32016e+06	6.02788e+06	-	-
Lmmn003323	271.23	225.22	272.235	C16H32O3	[M-H]-	2-Hydroxyhexadecanoic acid	Organic acids	Organic acids	764-67-0	1	303964	274523	303263	315361	284392	257795	-	-
pmp001309	465.1	303.1	464.096	C21H20O12	[M+H]+	6-Hydroxykaempferol-7-O-glucoside	Flavonoids	Flavonols	-	1	43928885	7.65649e+06	12988720	1.20145e+07	13036110	1.46602e+07	-	-
pma3101	256.082	124.039	256.082	C11H14NO6+	[M]+	Nicotinate D-ribonucleoside	Others	Vitamin	17720-18-2	3	2.3756e+07	2.37503e+07	2.15095e+07	2.016e+07	23100598	1.90441e+07	C05841	ko00760,ko01100
pmb0801	346.11	184.06	345.106	C14H19NO9	[M+H]+	4-Pyridoxic acid-O-glucoside	Others	Vitamin	-	1	2.15726e+06	1.8314e+06	2.03903e+06	1.61718e+06	1.76721e+06	1.97619e+06	-	-
Jmbn003202	235.12	59.01	236.126	C10H20O6	[M-H]-	Butyl Beta-D-Fructopyranoside	Others	Saccharides	67884-27-9	2	179867	177135	206110	190289	155353	176437	-	-
pmb0856	480.308	339.289	479.301	C23H46NO7P	[M+H]+	LysoPE 18:1(2n isomer)	Lipids	LPE	-	3	174068	193835	166901	120566	146055	126732	-	-
MWSmce676	149.046	59.0132	150.053	C5H10O5	[M-H]-	D-Arabinose*	Others	Saccharides	10323-20-3	1	318041	406030	312978	323094	263747	291366	C00216	ko00040,ko00053,ko00520,ko01100,ko01250
MWSmce190	148.093	74.0223	147.089	C6H13NO3	[M+H]+	4-Hydroxy-L-Isoleucine	Amino acids and derivatives	Amino acids and derivatives	781658-23-9	3	478351	360556	407080	350766	412038	426988	-	-
pmb0532	349.054	137.046	348.047	C10H13N4O8P	[M+H]+	Inosine 5'-monophosphate	Nucleotides and derivatives	Nucleotides and derivatives	131-99-7	3	120738	25005	123777	84224.4	81699.4	98363.2	C00130	ko00230,ko01100,ko01110,ko01232,ko01240
Lahp002045	503.14	179.03	502.132	C21H26O14	[M+H]+	Glucosyl-5-hydroxychromone-7-O-β-D-glucoside	Others	Chromone	-	2	125625	130267	153882	140192	126879	155594	-	-
Wagp001892	267.14	69.07	266.137	C11H22O7	[M+H]+	(2S,4R)-4-(Beta-D-Glucopyranosyloxy)-2-Pentanol	Others	Others	183744-50-5	1	52433	66439.8	41393.5	44912.3	54475	47247	-	-
Lmbp000123	164.074	56.0495	163.067	C6H13NO2S	[M+H]+	L-Homomethionine	Amino acids and derivatives	Amino acids and derivatives	25148-30-5	3	337988	289243	411818	339496	282968	339914	C17213	ko00966,ko01110,ko01210
pmb2792	293.21	235.17	294.219	C18H30O3	[M-H]-	13-Hydroxy-6,9,11-octadecatrienoic acid	Lipids	Free fatty acids	74784-20-6	2	58651.9	60306.5	61377.8	28107.5	32685.6	34373	-	-
pme1184	268.104	152.057	267.097	C10H13N5O4	[M+H]+	2'-Deoxyguanosine	Nucleotides and derivatives	Nucleotides and derivatives	961-07-9	3	42418	68547.4	55089.7	38965.2	44199.2	47847.9	C00330	ko00230,ko01100,ko01232,ko02010
MWS1860	72.0808	55.0541	71.0735	C4H9N	[M+H]+	Pyrrolidin	Alkaloids	Pyrrole alkaloids	123-75-1	3	4.17408e+06	4.41797e+06	4.48368e+06	4.42609e+06	4.02362e+06	3.60324e+06	-	-
Hmhn003067	325.09	119.05	326.1	C15H18O8	[M-H]-	Phenylpropionic acid-O-β-D-glucopyranoside	Phenolic acids	Phenolic acids	-	1	1.06547e+06	978809	1.00556e+06	946783	1.14978e+06	996492	-	-
Zmmp001429	189.13	86.1	188.116	C8H16N2O3	[M+H]+	Glycyl-L-leucine	Amino acids and derivatives	Amino acids and derivatives	-	1	1.17249e+06	967590	956731	817909	1.00575e+06	921876	-	-
pmp001244	266.139	207.066	266.139	C14H20NO4+	[M]+	Caffeoylcholine	Alkaloids	Phenolamine	87189-10-4	3	282782	379428	356691	358987	295143	311594	-	-
pmp000585	519.11	433.11	518.106	C24H22O13	[M+H]+	Apigenin-7-O-(6''-malonyl)glucoside	Flavonoids	Flavones	86546-87-4	1	386169	340499	452413	278132	228737	271703	C10020	-
mws0655	246.017	96.9696	247.025	C8H10NO6P	[M-H]-	Pyridoxal-5'-phosphate	Others	Vitamin	54-47-7	3	19151.6	12118.9	18817.2	13867.7	11278.1	12985.2	C00018	ko00730,ko00750,ko01100,ko01240
pme2836	178.086	160.076	177.079	C10H11NO2	[M+H]+	5-Hydroxytryptophol	Alkaloids	Plumerane	154-02-9	3	767537	742642	784197	598895	680252	737457	-	-
zjzp122804	423.179	349.105	422.173	C25H26O6	[M+H]+	Cudraflavone C	Flavonoids	Flavones	19275-47-9	3	15451.6	9386.97	4511.44	6357.65	5628.7	5182.81	-	-
Lmhp008589	476.28	335.26	475.27	C23H42NO7P	[M+H]+	LysoPE 18:3(2n isomer)	Lipids	LPE	-	2	653131	827495	640044	212927	259900	251654	-	-
Zblp004882	287.14	121.03	286.12	C17H18O4	[M+H]+	4'-Hydroxy-3,5-dimethoxydihydrochalcone	Flavonoids	Chalcones	-	3	853417	713027	701280	1.21324e+06	1.0898e+06	1.3427e+06	-	-
Lmhp001732	263.14	70.06	262.132	C14H18N2O3	[M+H]+	L-Prolyl-L-Phenylalanine	Amino acids and derivatives	Amino acids and derivatives	13589-02-1	3	800476	774776	813951	599909	582767	704040	-	-
Lahp004665	409.15	247.1	408.142	C20H24O9	[M+H]+	Marmesin galactoside	Lignans and Coumarins	Coumarins	156363-69-8	1	4.39985e+06	4.61863e+06	5.06671e+06	3.68347e+06	4.49703e+06	3.90061e+06	-	-
Hmqp001042	237.13	98.97	236.126	C10H20O6	[M+H]+	Butyl beta-D-glucoside	Others	Saccharides	5391-18-4	3	128757	80831.8	115510	102674	121778	125641	-	-
pmb0489	397.197	147.044	396.19	C19H28N2O7	[M+H]+	N-Glucosyl-p-coumaroylputrescine	Alkaloids	Phenolamine	-	3	137673	121729	137223	119471	98573.1	101860	-	-
pmn001421	337.09	191.06	338.1	C16H18O8	[M-H]-	3-O-p-Coumaroylquinic acid*	Phenolic acids	Phenolic acids	87099-71-6	2	1.46395e+06	1.47344e+06	1.82094e+06	1.68176e+06	1.44894e+06	1.37839e+06	-	-
MWS3020	145.133	86.0961	144.126	C7H16N2O	[M+H]+	N-Acetylcadaverine	Alkaloids	Alkaloids	32343-73-0	3	259599	268132	248511	279740	249046	226668	-	-
Lasp006294	533.13	285.08	532.122	C25H24O13	[M+H]+	Malonyltrifolirhizin	Flavonoids	Other Flavonoids	-	2	8.56086e+06	8.13597e+06	8.519e+06	6.42386e+06	6.15983e+06	7.49893e+06	-	-
MWS2430	241.22	241.21	242.225	C15H30O2	[M-H]-	13-methylmyristic acid	Lipids	Free fatty acids	2485-71-4	1	144945	105572	152702	169383	163133	137917	-	-
mws0987	161.06	115.054	160.052	C10H8O2	[M+H]+	6-MethylCoumarin	Lignans and Coumarins	Coumarins	92-48-8	3	202704	175113	149295	201612	223075	180227	-	-
Hmgp001986	349.06	303.05	348.048	C16H12O9	[M+H]+	5,7,8,3',4'-Pentahydroxy-6-methoxyxanthone	Flavonoids	Other Flavonoids	-	3	838692	794961	852302	780420	829961	671627	-	-
mws1329	463.09	301.04	464.096	C21H20O12	[M-H]-	Quercetin-7-O-glucoside	Flavonoids	Flavonols	491-50-9	1	8.80705e+06	7.83893e+06	1.12411e+07	4.04793e+06	3.29553e+06	3.90329e+06	C12639	-
Lmlp002990	595.166	313.07	594.159	C27H30O15	[M+H]+	Isosaponarin(Isovitexin-4'-O-glucoside)	Flavonoids	Flavones	19416-87-6	3	1.06987e+06	1210125	1.04649e+06	478248	386290	428515	-	-
Zmyn000155	173.105	131.083	174.1	C7H14N2O3	[M-H]-	N-α-Acetyl-L-ornithine	Amino acids and derivatives	Amino acids and derivatives	6205-08-9	3	1.40224e+06	1.84861e+06	1.3138e+06	1.80412e+06	1.52881e+06	1.48852e+06	C00437	ko00220,ko01100,ko01110,ko01210,ko01230
Wafn001957	371.06	209.03	372.069	C15H16O11	[M-H]-	2-O-Caffeoylglucaric Acid	Phenolic acids	Phenolic acids	-	1	458626	456472	498764	375893	317524	310670	C03062	-
Zmzn000079	199.002	78.9585	200.009	C4H9O7P	[M-H]-	D-Erythrose-4-phosphate	Others	Saccharides	585-18-2	3	5.25174e+06	4.50763e+06	3.58732e+06	4.53033e+06	4.26828e+06	3.66264e+06	C00279	ko00030,ko00400,ko00710,ko00750,ko01100,ko01110,ko01200,ko01230,ko01240
pme0266	201.11	139.11	202.12	C10H18O4	[M-H]-	Sebacic acid	Organic acids	Organic acids	111-20-6	1	71519.2	76209	66047.9	55659.7	68918.8	64967.1	C08277	-
mws0097	357.13	151.04	358.142	C20H22O6	[M-H]-	Pinoresinol*	Lignans and Coumarins	Lignans	487-36-5	1	1.11289e+06	979785	779444	635144	734454	597567	C05366	ko00999,ko01100,ko01110
MWSmce001	181.05	107.05	180.042	C9H8O4	[M+H]+	5-Acetylsalicylic acid	Phenolic acids	Phenolic acids	13110-96-8	3	556090	602945	370569	624705	726782	592905	-	-
MW0014259	297.24	279.24	298.251	C18H34O3	[M-H]-	3-Oxooctadecanoic acid	Organic acids	Organic acids	-	3	91048.7	262103	284141	43928.1	50383.4	54560.1	-	-
MWSmce331	102.054	56.0498	101.048	C4H7NO2	[M+H]+	Azetidine-2-carboxylic acid*	Alkaloids	Alkaloids	2517-04-6	3	654631	699451	609708	748478	744393	614884	C08267	-
Zmln002252	223.029	149.025	224.032	C10H8O6	[M-H]-	Sideretin (5,7,8-Trihydroxy-6-methoxycoumarin)	Lignans and Coumarins	Coumarins	-	3	2.6699e+06	2.03376e+06	1.85616e+06	1.59741e+06	1.9297e+06	1.61626e+06	C22007	ko00999,ko01110
Zmgn000503	133.05	71.01	134.058	C5H10O4	[M-H]-	2,3-Dihydroxy-3-Methylbutanoic Acid	Organic acids	Organic acids	1756-18-9	1	9.41492e+06	9.18094e+06	7.77735e+06	5.15599e+06	6.28272e+06	6.25262e+06	C04039	-
Lmmn003398	489.11	285.04	490.111	C23H22O12	[M-H]-	Kaempferol-3-O-(6''-O-acetyl)glucoside	Flavonoids	Flavonols	-	1	2.34724e+07	1.75947e+07	2.244e+07	1.47768e+07	1.19122e+07	1.3045e+07	-	-
Zazp002547	205.1	146.06	204.09	C11H12N2O2	[M+H]+	cyclo-(Gly-Phe)	Amino acids and derivatives	Amino acids and derivatives	10125-07-2	1	4.28968e+06	3.47503e+06	3.60021e+06	3.68972e+06	3.18975e+06	2.99459e+06	-	-
pmf0138	179.056	59.0139	180.063	C6H12O6	[M-H]-	D-Mannose*	Others	Saccharides	3458-28-4	1	5.54481e+06	4.74571e+06	4.59821e+06	4.90105e+06	4.22461e+06	3.98166e+06	C00159	ko00051,ko00052,ko00520,ko01100,ko01250,ko02010
mws1164	179.06	59.01	180.063	C6H12O6	[M-H]-	D-Fructose*	Others	Saccharides	57-48-7	1	4.77152e+06	4.25179e+06	4.70408e+06	4.05306e+06	4.35913e+06	5.00973e+06	C05003	-
mws4170	179.06	59.01	180.063	C6H12O6	[M-H]-	D-Glucose*	Others	Saccharides	50-99-7	1	4.77152e+06	4.25179e+06	4.70408e+06	4.05306e+06	4.35913e+06	5.00973e+06	C00031	ko00010,ko00030,ko00052,ko00500,ko00520,ko00524,ko00901,ko01100,ko01110,ko02010
Lmhn102068	295.05	179.03	296.053	C13H12O8	[M-H]-	2-O-Caffeoylmalic acid	Phenolic acids	Phenolic acids	53755-04-7	2	3.31648e+07	2.97651e+07	3.52693e+07	2.32432e+07	2.88185e+07	2.74924e+07	-	-
MWSprf117	221.09	130.06	220.085	C11H12N2O3	[M+H]+	5-Hydroxy-DL-tryptophan(5-HTP)	Amino acids and derivatives	Amino acids and derivatives	56-69-9	2	319897	277647	289524	233752	286248	243004	C01017	-
MWStz103	399.145	250.094	398.137	C15H22N6O5S	[M+H]+	S-(5'-Adenosyl)-L-methionine	Amino acids and derivatives	Amino acids and derivatives	29908-03-0	3	30192.4	27672.9	35567.9	13896.4	11797.5	14664.1	C00019	ko00261,ko00270,ko00330,ko00908,ko00999,ko01100,ko01110,ko01230,ko01240,ko04122
pme2566	217.08	199.07	218.09	C8H14N2O5	[M-H]-	5-L-Glutamyl-L-amino acid	Amino acids and derivatives	Amino acids and derivatives	5875-41-2	2	212736	239233	240778	198375	205892	166178	-	-
MWSslk183	255.065	181.066	254.058	C15H10O4	[M+H]+	7,8-Dihydroxy-4-phenylcoumarin	Lignans and Coumarins	Coumarins	842-01-3	3	91536.7	73055.5	82965.4	86242.2	68948	78944	-	-
MW0130875	163.07	115.05	162.068	C10H10O2	[M+H]+	2-Methoxycinnamaldehyde	Phenolic acids	Phenolic acids	1504-74-1	3	2.28581e+06	2.448e+06	2.33177e+06	3.62705e+06	3.17878e+06	2.9081e+06	-	-
MW0127920	179.04	135.05	180.042	C9H8O4	[M-H]-	2,5-Dihydroxycinnamic acid	Organic acids	Organic acids	636-01-1	3	5.92397e+06	6.64082e+06	5.78528e+06	5.84626e+06	5.37474e+06	4.66515e+06	-	-
MW0131126	179.04	135.05	180.042	C9H8O4	[M-H]-	3-(3,4-Dihydroxyphenyl)prop-2-enoic acid	Organic acids	Organic acids	-	3	5.92397e+06	6.64082e+06	5.78528e+06	5.84626e+06	5.37474e+06	4.66515e+06	-	-
MWSmce370	151.04	107.05	152.047	C8H8O3	[M-H]-	4-Hydroxyphenylacetic acid*	Phenolic acids	Phenolic acids	156-38-7	3	171945	150903	149356	145452	158802	181470	C00642	ko00350,ko00360,ko01100
mws0255	112.05	95.0239	111.043	C4H5N3O	[M+H]+	Cytosine	Nucleotides and derivatives	Nucleotides and derivatives	71-30-7	3	840961	802369	628809	701016	766501	610906	C00380	ko00240,ko01100,ko01232
Lskp211385	357.132	307.094	356.126	C20H20O6	[M+H]+	Dihydrosesamin	Lignans and Coumarins	Lignans	-	3	123415	101927	142627	88311	105739	109936	-	-
pme3705	193.035	72.9931	194.043	C6H10O7	[M-H]-	D-Glucoronic acid*	Others	Saccharides	6556-12-3	1	395164	426970	388272	390854	466642	487245	C00191	ko00040,ko00053,ko00520,ko00562,ko01100,ko01240,ko01250
MW0168290	245.18	86.09	244.179	C12H24N2O3	[M+H]+	Isoleucylleucine	Amino acids and derivatives	Amino acids and derivatives	-	3	433340	539146	639850	450424	372450	462061	-	-
MWS20633g	262.048	216.043	261.04	C9H12NO6P	[M+H]+	O-phosphate-L-tyrosine	Amino acids and derivatives	Amino acids and derivatives	21820-51-9	3	1.5357e+07	1.61677e+07	1.36469e+07	1.19543e+07	10973968	1.37249e+07	C06501	-
MA10039492	173.009	71.0341	174.016	C6H6O6	[M-H]-	Dehydroascorbic acid	Others	Vitamin	490-83-5	3	140146	129598	130370	129065	105689	107286	C05422	ko00053,ko00480,ko01100
Wmmp000181	445.13	121.03	446.142	C19H26O12	[M-H]-	1´-O-Benzoylsucrose	Others	Saccharides	-	3	48353.8	80784.1	92960.8	76518.7	94718.8	80231.7	-	-
mws0636	313.155	166.086	312.147	C18H20N2O3	[M+H]+	L-Phenylalanyl-L-phenylalanine	Amino acids and derivatives	Amino acids and derivatives	2577-40-4	1	88254.9	28340	94176.5	56665.8	62381.6	49389.2	-	-
Zmdn004719	233.08	189.06	234.089	C13H14O4	[M-H]-	2-(2'-hydroxypropyl)-5-methyl-7-hydroxychromone	Others	Chromone	-	3	1373127	1.24742e+06	1.75054e+06	1.49194e+06	1.55204e+06	1.23919e+06	-	-
MWSmce468	151.04	77.0402	152.047	C8H8O3	[M-H]-	2-hydroxymethyl benzoic acid	Phenolic acids	Phenolic acids	612-20-4	3	88240.8	63670.5	60774.4	63840.8	74716.2	59830.3	C10804	-
Zmgp011111	453.19	341.067	452.183	C26H28O7	[M+H]+	Broussoflavonol B	Flavonoids	Flavones	99217-70-6	3	48414.5	49764.9	53334.8	48559.3	40698	39279.7	-	-
Lmmn003663	329.088	167.036	330.095	C14H18O9	[M-H]-	5-Glucosyloxy-2-Hydroxybenzoic acid methyl ester*	Phenolic acids	Phenolic acids	-	3	581267	594349	556301	529357	607460	482712	-	-
Lmtp003079	609.181	301.071	609.181	C28H33O15+	[M]+	Peonidin-3-O-rutinoside	Flavonoids	Anthocyanidins	-	3	109317	166770	198475	110045	87752.9	105732	-	-
Smcp000882	328.13	310.12	327.132	C15H21NO7	[M+H]+	N-benzoyl-2-aminoethyl-β-D-glucopyranoside	Alkaloids	Alkaloids	-	1	4.63005e+06	4.65079e+06	5.05331e+06	4.06084e+06	3.84621e+06	4.78998e+06	-	-
Lmyn001269	609.15	285.04	610.154	C27H30O16	[M-H]-	Kaempferol-3-O-sophoroside	Flavonoids	Flavonols	19895-95-5	3	70916	63796.7	69550.5	56552.4	56202.7	45647.6	C12634	ko00944,ko01110
pmp001045	331.14	151.11	330.132	C15H22O8	[M+H]+	Bartsioside	Terpenoids	Monoterpenoids	62133-72-6	3	1395140	880448	1.20937e+06	1.80667e+06	1.59452e+06	1427120	-	-
pmf0085	427.393	345.315	426.386	C30H50O	[M+H]+	9,19-Cyclolanost-24-en-3-ol (Cycloartenol)	Terpenoids	Triterpene	469-38-5	3	2.41385e+06	2.75997e+06	4.00568e+06	3.41799e+06	4.19646e+06	4.2577e+06	C01902	ko00100,ko01100,ko01110
MWS5206	181.051	135.045	182.058	C9H10O4	[M-H]-	4-Hydroxyphenyllactic Acid*	Phenolic acids	Phenolic acids	306-23-0	3	57862.5	203485	74284.8	48279.8	49303.6	39462.4	C03672	-
pmb2787	293.212	275.202	294.219	C18H30O3	[M-H]-	9-Oxo-10E,12Z-octadecadienoic acid	Lipids	Free fatty acids	54232-59-6	3	1.10096e+06	1.1164e+06	988173	831111	672399	834271	C14766	ko00591
Zmyn000453	191.02	111.01	192.027	C6H8O7	[M-H]-	Isocitric Acid	Organic acids	Organic acids	320-77-4	1	6.4034e+06	6.11846e+06	6.71816e+06	5.57635e+06	5.02021e+06	4.38822e+06	C00311	ko00020,ko00630,ko01100,ko01110,ko01200,ko01210,ko01230,ko01240
pmb0069	122.06	105.034	121.053	C7H7NO	[M+H]+	Benzamide	Alkaloids	Alkaloids	55-21-0	3	174409	170988	195380	180212	144916	178854	C09815	-
mws0024	169.014	125.024	170.022	C7H6O5	[M-H]-	Gallic acid	Phenolic acids	Phenolic acids	149-91-7	3	1.40834e+06	1.35564e+06	1.30282e+06	1.39056e+06	1.46275e+06	1.15797e+06	C01424	ko00999
pme2024	177.102	160.076	176.095	C10H12N2O	[M+H]+	Serotonin; 5-Hydroxytryptamine*	Alkaloids	Plumerane	50-67-9	1	6.46129e+06	6.22816e+06	6.68428e+06	5.71286e+06	4.66932e+06	4.68233e+06	C00780	ko00380,ko01100,ko01110
pmn001642	503.08	459.1	504.09	C23H20O13	[M-H]-	Kaempferol-3-O-(2''-O-acetyl)glucuronide	Flavonoids	Flavonols	-	3	133928	176379	127148	129229	163964	144651	-	-
Lmsn003318	355.103	175.04	356.111	C16H20O9	[M-H]-	1-O-Feruloyl-β-D-glucose	Phenolic acids	Phenolic acids	7196-71-6	3	185083	122684	168920	169716	172763	138080	C17759	-
mws1212	209.081	177.055	208.074	C11H12O4	[M+H]+	Ferulic acid methyl ester	Phenolic acids	Phenolic acids	2309-07-1	3	247426	177910	224877	150157	191145	174912	-	-
Zmsp000306	134.08	68.0508	133.074	C5H11NO3	[M+H]+	1,4-dideoxy-1,4-imino-D-arabinitol	Alkaloids	Pyrrole alkaloids	-	3	12260.5	13340	12510.9	13111.2	15623	12514.4	-	-
MWSmce613	489.115	264.042	488.107	C14H26N4O11P2	[M+H]+	Citicoline	Nucleotides and derivatives	Nucleotides and derivatives	987-78-0	3	123390	73406.5	43184.8	48882	48402.8	39119.1	C00307	ko00564,ko01100
pmn001704	469.33	423.33	470.34	C30H46O4	[M-H]-	2,3-Dihydroxy-5(6),12(13)-diene-ursolic acid*	Terpenoids	Triterpene	-	3	11182.6	11275.7	14030.7	4574.93	5736.42	5678.46	-	-
Zmsp00487	159.05	72.08	158.044	C4H6N4O3	[M+H]+	Allantoin	Organic acids	Organic acids	97-59-6	2	212354	208126	266111	177123	205112	226862	C01551	-
MWS201476	227.113	110.072	226.107	C9H14N4O3	[M+H]+	Ala-His	Amino acids and derivatives	Amino acids and derivatives	3253-17-6	3	141340	138716	169579	187160	168901	146057	-	-
mws0885	153.019	109.029	154.027	C7H6O4	[M-H]-	2,4-Dihydroxybenzoic acid	Phenolic acids	Phenolic acids	89-86-1	3	6.02301e+06	4.36005e+06	5.14153e+06	4.63176e+06	5.28886e+06	4.13718e+06	-	-
MWS201381	292.13	188.071	291.122	C14H17N3O4	[M+H]+	Ser-Trp	Amino acids and derivatives	Amino acids and derivatives	94421-70-2	1	457117	439101	439172	330925	355740	419058	-	-
HJAP023	773.216	611.168	772.206	C33H40O21	[M+H]+	Kaempferol-6,8-di-C-glucoside-7-O-glucoside	Flavonoids	Flavonols	-	3	1.58616e+06	1.5385e+06	1.46824e+06	1.49776e+06	1.67734e+06	1.30779e+06	-	-
pme3732	244.09	112.05	243.085	C9H13N3O5	[M+H]+	Cytidine	Nucleotides and derivatives	Nucleotides and derivatives	65-46-3	3	1.84628e+06	1.96911e+06	1.52685e+06	2.17362e+06	2.04363e+06	1.69992e+06	C00475	ko00240,ko01100,ko01232,ko02010
MWSmce338	146.08	70.065	145.074	C6H11NO3	[M+H]+	N-Hydroxypipecolic acid	Alkaloids	Piperidine alkaloids	115819-92-6	3	472912	597916	482597	557292	614792	478751	-	-
pme0220	225.148	151.112	224.141	C13H20O3	[M+H]+	Methyl jasmonate	Organic acids	Organic acids	1211-29-6	3	166928	167999	237477	113480	138710	144347	C11512	ko00592,ko01110
Qmxp101501	241.14	137.09	240.136	C13H20O4	[M+H]+	13-Carboxy-blumenol C	Terpenoids	Sesquiterpenoids	-	1	221845	137723	127501	150085	128253	164850	-	-
Lmhn002573	399.09	205.04	400.101	C17H20O11	[M-H]-	Sinapoylglucuronic acid	Phenolic acids	Phenolic acids	-	1	1.84409e+06	1.40305e+06	1.63509e+06	1.51896e+06	1.39315e+06	1.18211e+06	-	-
Hmln002199	505.1	300.03	506.106	C23H22O13	[M-H]-	Quercetin-3-O-(6''-O-acetyl)galactoside	Flavonoids	Flavonols	-	1	1.76675e+06	1.52581e+06	1.4652e+06	757743	763185	937918	-	-
MWSmce388	203.03	147.05	202.027	C11H6O4	[M+H]+	Xanthotoxol; 8-Hydroxypsoralen	Lignans and Coumarins	Coumarins	2009-24-7	2	1.05793e+06	952767	974954	986649	1.25625e+06	1.20867e+06	C00841	ko00999,ko01110
pme1419	164.074	104.071	163.067	C6H13NO2S	[M+H]+	L-Methionine methyl ester	Amino acids and derivatives	Amino acids and derivatives	10332-17-9	1	85429.6	77961.4	81683.3	82395.3	74015.1	63972	-	-
mws2628	118.086	87.0457	117.079	C5H11NO2	[M+H]+	N-Methyl-4-aminobutyric acid	Organic acids	Organic acids	1119-48-8	3	18487.4	11556.9	21277.6	21188.6	22101.7	17319.8	C15987	ko00760,ko01100
Lmqp003432	227.16	121.1	226.157	C13H22O3	[M+H]+	6,9-Dihydroxy-7-megastigmen-3-one	Terpenoids	Sesquiterpenoids	-	2	398399	294962	331353	291914	294164	361786	-	-
Lmmn004912	315.051	271.019	316.058	C16H12O7	[M-H]-	3-O-Methylquercetin	Flavonoids	Flavonols	1486-70-0	3	43420.7	34190.6	50862.8	34816.7	27300.7	33457.1	C04443	ko00944,ko01110
HJN086	449.11	287.06	450.116	C21H22O11	[M-H]-	Eriodictyol-3'-O-glucoside	Flavonoids	Flavanones	-	3	1.5923e+06	1.34321e+06	1.31615e+06	815647	1.03907e+06	1.00248e+06	-	-
zjzp122714	343.118	287.057	342.11	C19H18O6	[M+H]+	Cudraniaxanthone	Flavonoids	Other Flavonoids	38710-42-8	3	4349.71	2812.25	3731.13	32986.3	36152.4	42192.7	-	-
Qagp003587	219.149	131.049	218.142	C13H18N2O	[M+H]+	N-Monocinnamoylputrescine	Alkaloids	Phenolamine	-	3	307000	988718	975620	787148	1.00032e+06	842734	-	-
Lmtn003096	523.22	361.14	524.226	C26H36O11	[M-H]-	Secoisolariciresinol 4-O-glucoside	Lignans and Coumarins	Lignans	-	3	498378	561152	627225	561170	610243	716575	-	-
Hmln001836	651.159	489.118	652.164	C29H32O17	[M-H]-	Kaempferol-3-O-(6''-Acetyl)glucosyl-(1→3)-Galactoside	Flavonoids	Flavonols	-	3	168769	246281	170144	222740	188172	242638	-	-
pmp001080	609.18	301.07	608.174	C28H32O15	[M+H]+	Diosmetin-7-O-Neohesperidoside (Neodiosmin)*	Flavonoids	Flavones	38665-01-9	1	8.8914e+06	18613545	9.35775e+06	3.87554e+06	4.81849e+06	3.91946e+06	-	-
MWSHC20122	223.13	111.08	222.126	C13H18O3	[M+H]+	Dehydrovomifoliol	Terpenoids	Sesquiterpenoids	39763-38-7	2	483014	481397	543042	367938	468240	455566	-	-
mws1179	433.11	271.07	434.121	C21H22O10	[M-H]-	Naringenin-7-O-glucoside (Prunin)	Flavonoids	Flavanones	529-55-5	2	399958	533188	428296	425425	548086	510331	C09099	ko00941
pmb0881	478.293	337.274	477.286	C23H44NO7P	[M+H]+	LysoPE 18:2	Lipids	LPE	-	3	53538.7	55226.1	72050.3	46398.3	36037.4	40224.6	-	-
pmb1650	279.232	149.132	278.225	C18H30O2	[M+H]+	Octadeca-11E,13E,15Z-trienoic acid	Lipids	Free fatty acids	25575-00-2	3	9.18101e+06	7.88989e+06	5.43776e+06	8.10195e+06	6.37871e+06	6.77064e+06	-	-
Hmpp002612	611.16	287.05	610.153	C27H30O16	[M+H]+	Luteolin-7-O-gentiobioside*	Flavonoids	Flavones	-	2	278135	214169	295609	113005	146085	129750	-	-
mws0467	165.056	119.05	166.063	C9H10O3	[M-H]-	3-(4-Hydroxyphenyl)-propionic acid*	Phenolic acids	Phenolic acids	501-97-3	3	948668	952149	1.05553e+06	749584	944631	943218	C01744	-
MWS0274	165.056	119.05	166.063	C9H10O3	[M-H]-	DL-3-Phenyllactic acid*	Organic acids	Organic acids	828-01-3	3	948668	952149	1.05553e+06	749584	944631	943218	-	-
Lmbn005172	165.056	119.05	166.063	C9H10O3	[M-H]-	2,6-Dimethoxybenzaldehyde*	Others	Aldehyde compounds	3392-97-0	3	948668	952149	1.05553e+06	749584	944631	943218	-	-
Wayp004564	182.08	136.08	181.074	C9H11NO3	[M+H]+	4-hydroxy-4-(3-pyridyl)-butanoic acid	Alkaloids	Pyridine alkaloids	15569-97-8	1	1.58654e+06	1.42952e+06	1.69087e+06	1.01216e+06	1.19798e+06	937848	C19579	-
mws1641	165.041	120.021	164.033	C6H4N4O2	[M+H]+	Lumazine	Nucleotides and derivatives	Nucleotides and derivatives	487-21-8	3	78410.6	93118.3	79616.2	79558.3	67384.8	87133.8	C03212	-
mws5041	189.12	86.1	188.116	C8H16N2O3	[M+H]+	L-Glycyl-L-isoleucine*	Amino acids and derivatives	Amino acids and derivatives	19461-38-2	1	529631	514460	650691	385360	362941	461342	-	-
pme1266	167.056	124.05	166.049	C6H6N4O2	[M+H]+	3-Methylxanthine	Nucleotides and derivatives	Nucleotides and derivatives	1076-22-8	3	50669.1	92739.1	92613.6	71102	54943.7	65117.9	C16357	ko00232,ko01100,ko01110
mws0028	167.03	108.02	168.042	C8H8O4	[M-H]-	Vanillic acid	Phenolic acids	Phenolic acids	121-34-6	1	9.75875e+06	4.59609e+06	2.84382e+06	4.47287e+06	4.3277e+06	3.49753e+06	C06672	-
ML10180524	244.09	112.05	243.085	C9H13N3O5	[M+H]+	Cytarabine	Nucleotides and derivatives	Nucleotides and derivatives	147-94-4	3	3.12626e+06	3.3543e+06	4.43237e+06	2.64615e+06	3.22321e+06	3.40926e+06	C02961	-
pmb3074	337.09	191.06	338.1	C16H18O8	[M-H]-	5-O-p-Coumaroylquinic acid*	Phenolic acids	Phenolic acids	1899-30-5	2	1.35681e+06	1.18144e+06	1.14166e+06	1.10609e+06	1.41742e+06	1.3685e+06	C12208	ko00940,ko00941,ko00945,ko01110
mws1033	303.086	153.018	302.079	C16H14O6	[M+H]+	Homoeriodictyol	Flavonoids	Flavanones	446-71-9	3	116838	83205.6	79240.3	73911.2	69846.7	88959.4	C09756	ko00941
zjzp122723	303.085	153.017	302.079	C16H14O6	[M+H]+	1-Hydroxy-3,6,7-trimethoxyxanthone	Flavonoids	Other Flavonoids	-	3	116838	83205.6	79240.3	73911.2	69846.7	88959.4	-	-
MWS0687	153.07	108.04	152.059	C7H8N2O2	[M+H]+	1-Methyl-6-Oxo-1,6-Dihydropyridine-3-Carboxamide	Alkaloids	Pyridine alkaloids	701-44-0	3	305360	291175	295900	260410	305077	236679	-	-
MWStz211	261.125	120.082	260.116	C14H16N2O3	[M+H]+	Cyclo(L-Phe-trans-4-hydroxy-L-Pro)	Amino acids and derivatives	Amino acids and derivatives	118477-06-8	3	943115	718480	847520	536010	470780	611315	-	-
MWSHY0042	183.065	140.047	182.058	C9H10O4	[M+H]+	Syringaldehyde; 4-Hydroxy-3,5-Dimethoxybenzaldehyde	Others	Aldehyde compounds	134-96-3	3	256094	351896	125002	257550	315555	250225	-	-
MWSmce203	341.117	73.0319	342.116	C12H22O11	[M-H]-	D-Cellobiose	Others	Saccharides	528-50-7	3	808534	926351	929111	793228	1.02939e+06	894868	-	-
pme0278	191.103	128.071	190.095	C7H14N2O4	[M+H]+	2,6-Diaminooimelic acid	Organic acids	Organic acids	583-93-7	3	197268	219172	180560	242631	206529	188010	C00666	ko00300,ko00470,ko01100,ko01110,ko01230
MWSmce264	153.06	123.05	154.063	C8H10O3	[M-H]-	Hydroxytyrosol	Phenolic acids	Phenolic acids	10597-60-1	3	981126	851452	912977	780574	948452	746612	-	-
MWS00353g	178.088	86.0245	179.095	C10H13NO2	[M-H]-	Alpha-Methyl-DL-Phenylalanine	Amino acids and derivatives	Amino acids and derivatives	1132-26-9	3	19322.5	23773.7	21414	22573	23287.2	18090.4	-	-
pme2755	222.097	138.055	221.09	C8H15NO6	[M+H]+	N-Acetyl-D-glucosamine	Others	Saccharides	7512-17-6	3	219622	103921	193982	170376	160168	205189	C00140	ko00520,ko01100,ko01250,ko02010
mws0675	335.064	123.055	334.057	C11H15N2O8P	[M+H]+	β-Nicotinamide mononucleotide	Nucleotides and derivatives	Nucleotides and derivatives	1094-61-7	3	193546	193974	182262	131751	123273	158228	C00455	ko00760,ko01100
pma0633	349.26	203.223	348.252	C19H32N4O2	[M+H]+	N-p-Coumaroylspermine	Alkaloids	Phenolamine	130210-35-4	3	127297	107312	138184	117346	138952	107527	-	-
MW0150179	497.2	453.21	496.196	C25H28N4O7	[M+H]+	Glu-Trp-Tyr	Amino acids and derivatives	Amino acids and derivatives	-	3	7.07728e+07	7.01155e+07	6.7434e+07	7.44601e+07	6.29803e+07	5.75665e+07	-	-
MWSslk233	287.091	203.042	286.084	C16H14O5	[M+H]+	Oxypeucedanin	Lignans and Coumarins	Coumarins	737-52-0	3	318193	289866	354591	203546	184718	155706	C09282	-
mws0597	190.051	146.061	191.058	C10H9NO3	[M-H]-	5-Hydroxyindole-3-acetic acid	Alkaloids	Plumerane	54-16-0	3	141359	205742	378766	202635	159705	164960	C05635	ko00380,ko01100
Lmcp005645	331.081	287.052	330.074	C17H14O7	[M+H]+	Quercetin-3,4'-Dimethyl Ether	Flavonoids	Flavonols	33429-83-3	3	228085	203990	157158	138554	178753	149585	-	-
MWStz152	206.08	118.07	205.074	C11H11NO3	[M+H]+	2-(Acetylamino)-3-phenyl-2-propenoic acid*	Alkaloids	Alkaloids	5469-45-4	3	1.10807e+06	1.0704e+06	1.0225e+06	1.09694e+06	856391	904311	-	-
mws1521	285.098	121.029	286.105	C13H18O7	[M-H]-	Salicin	Phenolic acids	Phenolic acids	138-52-3	3	30671	39950.6	35367.4	32871.9	37553.1	28715.4	C01451	ko00010
mws0193	190.12	84.08	189.111	C7H15N3O3	[M+H]+	L-Homocitrulline	Amino acids and derivatives	Amino acids and derivatives	1190-49-4	3	727959	536638	584585	496269	607829	646763	C02427	-
Lskp211268	179.07	119.05	178.063	C10H10O3	[M+H]+	3-Ethyl-7-hydroxyphthslide	Others	Others	-	1	5.26338e+06	4.52674e+06	4.10533e+06	4.74165e+06	5.28767e+06	4.03132e+06	-	-
pme2165	155.01	111.02	156.017	C5H4N2O4	[M-H]-	Orotic acid (Vitamin B13)	Others	Vitamin	65-86-1	3	301433	284806	145534	161375	157361	125027	C00295	ko00240,ko01100,ko01240
MW0006821	223.1	149.02	222.089	C12H14O4	[M+H]+	Diethyl phthalate	Phenolic acids	Phenolic acids	-	3	1.38349e+06	1.14238e+06	1.0959e+06	1.50911e+06	1.29934e+06	1.15382e+06	C14175	-
Lmnp002413	595.17	449.11	594.159	C27H30O15	[M+H]+	Luteolin-6-C-glucoside-7-O-rhamnoside	Flavonoids	Flavones	-	1	6.54498e+06	6.9654e+06	8.0703e+06	5.17524e+06	4.04954e+06	4.22061e+06	-	-
pme0257	111.02	67.0302	112.027	C4H4N2O2	[M-H]-	Uracil	Nucleotides and derivatives	Nucleotides and derivatives	66-22-8	3	135754	115322	114840	95782.4	85510.7	72845.3	C00106	ko00240,ko00410,ko00770,ko01100,ko01232
pma1303	492.308	184.073	491.301	C24H46NO7P	[M+H]+	LysoPC 16:2	Lipids	LPC	-	3	105081	108944	122755	48063.2	56634.3	63229.2	-	-
MWS2040	94.9808	79.9609	95.9881	CH4O3S	[M-H]-	Methanesulfonic acid	Organic acids	Organic acids	75-75-2	3	874942	1.13182e+06	836120	1.10789e+06	1.42654e+06	1.17331e+06	C11145	ko00920,ko01100
Lmcp004436	611.139	287.055	611.139	C30H27O14+	[M]+	Cyanidin-3-O-(6''-O-caffeoyl)glucoside	Flavonoids	Anthocyanidins	-	3	314931	261871	226855	186111	195606	149766	-	-
mws1383	243.088	145.076	242.08	C12H10N4O2	[M+H]+	Lumichrome	Alkaloids	Alkaloids	1086-80-2	3	79720.7	59392.8	74353.4	54862.1	67555.9	52833.8	C01727	ko00740
Lmsp004851	291.086	123.044	290.079	C15H14O6	[M+H]+	3-Hydroxyphloretin	Flavonoids	Chalcones	57765-66-9	3	342025	304842	211652	249378	326405	308537	-	-
MWS20672	366.166	120.081	365.159	C17H23N3O6	[M+H]+	Glu-Phe-Ala	Amino acids and derivatives	Amino acids and derivatives	-	3	57878.4	67751.4	75749.3	48728	41814	55091.3	-	-
Lhyp111010	301.03	273.04	300.027	C15H8O7	[M+H]+	Demethylwedelolactone	Lignans and Coumarins	Coumarins	6468-55-9	2	1.34494e+07	1.29732e+07	1.5434e+07	8.41369e+06	1.07765e+07	1.0792e+07	-	-
pme3146	145.062	102.055	146.069	C5H10N2O3	[M-H]-	β-Ureidoisobutyric acid	Organic acids	Organic acids	2905-86-4	3	71875.3	72924.4	84467.8	72508.1	56452.6	72213.2	C05100	-
mws4052	102.055	56.0496	101.048	C4H7NO2	[M+H]+	1-Aminocyclopropane-1-carboxylic acid*	Organic acids	Organic acids	22059-21-8	3	264248	267291	235316	326740	265248	255295	C01234	ko00270,ko01100,ko01110
Jmbn003691	311.11	59.01	312.121	C15H20O7	[M-H]-	3,4-dihydroxy-allylbenzene-3-O-β-D-glucopyranoside	Phenolic acids	Phenolic acids	-	2	741650	643386	734996	867376	1.14416e+06	1.0533e+06	-	-
Zasn010461	269.25	269.25	270.256	C17H34O2	[M-H]-	Pentadecanoic acid,14-methyl-,methyl ester	Others	Others	5129-60-2	3	61068.5	61496.1	58682.1	50043.6	59255.3	66144.9	-	-
MW0150162	515.21	471.23	514.202	C20H30N6O10	[M+H]+	Glu-Thr-His-Glu	Amino acids and derivatives	Amino acids and derivatives	-	3	2.15169e+06	2.11432e+06	2.34189e+06	1.60742e+06	2.07422e+06	2.0623e+06	-	-
mws0895	431.1	269.05	432.106	C21H20O10	[M-H]-	Genistein-7-O-Glucoside (Genistin)	Flavonoids	Isoflavones	529-59-9	3	139537	100460	229081	113542	110286	141212	C09126	ko00943
mws0230	120.066	74.0601	119.058	C4H9NO3	[M+H]+	L-Threonine*	Amino acids and derivatives	Amino acids and derivatives	72-19-5	3	7.46684e+06	7.69297e+06	6.83501e+06	8.76359e+06	9.1287e+06	6.9665e+06	C00188	ko00260,ko00261,ko00290,ko00470,ko00860,ko00970,ko01100,ko01110,ko01230,ko02010
Lmrj002244	195.113	70.06	194.106	C10H14N2O2	[M+H]+	Cyclo(Pro-Pro)	Amino acids and derivatives	Amino acids and derivatives	6708-06-1	3	204545	439015	210562	157689	208922	191505	-	-
Lmnn002886	477.14	179.03	478.147	C23H26O11	[M-H]-	1'-O-(3,4-Dihydroxyphenethyl)-O-caffeoyl-glucoside	Phenolic acids	Phenolic acids	-	3	181983	202546	115423	90093.9	117824	97815.8	-	-
Lmdn001560	345.12	165.06	346.126	C15H22O9	[M-H]-	6-DeoxyCatalpol	Terpenoids	Monoterpenoids	99499-99-7	2	123534	139192	141308	150426	113466	130914	-	-
mws1454	477.14	315.086	478.147	C23H26O11	[M-H]-	Persicoside	Flavonoids	Flavanones	28978-03-2	3	118690	91534.9	133206	74379.2	98803.8	86221.4	-	-
Hmpn005101	451.123	289.07	452.132	C21H24O11	[M-H]-	Sieboldin	Flavonoids	Chalcones	18777-73-6	3	56357.4	106835	96184.9	112140	84794.4	95493.2	-	-
pmn001375	535.182	373.129	536.189	C26H32O12	[M-H]-	1-Hydroxypinoresinol-1-O-Glucoside	Lignans and Coumarins	Lignans	81495-71-8	3	99214.9	113484	75315	76574.9	100298	83006	-	-
MWSmce709	130.06	103.05	129.058	C9H7N	[M+H]+	Isoquinoline	Alkaloids	Isoquinoline alkaloids	119-65-3	3	3.18755e+06	3.17714e+06	3.20132e+06	3.12846e+06	3.18068e+06	2.43956e+06	C06323	-
mws0489	149.024	77.0397	150.032	C8H6O3	[M-H]-	Benzoylformic acid	Organic acids	Organic acids	611-73-4	3	122641	120780	92975.6	78116.1	101002	101135	C02137	ko00360,ko01100
MWSHY0116	611.2	303.09	610.19	C28H34O15	[M+H]+	Hesperetin-7-O-rutinoside (Hesperidin)*	Flavonoids	Flavanones	520-26-3	3	1195000	952483	1.96309e+06	618010	584902	467513	C09755	-
MWSHY0019	611.2	303.09	610.19	C28H34O15	[M+H]+	Hesperetin-7-O-neohesperidoside(Neohesperidin)*	Flavonoids	Flavanones	13241-33-3	3	1195000	952483	1.96309e+06	618010	584902	467513	C09806	ko00941
MWStz255	245.128	120.083	244.121	C14H16N2O2	[M+H]+	Cyclo(Pro-Phe)*	Amino acids and derivatives	Amino acids and derivatives	3705-26-8	3	222472	192043	203618	194309	185661	240534	C11847	-
pme3163	289.033	96.9696	290.04	C7H15O10P	[M-H]-	D-Sedoheptuiose 7-phosphate	Others	Saccharides	2646-35-7	3	100295	87460.7	92029.2	117001	87632.7	105599	-	-
pma1751	286.092	124.039	285.085	C12H15NO7	[M+H]+	N-(beta-D-Glucosyl)nicotinate	Others	Vitamin	-	3	288245	286555	318166	280169	239527	210630	-	-
MW0146047	539.25	323.26	538.239	C23H34N6O9	[M+H]+	Asp-Asn-Tyr-Lys	Amino acids and derivatives	Amino acids and derivatives	-	3	202246	198646	143311	281007	240155	320714	-	-
Wagp005572	495.15	247.1	494.142	C23H26O12	[M+H]+	Marmesin O-malonyl glucoside	Lignans and Coumarins	Coumarins	-	1	7.4164e+06	6.63354e+06	6.74789e+06	7.37262e+06	6.27645e+06	5.54227e+06	-	-
mws1593	665.215	161.044	666.222	C24H42O21	[M-H]-	D-Maltotetraose	Others	Saccharides	34612-38-9	3	34654.1	28250.8	26265.8	40440.5	39982.2	30937.1	C02052	-
Zmjp003463	565.156	433.114	564.148	C26H28O14	[M+H]+	Vitexin-2''-O-xyloside	Flavonoids	Flavones	-	3	1.0891e+07	1.07773e+07	1.29308e+07	9.29357e+06	7.50658e+06	1.00144e+07	-	-
mws2108	353.09	191.06	354.095	C16H18O9	[M-H]-	Cryptochlorogenic acid (4-O-Caffeoylquinic acid)*	Phenolic acids	Phenolic acids	905-99-7	1	5.50922e+06	6.46921e+06	6.51221e+06	5.21257e+06	3.89558e+06	4.75913e+06	-	-
MW0153781	417.11	152.01	418.12	C20H22N2O6S	[M-H]-	Met-HoPhe-OH	Amino acids and derivatives	Amino acids and derivatives	-	3	551460	454417	568887	465078	431669	567953	-	-
mws1429	223.134	161.096	224.141	C13H20O3	[M-H]-	Vomifoliol (Blumenol A)	Terpenoids	Monoterpenoids	189351-15-3	3	166832	157280	183019	133481	160890	121526	C04166	-
mws0009	179.07	91.06	178.063	C10H10O3	[M+H]+	Coniferaldehyde	Phenolic acids	Phenolic acids	20649-42-7	3	2.07488e+06	1.61271e+06	1.58583e+06	1.64939e+06	1.23078e+06	1.42213e+06	C02666	ko00940,ko01100,ko01110
pmp001285	149.02	65.04	148.016	C8H4O3	[M+H]+	Phthalic anhydride	Phenolic acids	Phenolic acids	85-44-9	1	1.20829e+07	7.5138e+06	1.29313e+07	1.13411e+07	1.24759e+07	9.29127e+06	-	-
mws5038	341.109	89.0249	342.116	C12H22O11	[M-H]-	Isomaltulose*	Others	Saccharides	13718-94-0	1	914409	850389	815573	684270	747662	906122	C01742	-
MWSslk186	405.14	165.056	406.147	C17H26O11	[M-H]-	8-O-Acetylharpagide	Terpenoids	Monoterpenoids	6926-14-3	3	101627	83114.7	56600.3	63578.6	82440.1	65635.5	-	-
Lafp004533	457.21	209.15	456.199	C22H32O10	[M+H]+	(6R,9R)-3-Oxo-α-ionol-β-D-malonyl-glucoside	Terpenoids	Sesquiterpenoids	-	1	3.61059e+06	2.41225e+06	3.166e+06	2.85728e+06	2.13592e+06	2.4278e+06	-	-
MWS201432	313.122	104.053	312.114	C14H20N2O4S	[M+H]+	Met-Tyr	Amino acids and derivatives	Amino acids and derivatives	13589-04-3	3	40582.7	40781	60664	43567.5	32892.3	42530.7	-	-
mws0346	165.056	106.042	166.063	C9H10O3	[M-H]-	3-(3-Hydroxyphenyl)-propionic acid	Phenolic acids	Phenolic acids	621-54-5	3	118806	86121.3	104557	117105	88932.8	94614.2	C11457	ko00360,ko01100
pmp000236	565.155	367.1	564.148	C26H28O14	[M+H]+	Isovitexin-8-O-xyloside	Flavonoids	Flavones	-	3	9596335	5.24578e+06	10929205	1.17473e+07	9.13659e+06	9194380	-	-
MWSslk120	208.097	120.082	207.089	C11H13NO3	[M+H]+	N-Acetyl-DL-phenylalanine	Amino acids and derivatives	Amino acids and derivatives	2901-75-9	3	1.27624e+06	1.07072e+06	1.29324e+06	848355	1.14686e+06	1.03567e+06	-	-
Wmlp000056	183.064	91.054	182.058	C9H10O4	[M+H]+	3,5-Dimethoxy-4-hydroxybenzaldehyde	Others	Aldehyde compounds	-	3	92083.7	117770	124807	99312.1	93472.1	73956.7	-	-
MW0158636	497.2	453.21	496.196	C25H28N4O7	[M+H]+	Tyr-Trp-Glu	Amino acids and derivatives	Amino acids and derivatives	-	3	969865	947695	967446	845073	1.11406e+06	897915	-	-
Lmcp004369	331.081	287.054	330.074	C17H14O7	[M+H]+	Quercetin-3',4'-dimethyl ether	Flavonoids	Flavonols	3306-29-4	3	801251	813597	792183	949328	704767	886641	-	-
MWStz202	353.15	177.06	352.142	C20H20N2O4	[M+H]+	cis-Moschamine	Alkaloids	Plumerane	193224-24-7	3	105023	77446	96959.1	92878.1	106946	79050.3	-	-
MWS201461	288.204	175.119	287.196	C12H25N5O3	[M+H]+	Leu-Arg	Amino acids and derivatives	Amino acids and derivatives	26607-15-8	3	894998	827285	1.01255e+06	907868	934634	1.18286e+06	-	-
mws0046	579.172	271.062	580.179	C27H32O14	[M-H]-	Naringenin-7-O-Neohesperidoside(Naringin)*	Flavonoids	Flavanones	10236-47-2	3	554569	427659	576372	536713	408962	428074	C09789	ko00941
mws1024	147.045	129.035	148.052	C9H8O2	[M-H]-	p-Coumaraldehyde	Phenolic acids	Phenolic acids	2538-87-6	3	32195.9	31645.5	33144.2	21911.4	29177.4	23841.7	C05608	ko00940,ko01100,ko01110
MW0149768	409.16	391.16	408.15	C15H28N4O5S2	[M+H]+	Gln-Met-Met	Amino acids and derivatives	Amino acids and derivatives	-	3	3.10413e+06	2.09567e+06	3.0975e+06	2.50669e+06	3.10596e+06	2.34382e+06	-	-
Lmbp002962	209.047	194.024	208.037	C10H8O5	[M+H]+	Isofraxetin	Lignans and Coumarins	Coumarins	50656-75-2	3	131285	179471	179242	169917	128331	136508	-	-
MWS5238	165.09	91.05	164.084	C10H12O2	[M+H]+	4-Phenylbutyric acid	Organic acids	Organic acids	1821-12-1	3	1.09557e+06	1.15786e+06	1.30113e+06	830594	1.13e+06	992080	-	-
MWSmce324	187.04	131.05	186.032	C11H6O3	[M+H]+	Psoralen	Lignans and Coumarins	Coumarins	66-97-7	1	1.97858e+07	1.88626e+07	1.82383e+07	1.85555e+07	1.46985e+07	1.41105e+07	C09305	ko00999,ko01110
mws0920	301.035	151.004	302.043	C15H10O7	[M-H]-	Tricetin (5,7,3',4',5'-Pentahydroxyflavone)	Flavonoids	Flavones	520-31-0	3	57327.4	64554.8	63378.3	56503	65581.2	48211.9	C10192	ko00941
pme3400	447.13	285.07	446.121	C22H22O10	[M+H]+	Biochanin A-7-O-glucoside (Sissotrin)*	Flavonoids	Isoflavones	5928-26-7	1	1.46149e+06	1.57517e+06	1.31758e+06	1.15155e+06	1.22652e+06	906078	C05376	ko00943
MWStz073	102.055	84.0468	101.048	C4H7NO2	[M+H]+	5-Hydroxy-2-pyrrolidinone	Alkaloids	Pyrrole alkaloids	62312-55-4	3	393602	589504	609938	750724	657011	550582	-	-
pme3081	169.097	134.06	168.09	C8H12N2O2	[M+H]+	4-(Aminomethyl)-5-(hydroxymethyl)-2-methylpyridin-3-ol	Alkaloids	Alkaloids	85-87-0	3	129006	168227	133819	151623	159368	118038	C00534	ko00750,ko01100
Lazn003443	595.16	449.11	594.159	C27H30O15	[M+H]+	Orientin 2''-Rhamnoside	Flavonoids	Flavones	-	1	5.03036e+06	7.54766e+06	6.83687e+06	5.10074e+06	5.06145e+06	6.56633e+06	-	-
mws0232	377.15	243.09	376.138	C17H20N4O6	[M+H]+	Riboflavin (Vitamin B2)	Others	Vitamin	83-88-5	1	9.76251e+06	8.0692e+06	9.52877e+06	7.06973e+06	6.76961e+06	8.93478e+06	C00255	ko00740,ko01100,ko01110,ko01240,ko02010
MWS201483	279.13	120.08	278.127	C14H18N2O4	[M+H]+	Phe-Hyp	Amino acids and derivatives	Amino acids and derivatives	90965-82-5	3	89913.6	86297.8	107741	94570.9	91240.7	70231	-	-
MWSslk172	247.061	217.024	246.053	C13H10O5	[M+H]+	Isopimpinellin	Lignans and Coumarins	Coumarins	482-27-9	3	43794.3	53446.8	50407	30256.8	26907.7	36428.4	C02162	ko00999,ko01110
Lmzp002365	465.139	303.09	464.132	C22H24O11	[M+H]+	Hesperetin-7-O-glucoside	Flavonoids	Flavanones	31712-49-9	3	1.63705e+06	1.31113e+06	2.01216e+06	1.19146e+06	1.03817e+06	869640	C16422	ko00941
pme1210	150.058	61.0106	149.051	C5H11NO2S	[M+H]+	L-Methionine	Amino acids and derivatives	Amino acids and derivatives	63-68-3	1	346663	302230	311722	294850	324041	236624	C00073	ko00270,ko00470,ko00966,ko00970,ko00999,ko01100,ko01110,ko01210,ko01230,ko01240
Zmhn001883	329.088	209.042	330.095	C14H18O9	[M-H]-	Vanillic acid-4-O-glucoside	Phenolic acids	Phenolic acids	32142-31-7	3	68329.2	54553.9	48046.4	50715.7	41322.2	56684.7	-	-
pmp000587	535.11	287.05	534.101	C24H22O14	[M+H]+	Luteolin-7-O-(6''-malonyl)glucoside*	Flavonoids	Flavones	-	1	4.43221e+07	3.30799e+07	3.24933e+07	2.10707e+07	1.97824e+07	2.6394e+07	C10103	-
mws0805	308.099	87.0088	309.106	C11H19NO9	[M-H]-	N-Acetylneuraminic acid	Amino acids and derivatives	Amino acids and derivatives	131-48-6	3	29769.7	37995.8	36581.1	23118.9	31738.5	28211.9	C00270	ko00520,ko01100,ko01250
MWS4312	101.026	55.0182	102.032	C4H6O3	[M-H]-	Butanone acid	Organic acids	Organic acids	600-18-0	3	31092	25821	36070.9	27683.1	22234.2	20664.9	-	-
Zmgn003633	211.13	183.14	212.141	C12H20O3	[M-H]-	12-Oxo-10E-Dodecenoic Acid	Lipids	Free fatty acids	65410-38-0	2	40027	42140.2	43672.3	63731.5	62927.5	47563.5	C16309	ko00592,ko01110
MWSslk111	327.207	309.197	326.199	C20H26N2O2	[M+H]+	Hydroquinine	Alkaloids	Quinoline alkaloids	522-66-7	3	366404	351411	237788	311013	342202	420086	-	-
MW0104373	213.11	169.12	214.121	C11H18O4	[M-H]-	2-[1-(Carboxymethyl)-3-methylcyclohexyl]acetic acid	Organic acids	Organic acids	5345-12-0	3	614223	506453	712331	458713	500820	618386	-	-
Lhmp122205	301.14	245.09	300.136	C18H20O4	[M+H]+	5-O-Methyllatifolin	Others	Others	-	1	224649	114031	185352	118322	87743.4	115404	-	-
Zmbp003590	425.14	263.09	424.137	C20H24O10	[M+H]+	Rutarin	Lignans and Coumarins	Coumarins	20320-81-4	1	1.55788e+07	2.17702e+07	1.86489e+07	39724240	37438190	2.91205e+07	-	-
Hmmp001310	188.07	118.07	187.063	C11H9NO2	[M+H]+	3-Indoleacrylic acid*	Alkaloids	Plumerane	1204-06-4	1	1.71724e+06	1.31652e+06	1.48014e+06	1.50489e+06	1.15925e+06	1.15528e+06	C21283	-
MWS201387	289.162	175.119	288.155	C10H20N6O4	[M+H]+	Asn-Arg	Amino acids and derivatives	Amino acids and derivatives	2478-01-5	3	342106	272179	350141	244251	332607	275339	-	-
pme2732	187.075	141.07	186.068	C12H10O2	[M+H]+	1-Naphthylacetic acid	Organic acids	Organic acids	86-87-3	3	131680	132686	147916	144927	116898	107490	C13014	-
MWSmce460	100.075	56.0499	99.0684	C5H9NO	[M+H]+	2-Piperidone	Alkaloids	Piperidine alkaloids	675-20-7	3	737732	613695	562298	638780	463315	567847	-	-
Zblp001009	272.11	110.06	271.106	C12H17NO6	[M+H]+	3-pyridine-methanol-O-β-D-glucopyranosyl	Alkaloids	Pyridine alkaloids	-	1	3.28528e+06	3.05715e+06	2.13185e+06	2.68845e+06	2.77211e+06	2.04445e+06	-	-
Lhqp101816	187.04	131.05	186.032	C11H6O3	[M+H]+	Bakuchicin	Lignans and Coumarins	Coumarins	4412-93-5	1	1.80434e+07	1.81567e+07	1.65513e+07	1.75161e+07	13429706	1.34435e+07	-	-
mws0221	241.031	151.983	240.024	C6H12N2O4S2	[M+H]+	L-Cystine	Amino acids and derivatives	Amino acids and derivatives	56-89-3	3	212144	150312	187397	197953	207524	152059	C00491	ko00270,ko01100,ko02010
MWS201448	244.129	130.05	243.122	C10H17N3O4	[M+H]+	Pro-Gln	Amino acids and derivatives	Amino acids and derivatives	18668-08-1	3	77509.3	49737.9	18842.5	21905.5	28568.2	21893.5	-	-
pmd0160	454.293	313.274	453.286	C21H44NO7P	[M+H]+	LysoPE 16:0(2n isomer)	Lipids	LPE	-	3	479016	621711	512621	99212.4	103894	76084.1	-	-
Hmyp002656	222.08	130.06	221.069	C11H11NO4	[M+H]+	Methyl dioxindole-3-acetate	Alkaloids	Plumerane	57061-18-4	3	136499	123732	82236.9	102806	132350	141127	-	-
mws4173	207.065	192.045	206.058	C11H10O4	[M+H]+	5,7-Dimethoxycoumarin (Limettin)(Citropten)	Lignans and Coumarins	Coumarins	487-06-9	3	77798	58974.8	62074.2	43873.7	59705.5	57765.1	-	-
MWSHY0031	447.09	271.061	446.085	C21H18O11	[M+H]+	Apigenin-7-O-glucuronide	Flavonoids	Flavones	29741-09-1	3	112868	40010	120804	121400	166521	157300	-	-
MWS4401	74.0713	57.045	73.064	C2H7N3	[M+H]+	1-Methylguanidine	Alkaloids	Alkaloids	471-29-4	3	64724.1	73153.3	66483.6	88274.1	72005.4	64689.1	C02294	-
Lchp000221	207.06	91.05	206.058	C11H10O4	[M+H]+	(Z)-3-Ethylidene-7-hydroxy-6-methoxyphthalide	Others	Others	-	3	2.59065e+06	2.4901e+06	2.26779e+06	1.80078e+06	2.37937e+06	2.44872e+06	-	-
pme1137	140.034	94.0287	139.027	C6H5NO3	[M+H]+	6-Hydroxynicotinic acid	Alkaloids	Pyridine alkaloids	5006-66-6	3	426055	476977	434572	463695	478861	615582	C01020	ko00760,ko01100
Zmbp002538	205.1	146.06	204.09	C11H12N2O2	[M+H]+	1-Methoxy-indole-3-acetamide	Alkaloids	Plumerane	-	1	4.24714e+06	3.29988e+06	3.80094e+06	3.95017e+06	3.25651e+06	2.8803e+06	-	-
pmf0291	96.0444	68.0495	95.0371	C5H5NO	[M+H]+	4-Hydroxypyridine	Alkaloids	Pyridine alkaloids	626-64-2	3	314766	249484	173445	180203	225686	249748	-	-
MWS4303	119.05	93.0335	120.058	C8H8O	[M-H]-	4-hydroxystyrene	Phenolic acids	Phenolic acids	2628-17-3	3	60781.5	54762.9	43286.6	47134.8	34177.6	44026.4	C05627	ko00940,ko01110
Cmsp002787	227.09	181.05	226.084	C11H14O5	[M+H]+	3,4'-Dihydroxy-3',5'-dimethoxypropiophenone	Phenolic acids	Phenolic acids	136196-47-9	1	3.11051e+06	2.75199e+06	2.96224e+06	2.008e+06	2.78732e+06	2.55169e+06	-	-
Wagn011658	653.38	397.14	654.383	C31H58O14	[M-H]-	1-Palmitoyl-Sn-Glycerol 3-O-Diglucoside	Lipids	Glycerol ester	-	1	50294.4	67093.6	95370.5	22114.4	19753.1	15877.7	-	-
Lmmn004625	449.11	287.06	450.116	C21H22O11	[M-H]-	Dihydrokaempferol-7-O-glucoside	Flavonoids	Flavanonols	-	3	1.29389e+06	1.67558e+06	1.75691e+06	1.28793e+06	1.13095e+06	922709	-	-
Lmhp002772	249.16	147.044	248.153	C14H20N2O2	[M+H]+	p-Coumaroylcadaverine	Alkaloids	Phenolamine	-	3	329942	275464	333906	382327	412282	296899	-	-
Zmcp102201	205.09	149.02	204.079	C12H12O3	[M+H]+	Senkyunolide B*	Others	Lactones	93236-67-0	1	5.40347e+06	8.53271e+06	7.62548e+06	1.03107e+07	7.41099e+06	8.68444e+06	C09921	-
pme2253	177.041	59.0139	178.048	C6H10O6	[M-H]-	L-Gulono-1,4-Lactone*	Others	Saccharides	1128-23-0	3	783589	834412	771142	676027	823027	945293	C01040	ko00053,ko01100,ko01240
Zmzp000987	158.12	98.1	158.118	C8H16NO2+	[M]+	Stachydrine methyl ester	Alkaloids	Pyrrole alkaloids	-	3	104088	166978	118835	171663	135185	126592	-	-
MWStz201	241.098	223.094	240.09	C14H12N2O2	[M+H]+	β-Carboline-1-propanoic acid	Alkaloids	Plumerane	89915-39-9	3	128395	93758.1	220013	178887	250398	226971	-	-
mws0178	353.09	191.06	354.095	C16H18O9	[M-H]-	Chlorogenic acid (3-O-Caffeoylquinic acid)*	Phenolic acids	Phenolic acids	327-97-9	1	6.26073e+06	6.39516e+06	6.06314e+06	6.19857e+06	4.91227e+06	4.53742e+06	C00852	ko00940,ko00941,ko00945,ko01110
pme0109	212.092	166.086	211.084	C10H13NO4	[M+H]+	Methyldopa	Amino acids and derivatives	Amino acids and derivatives	555-30-6	3	322175	313090	331337	304825	280627	218019	C07194	-
Lmyn007622	331.249	157.123	332.256	C18H36O5	[M-H]-	9,10,18-Trihydroxystearic acid	Lipids	Free fatty acids	496-86-6	3	6372.95	8973.74	6212.52	7385.18	8077.36	5770.09	C19621	ko00073
MWS4309	262.119	188.071	261.111	C13H15N3O3	[M+H]+	Glycyl-tryptophan	Amino acids and derivatives	Amino acids and derivatives	2390-74-1	3	400156	287623	350024	301383	326332	412575	-	-
pmb0880	482.324	341.305	481.317	C23H48NO7P	[M+H]+	LysoPE 18:0(2n isomer)	Lipids	LPE	-	3	86848.2	102147	92892.6	61923.9	83659.8	64692	-	-
Lacn003532	387.09	139.04	388.101	C16H20O11	[M-H]-	Malonyl Tachioside	Phenolic acids	Phenolic acids	-	2	115699	106440	107130	135128	95885.4	115914	-	-
Wahp004841	465.14	303.09	464.131	C22H24O11	[M+H]+	Homeriodictyol-7-O-β-O-glucoside	Flavonoids	Flavanones	-	3	1.37371e+06	1.80828e+06	2.02875e+06	1.19549e+06	1.37588e+06	1.67093e+06	-	-
Wccp000476	163.06	69.03	162.053	C6H10O5	[M+H]+	(2S)-2-[(1R)-1-carboxyethoxy]propanoic acid	Organic acids	Organic acids	-	1	846283	1.07297e+06	1.25889e+06	905258	835591	1.14694e+06	-	-
Lmrn002746	131.071	85.0654	132.079	C6H12O3	[M-H]-	2-Hydroxy-4-methylpentanoic acid	Organic acids	Organic acids	498-36-2	3	29384.2	26291.4	23823.8	22557.1	21638.8	16204.9	-	-
Zmgn000217	129.019	85.0298	130.027	C5H6O4	[M-H]-	Itaconic acid	Organic acids	Organic acids	97-65-4	3	80208.6	32064.8	53357.8	70888.2	54077.7	75965.8	C00490	ko00660,ko01100
Lmbp003825	325.09	163.04	324.084	C15H16O8	[M+H]+	Skimmin (7-Hydroxycoumarin-7-O-glucoside)	Lignans and Coumarins	Coumarins	93-39-0	3	1.27988e+06	1.53637e+06	1.18018e+06	1.70575e+06	2.37281e+06	2.29546e+06	-	-
mws0145	151.04	93.0346	152.047	C8H8O3	[M-H]-	O-Anisic acid (2-Methoxybenzoic acid)*	Phenolic acids	Phenolic acids	529-75-9	3	107982	118906	111526	104453	74561.5	85280.6	-	-
pmp001289	653.135	301.071	652.128	C28H28O18	[M+H]+	Chrysoeriol-7-O-(2''-O-glucuronyl)glucuronide	Flavonoids	Flavones	-	3	63350	121725	85038.6	68356.9	55015	78009.1	-	-
mws1589	503.162	179.055	504.169	C18H32O16	[M-H]-	D-Panose*	Others	Saccharides	33401-87-5	3	992481	673338	1.08974e+06	941871	1.20342e+06	875723	C00713	-
mws1189	193.035	72.9931	194.043	C6H10O7	[M-H]-	D-Galacturonic acid*	Others	Saccharides	685-73-4	1	459547	537989	428039	403636	520104	571900	C00333	ko00040,ko00053,ko00520,ko01100,ko01240,ko01250,ko02010
Hmcn006267	181.05	107.01	182.058	C9H10O4	[M-H]-	2,6-Dimethoxybenzoic acid*	Phenolic acids	Phenolic acids	1466-76-8	3	355955	316141	301703	382501	334458	268950	-	-
MWSmce455	181.051	107.015	182.058	C9H10O4	[M-H]-	Vanillic acid methyl ester*	Phenolic acids	Phenolic acids	3943-74-6	3	355955	316141	301703	382501	334458	268950	-	-
MW0128411	227.07	183.04	228.079	C14H12O3	[M-H]-	Resveratrol	Others	Stilbene	61434-67-1	3	318406	247403	250348	239772	253959	180480	-	-
Wbmn002185	365.06	167.03	366.074	C20H14O7	[M-H]-	6-Hydroxy-4-(4-hydroxy-3-methoxyphenyl)-7-methoxy-naphtho[2,3-c]furan-1,3-dione-1(ISO-1)	Lignans and Coumarins	Lignans	-	1	518764	363737	527679	441287	581661	431126	-	-
MWSHY0190	609.18	301.08	608.174	C28H32O15	[M+H]+	Diosmetin-7-O-rutinoside (Diosmin)*	Flavonoids	Flavones	520-27-4	1	2.15644e+07	1.88848e+07	2.46314e+07	7.99961e+06	1.12838e+07	1.05725e+07	C10039	-
mws1488	255.23	237.22	256.24	C16H32O2	[M-H]-	Palmitic acid	Lipids	Free fatty acids	57-10-3	3	105559	99941.8	116077	79003.1	104401	111625	C00249	ko00061,ko00062,ko00071,ko00073,ko01040,ko01100,ko01212
MWS1877	205.16	133.06	206.167	C14H22O	[M-H]-	4-tert-Octylphenol	Phenolic acids	Phenolic acids	140-66-9	2	63711.7	26321.3	44848.5	53239.2	37432.9	45198.8	C14205	-
Cmsn002480	523.218	475.196	524.226	C26H36O11	[M-H]-	Secoisolariciresinol-9'-O-glucoside	Lignans and Coumarins	Lignans	63320-67-2	3	47655.4	35878.6	51033.3	64090.1	46799.7	64927	-	-
pme0253	174.113	86.0964	173.105	C8H15NO3	[M+H]+	N-Acetyl-L-leucine	Amino acids and derivatives	Amino acids and derivatives	1188-21-2	3	1.23356e+06	751852	1.3056e+06	1696720	1253835	1285785	C02710	-
Zmxp002867	625.167	301.068	624.169	C28H32O16	[M+H]+	Chrysoeriol-5,7-di-O-glucoside	Flavonoids	Flavones	-	3	246885	147932	132806	146745	140618	191800	-	-
pmp001281	522.355	184.073	521.348	C26H52NO7P	[M+H]+	LysoPC 18:1	Lipids	LPC	-	3	161528	162364	153155	23236.9	16656.8	22702	-	-
pmn001378	519.19	357.14	520.194	C26H32O11	[M-H]-	Pinoresinol-4-O-glucoside	Lignans and Coumarins	Lignans	41607-20-9	1	439961	419253	397811	422068	520257	369214	C17529	-
pme0500	503.162	323.098	504.169	C18H32O16	[M-H]-	D-Melezitose	Others	Saccharides	597-12-6	3	654665	523275	540873	440696	600909	615766	C08243	-
MWSmce221	193.046	91.0528	192.042	C10H8O4	[M+H]+	5,7-Dihydroxy-4-methylcoumarin	Lignans and Coumarins	Coumarins	2107-76-8	3	1.61276e+06	1.1208e+06	1.30509e+06	1.03005e+06	1.45924e+06	1.36866e+06	-	-
MWSmce682	149.05	59.01	150.053	C5H10O5	[M-H]-	DL-Xylose*	Others	Saccharides	25990-60-7	1	404808	392989	377841	505702	365081	393965	-	-
Smcn001947	623.201	161.029	624.205	C29H36O15	[M-H]-	Acteoside; Verbascoside	Phenolic acids	Phenolic acids	61276-17-3	3	130119	181230	129097	112433	132350	92655.3	C10501	-
Wbtp004961	303.05	229.05	302.043	C15H10O7	[M+H]+	1,2,4,5-tetrahydroxy-7-(hydroxymethyl)anthracene-9,10-dione	Flavonoids	Other Flavonoids	-	1	9.22233e+06	6.22213e+06	5.63847e+06	7404370	6.7613e+06	5.18567e+06	-	-
MW0134030	303.05	229.05	302.043	C15H10O7	[M+H]+	5,7-dihydroxy-2-(2,3,4-trihydroxyphenyl)-4H-chromen-4-one	Others	Ketone compounds	-	3	9.22233e+06	6.22213e+06	5.63847e+06	7404370	6.7613e+06	5.18567e+06	-	-
Lbhp011917	503.14	179.03	502.132	C21H26O14	[M+H]+	Esculin glucoside	Lignans and Coumarins	Coumarins	-	1	968646	980865	1.22435e+06	731834	843091	1.03632e+06	-	-
mws5028	136.039	80.0556	135.032	C7H5NO2	[M+H]+	2-Benzoxazolinone	Alkaloids	Alkaloids	59-49-4	3	357784	309821	339809	322867	316892	230793	-	-
MWS00327g	106.05	60.0445	105.043	C3H7NO3	[M+H]+	L-Isoserine	Amino acids and derivatives	Amino acids and derivatives	632-13-3	3	2.7769e+06	2.84565e+06	2.74621e+06	3.47474e+06	3.20294e+06	2.43377e+06	-	-
Lazn002346	601.21	439.16	602.221	C27H38O15	[M-H]-	Erythro-Guaiacylglycerol-β-threo-syringylglycerol Ether glucoside	Lignans and Coumarins	Lignans	-	1	35755.7	33213.5	43026.6	33328.4	29921.6	23234.5	-	-
mws1090	259.02	96.97	260.03	C6H13O9P	[M-H]-	Glucose-1-phosphate*	Others	Saccharides	59-56-3	1	68415.1	92708.6	64720.3	101529	113459	142948	C00103	ko00010,ko00040,ko00052,ko00500,ko00520,ko00523,ko00561,ko01100,ko01110,ko01240,ko01250
pme2827	239.238	223.242	240.245	C16H32O	[M-H]-	Palmitaldehyde	Lipids	Free fatty acids	629-80-1	3	2.02224e+06	1.95513e+06	1.92459e+06	7.29102e+06	9.78311e+06	1.03971e+07	C00517	ko00071
pmp001270	494.32	184.07	493.317	C24H48NO7P	[M+H]+	LysoPC 16:1	Lipids	LPC	76790-27-7	2	531838	405377	542337	105333	139284	150961	-	-
pme3011	104.071	69.0348	103.063	C4H9NO2	[M+H]+	γ-Aminobutyric acid	Organic acids	Organic acids	56-12-2	3	1.30641e+07	1.12587e+07	1.09275e+07	1.49617e+07	1.52108e+07	1.08316e+07	C00334	ko00250,ko00330,ko00410,ko00650,ko00760,ko01100
pmp001111	579.17	561.16	578.164	C27H30O14	[M+H]+	Violanthin	Flavonoids	Flavones	40581-17-7	2	2.21898e+06	2.0769e+06	2.28532e+06	1899255	1669735	2.36977e+06	C10196	-
pmp000509	127.039	109.028	126.032	C6H6O3	[M+H]+	Maltol	Others	Ketone compounds	118-71-8	3	1.57048e+06	1.26224e+06	1.50957e+06	921286	1.28907e+06	1.28104e+06	C11918	ko00523,ko01110
MWS3031	204.113	159.093	203.106	C11H13N3O	[M+H]+	L-Tryptophanamide	Amino acids and derivatives	Amino acids and derivatives	20696-57-5	3	199345	92266.9	100760	68207.9	90315.3	65563.9	C00977	-
Wayn001257	292.14	130.09	293.147	C12H23NO7	[M-H]-	N-(1-Deoxy-1-fructosyl)Leucine	Nucleotides and derivatives	Nucleotides and derivatives	-	1	1.57147e+07	1.11082e+07	9.13697e+06	9.28704e+06	1.11582e+07	1.34137e+07	-	-
MWSmce582	144.065	84.0449	143.058	C6H9NO3	[M+H]+	Methyl L-pyroglutamate	Alkaloids	Pyrrole alkaloids	4931-66-2	3	168797	141117	177170	136810	140902	188046	-	-
pmb0706	713.16	465.1	712.149	C30H32O20	[M+H]+	Quercetin-3-O-(6''-O-malonyl)glucosyl-5-O-glucoside	Flavonoids	Flavonols	-	1	4.43963e+06	4.40846e+06	3.85191e+06	2.65799e+06	3.86054e+06	3.40627e+06	-	-
Wagp003695	324.11	177.05	323.101	C15H17NO7	[M+H]+	(E)-N-(Isoferuloyl)-Glutamic Acid	Alkaloids	Phenolamine	-	2	906210	949830	570629	777120	619685	543275	-	-
pmp001106	595.17	577.16	594.159	C27H30O15	[M+H]+	Vitexin-2''-O-glucoside	Flavonoids	Flavones	61360-94-9	2	4.04719e+06	4.38644e+06	4.12096e+06	3.75809e+06	3.2113e+06	4.6301e+06	C04024	ko00944
Cmsp003083	521.201	131.049	520.194	C26H32O11	[M+H]+	Dehydrodiconiferyl alcohol-4-O-glucoside	Lignans and Coumarins	Lignans	107870-88-2	3	125946	357120	105856	141896	102410	146056	-	-
Lmrn001951	181.05	135.04	182.058	C9H10O4	[M-H]-	(S)-2-Hydroxy-3-(4-Hydroxyphenyl)Propanoic Acid	Phenolic acids	Phenolic acids	23508-35-2	3	588346	381208	474774	410527	515745	359496	-	-
Hmlp006964	237.073	176.04	236.069	C12H12O5	[M+H]+	5,6,7-Trimethoxycoumarin	Lignans and Coumarins	Coumarins	55085-47-7	3	316334	301951	368298	245462	311024	358364	-	-
Zmjp003031	611.16	449.11	610.153	C27H30O16	[M+H]+	Orientin-2''-O-galactoside	Flavonoids	Flavones	-	1	3.85872e+06	3.72353e+06	2.32551e+06	1.95591e+06	2.73925e+06	2.78198e+06	-	-
Lmdn003756	193.051	135.046	194.058	C10H10O4	[M-H]-	Methyl caffeate	Phenolic acids	Phenolic acids	3843-74-1	3	104359	89384.4	74488.4	85703.3	58573.4	75279.6	C10477	-
MWSslk197	405.138	165.055	404.132	C17H24O11	[M+H]+	Secoxyloganin	Terpenoids	Monoterpenoids	58822-47-2	3	130065	113224	153913	132457	175671	125846	-	-
Lmtp006213	289.143	135.08	288.136	C17H20O4	[M+H]+	3'-Hydroxy-3,4,5-trimethoxybibenzyl	Others	Stilbene	-	3	50847.1	67718.1	83034.3	42291.1	54802.7	61905.9	-	-
pme0170	217.13	158.081	216.122	C8H16N4O3	[M+H]+	N-Acetyl-L-Arginine	Amino acids and derivatives	Amino acids and derivatives	155-84-0	3	2.47074e+06	5.78508e+06	3.84834e+06	6.73108e+06	7.94666e+06	5.42338e+06	-	-
Lmtp002822	535.14	499.12	534.137	C25H26O13	[M+H]+	Apigenin-6-C-arabinoside-8-C-xyloside*	Flavonoids	Flavones	-	1	1.4813e+07	1.09323e+07	1.33669e+07	6.60178e+06	9.51324e+06	7.4513e+06	-	-
mws1668	187.04	131.05	186.032	C11H6O3	[M+H]+	Angelicin	Lignans and Coumarins	Coumarins	523-50-2	1	1.787e+07	1.7565e+07	1.61803e+07	1.73541e+07	1.27267e+07	1.25353e+07	C09060	ko00999,ko01110
MWSslk155	197.046	137.025	198.053	C9H10O5	[M-H]-	4-Hydroxy-3-methoxymandelate	Phenolic acids	Phenolic acids	55-10-7	3	445975	464442	419598	367353	248661	329021	C05584	ko00350,ko01100
mws1014	209.044	149.022	208.037	C10H8O5	[M+H]+	Fraxetin (7,8-Dihydroxy-6-methoxycoumarin)	Lignans and Coumarins	Coumarins	574-84-5	3	19547415	16426925	19928695	12044080	17407345	17011790	C09265	ko00999,ko01110
MWS00216g	152.107	91.0564	151.1	C9H13NO	[M+H]+	L-Phenylalaninol	Amino acids and derivatives	Amino acids and derivatives	3182-95-4	3	60227.6	39474.7	73614.3	83796.9	115190	83546.4	-	-
Lmsn004674	309.098	147.045	310.105	C15H18O7	[M-H]-	1-O-Cinnamoyl-β-D-glucose	Phenolic acids	Phenolic acids	40004-96-4	3	98563.5	71136.1	72517.2	52943.5	77958.5	72061.2	-	-
MWS3035	160.061	116.052	161.069	C6H11NO4	[M-H]-	N-Methyl-L-Glutamate	Amino acids and derivatives	Amino acids and derivatives	35989-16-3	3	63967.9	21477.5	49265.2	41874.1	57096.4	61654.7	C01046	ko01100
Qmdp090606	370.2	132.1	370.201	C22H28NO4+	[M]+	(-)-N-Methyltetrahydropalmatine	Alkaloids	Alkaloids	-	1	177450	166663	83446.2	125853	151982	102848	-	-
MWS201399	264.102	104.053	263.094	C9H17N3O4S	[M+H]+	Met-Asn	Amino acids and derivatives	Amino acids and derivatives	36261-61-7	3	42605	24005.3	49181.4	33596.3	27640.6	40803.7	-	-
Wcfn008271	239.03	223.02	240.042	C14H8O4	[M-H]-	Danthron; 1,8-Dihydroxyanthraquinone	Quinones	Anthraquinone	117-10-2	3	1.48029e+06	1.32687e+06	1.43819e+06	5.25425e+06	7.14995e+06	7.75449e+06	C10312	-
MWSmce315	167.993	135.013	166.986	C7H5NS2	[M+H]+	2-Mercaptobenzothiazole	Alkaloids	Alkaloids	149-30-4	3	27313.4	16083.3	15785.3	26616.3	28411.8	19306.5	C14437	-
Zmsp001834	169.05	65	168.042	C8H8O4	[M+H]+	2,6-Dimethoxy-1,4-benzoquinone*	Quinones	Quinones	530-55-2	1	1.64196e+06	1.58873e+06	1.22717e+06	1.29111e+06	1.60512e+06	1.91804e+06	C10331	-
MWS201436	248.16	84.0813	247.153	C10H21N3O4	[M+H]+	Lys-Thr	Amino acids and derivatives	Amino acids and derivatives	97791-84-9	3	811047	632318	745505	522476	522749	722480	-	-
Wmqn000814	367.06	205.04	368.074	C16H16O10	[M-H]-	6,7-Dihydroxycoumarin-7-O-(6'-acetyl)glucoside	Lignans and Coumarins	Coumarins	-	3	402986	355363	262799	310584	361568	242456	-	-
mws0596	154.05	136.039	153.043	C7H7NO3	[M+H]+	3-Hydroxyanthranilic acid	Alkaloids	Phenolamine	548-93-6	3	732571	566076	477517	756989	507379	672191	C00632	ko00380,ko01100,ko01240
MWS1039a	104.07	57.0342	103.063	C4H9NO2	[M+H]+	(S)-3-Amino-2-methylpropanoic acid	Amino acids and derivatives	Amino acids and derivatives	4249-19-8	3	50122.8	38130.5	45819.7	45048.6	52551.6	35195.1	C03284	ko00280,ko01100
Lmap001821	285.1	123.04	284.09	C13H16O7	[M+H]+	Helicide	Phenolic acids	Phenolic acids	80154-34-3	2	273773	251543	215926	178999	267500	233551	-	-
MW0109857	390.21	163.04	389.202	C14H27N7O6	[M+H]+	Thr-Asn-Arg	Amino acids and derivatives	Amino acids and derivatives	-	3	55980.1	46383.4	56936	49596.3	74244.3	64147.2	-	-
pmb0587	639.156	477	638.148	C28H30O17	[M+H]+	Chrysoeriol-7-O-(2''-O-glucuronyl)glucoside	Flavonoids	Flavones	-	3	649911	658343	598687	436203	600579	647762	-	-
MWSmce151	337.1	281.04	336.1	C20H16O5	[M+H]+	Psoralidin	Lignans and Coumarins	Coumarins	18642-23-4	3	62109.8	45801.9	77881.2	20084.3	24609	29921.8	C10523	-
pmp000573	447.13	285.08	446.121	C22H22O10	[M+H]+	Acacetin-7-O-galactoside*	Flavonoids	Flavones	-	1	1.88274e+06	1.6898e+06	1.65721e+06	1.03877e+06	1.01197e+06	1.42282e+06	-	-
Lmgn002250	677.17	191.06	678.18	C31H34O17	[M-H]-	Dicaffeoylquinic acid-O-glucoside	Phenolic acids	Phenolic acids	-	2	66706.8	98166.2	31971.2	98114.3	76184.5	66925.9	-	-
MWSslk171	407.13	227.07	408.142	C20H24O9	[M-H]-	Nodakenin	Lignans and Coumarins	Coumarins	495-31-8	1	5741840	4615285	11334130	9263665	8065570	11883005	C09279	-
pmp000413	433.11	283.06	432.106	C21H20O10	[M+H]+	Genistein-8-C-glucoside	Flavonoids	Isoflavones	66026-80-0	1	2237445	1499525	2274695	978355	1231975	829080	C10420	-
pme2529	163.061	101.024	164.069	C6H12O5	[M-H]-	1,5-Anhydro-D-glucitol	Others	Saccharides	154-58-5	3	33635.6	55044.8	43887.9	48329.4	54149.7	70750.1	C07326	-
mws0236	124.007	79.9574	125.015	C2H7NO3S	[M-H]-	2-Aminoethanesulfonic acid	Organic acids	Organic acids	107-35-7	3	145598	118318	140261	177294	175940	121411	C00245	ko00430,ko00920,ko01100,ko02010
mws0025	125.024	79.0189	126.032	C6H6O3	[M-H]-	Pyrogallol	Phenolic acids	Phenolic acids	87-66-1	3	109409	84013.4	98909.5	51835.5	66330.3	78262.4	C01108	-
MWSmce580	137.025	108.022	138.032	C7H6O3	[M-H]-	2,5-Dihydroxybenzaldehyde	Phenolic acids	Phenolic acids	1194-98-5	3	108119	90311.6	84050.5	68925.9	83201.6	103429	C05585	ko00350,ko01100
MWS201405	319.141	110.072	318.133	C15H18N4O4	[M+H]+	His-Tyr	Amino acids and derivatives	Amino acids and derivatives	35979-00-1	3	88685.8	95080	89989.3	75043.1	100827	113749	-	-
pme1987	88.0404	71.0124	89.0477	C3H7NO2	[M-H]-	L-Alanine	Amino acids and derivatives	Amino acids and derivatives	56-41-7	3	10525.3	12278.2	9602.82	16852.4	16354	11356.4	C00041	ko00250,ko00270,ko00430,ko00450,ko00470,ko00710,ko00970,ko01100,ko01110,ko01200,ko01230,ko02010,ko04122
pme2292	89.1073	72.0808	88.1	C4H12N2	[M+H]+	Putrescine	Alkaloids	Alkaloids	110-60-1	3	173887	170465	207582	208972	142602	209458	C00134	ko00330,ko00470,ko00480,ko00960,ko01100,ko01110,ko02010
MWSmce663	153.055	120.022	154.063	C8H10O3	[M-H]-	Vanillyl alcohol	Phenolic acids	Phenolic acids	498-00-0	3	9525.87	5613.82	8574.28	6437.65	9534.51	7290.94	-	-
mws0943	151.051	71.0128	152.059	C7H8N2O2	[M-H]-	1,4-Dihydro-1-Methyl-4-oxo-3-pyridinecarboxamide	Alkaloids	Pyridine alkaloids	769-49-3	3	53336.1	53002.7	59659.8	52831.8	59872.1	78274.4	C05843	ko00760,ko01100
pmp000415	447.13	285.08	446.121	C22H22O10	[M+H]+	3'-Methoxydaidzin	Flavonoids	Isoflavones	200127-80-6	2	1.65589e+06	1.56896e+06	1.22819e+06	1.07997e+06	1.18973e+06	782933	-	-
MWSHC20176	455.352	455.354	456.36	C30H48O3	[M-H]-	3-Hydroxylup-20(29)-en-28-oic acid (Betulinic acid)	Terpenoids	Triterpene	472-15-1	3	15510.4	24191.8	26070.1	12010.5	10617.8	7875.57	C08619	-
mws4053	455.353	455.353	456.36	C30H48O3	[M-H]-	3-Hydroxyurs-12-en-28-oic acid (Ursolic acid)	Terpenoids	Triterpene	77-52-1	3	15510.4	24191.8	26070.1	12010.5	10617.8	7875.57	C08988	-
pme2117	426.022	158.925	427.029	C10H15N5O10P2	[M-H]-	Adenosine 5'-diphosphate	Nucleotides and derivatives	Nucleotides and derivatives	58-64-0	3	64566.6	46888.2	77390	53418.7	39256.3	36852.6	C00008	ko00190,ko00195,ko00230,ko00908,ko01100,ko01110,ko01232,ko01240
MWS20148	433.113	271.074	432.106	C21H20O10	[M+H]+	Apigenin-4'-O-glucoside*	Flavonoids	Flavones	-	3	311858	412857	877700	245441	259359	172226	-	-
pmb0636	581.15	431.3	580.143	C26H28O15	[M+H]+	Orientin-7-O-arabinoside	Flavonoids	Flavones	-	2	1.68916e+07	1.47274e+07	1.19194e+07	1.05958e+07	1.41531e+07	1.62423e+07	-	-
pmb0876	454.29	313.27	453.286	C21H44NO7P	[M+H]+	LysoPE 16:0	Lipids	LPE	53862-35-4	1	644037	533131	516703	58391.4	89598.9	77094.8	-	-
MWS1852	137.06	94.0418	136.052	C8H8O2	[M+H]+	4-Methoxybenzaldehyde	Phenolic acids	Phenolic acids	123-11-5	3	684967	379734	462280	341907	502095	372297	C10761	-
pme2773	223.075	134.027	222.067	C7H14N2O4S	[M+H]+	L-Cystathionine	Amino acids and derivatives	Amino acids and derivatives	56-88-2	3	48205.1	6083.04	23340	10953.6	13340	16675	C02291	ko00260,ko00270,ko01100,ko01110,ko01230,ko01240
Jmwn002494	325.09	119.05	326.1	C15H18O8	[M-H]-	(2E)-3-[4-(β-D-glucopyranoside)-phenylacrylic]-acid	Phenolic acids	Phenolic acids	-	1	531543	702429	663551	526723	805959	736904	-	-
MWS201429	237.09	104.053	236.083	C8H16N2O4S	[M+H]+	Met-Ser	Amino acids and derivatives	Amino acids and derivatives	14517-43-2	3	10949.5	36675	14527.3	8340	11670	12771.6	-	-
Lafp002722	389.15	155.07	388.136	C17H24O10	[M+H]+	3-Hydroxy-1-(4-hydroxy-3,5-dimethoxy-phenyl)-propan-1-one glucoside	Phenolic acids	Phenolic acids	-	1	97151.2	46517.6	75093.5	34490.9	33254.4	47948.1	-	-
mws0884	328.045	134.047	329.053	C10H12N5O6P	[M-H]-	Cyclic 3',5'-Adenylic acid	Nucleotides and derivatives	Nucleotides and derivatives	60-92-4	1	43176.3	46036.6	57919.3	31122.7	32067.5	44739.6	C00575	ko00230,ko01100
Wbmn009702	487.34	487.34	488.35	C30H48O5	[M-H]-	2,3,23-Trihydroxyurs-12-en-28-oic acid	Terpenoids	Triterpene	-	3	199125	183885	212070	95417.6	133519	146205	-	-
Lmjn007168	329.067	271.026	330.074	C17H14O7	[M-H]-	Quercetin-3,3'-dimethyl ether	Flavonoids	Flavonols	4382-17-6	3	37355.6	36486.6	71849.1	23881.7	36485.7	33989.7	-	-
Lmxp011770	279.159	149.023	278.152	C16H22O4	[M+H]+	Diisobutyl phthalate*	Phenolic acids	Phenolic acids	84-69-5	3	8.40438e+06	3.09284e+06	5.47837e+06	1.06597e+07	6.92939e+06	9.80844e+06	C15205	-
pmb2228	538.387	184.073	537.379	C27H56NO7P	[M+H]+	LysoPC 19:0	Lipids	LPC	108273-88-7	3	70932.4	59990	56580.3	28202.9	42191.5	31635.5	-	-
Wagp005508	457.2	209.15	456.2	C22H32O10	[M+H]+	3-Hydroxy-Beta-Ionone 3-(6''-Malonyl)Glucoside	Others	Others	-	2	3.63934e+06	3.24531e+06	3.59765e+06	2.14296e+06	2.84394e+06	3.32585e+06	-	-
MWSmce704	127.02	65.0384	126.014	C6H6OS	[M+H]+	5-Methyl-2-thiophenecarboxaldehyde	Others	Aldehyde compounds	13679-70-4	3	50164.1	62525	56848.4	62519.9	65329.7	91117.9	-	-
Zmcp102203	279.16	149.024	278.152	C16H22O4	[M+H]+	Senkyunolide M	Others	Lactones	146986-60-9	3	8.06802e+06	9.82876e+06	4.61008e+06	9.8825e+06	6.35736e+06	8.23302e+06	-	-
Zmcp102204	279.16	149.024	278.152	C16H22O4	[M+H]+	Senkyunolide Q	Others	Lactones	-	3	8.06802e+06	9.82876e+06	4.61008e+06	9.8825e+06	6.35736e+06	8.23302e+06	-	-
Smhp004476	565.15	433.11	564.148	C26H28O14	[M+H]+	Isovitexin-2''-O-xyloside*	Flavonoids	Flavones	-	3	4.26401e+06	3.91766e+06	4.42004e+06	2.73356e+06	4.25272e+06	3.78203e+06	-	-
Zmjp003291	595.17	433.12	594.159	C27H30O15	[M+H]+	Vitexin-2''-O-galactoside	Flavonoids	Flavones	-	1	1.08319e+06	953182	990925	817637	570217	569430	-	-
mws1660	565.16	529.13	564.148	C26H28O14	[M+H]+	Schaftoside	Flavonoids	Flavones	51938-32-0	1	3.41349e+06	4.18841e+06	4.49296e+06	3.15643e+06	3.86909e+06	2.47868e+06	C10181	-
Lmhp009129	482.324	184.073	481.317	C23H48NO7P	[M+H]+	LysoPC 15:0(2n isomer)	Lipids	LPC	-	3	145563	101601	136718	18449	28167.7	21380	-	-
Lmmn002179	313.093	107.05	314.1	C14H18O8	[M-H]-	Methylsalicylate-2-O-glucoside	Phenolic acids	Phenolic acids	10019-60-0	3	96959.2	88223.6	118229	99559.8	113542	72145.7	-	-
Hmsp000364	144.098	98.09	143.095	C7H13NO2	[M+H]+	L-Cyclopentylglycine	Amino acids and derivatives	Amino acids and derivatives	2521-84-8	3	3.18163e+06	3.36748e+06	3.42146e+06	3.13727e+06	3.12955e+06	2066560	-	-
pmb0709	713.16	465.2	712.149	C30H32O20	[M+H]+	Quercetin-7-O-(6''-malonyl)glucosyl-5-O-glucoside	Flavonoids	Flavonols	-	2	1378310	1489420	641445	367145	232537	318522	-	-
Lmqn000432	333.06	333.06	334.067	C9H19O11P	[M-H]-	1-(sn-Glycero-3-phospho)-1D-myo-inositol	Others	Saccharides	-	1	251164	133400	290793	201841	312910	299241	-	-
MWSHY0013	255.065	181.064	254.058	C15H10O4	[M+H]+	3,4'-Dihydroxyflavone	Flavonoids	Flavones	14919-49-4	3	88259.4	76989.5	85655	72109.6	59177.6	92356.3	-	-
MWS3270	166.019	79.9572	167.022	C7H5NO4	[M-H]-	Quinolinic Acid	Alkaloids	Pyridine alkaloids	89-00-9	3	1.00279e+06	1.42208e+06	1.01603e+06	932772	1.45248e+06	1.3853e+06	C03722	ko00380,ko00410,ko00760,ko01100,ko01240
Lmmp002080	193.13	105.03	192.126	C11H16N2O	[M+H]+	N-(4-Aminobutyl)benzamide	Alkaloids	Alkaloids	5692-23-9	3	461907	564506	405681	277072	402774	435650	-	-
Lmsp004137	289.071	163.039	288.063	C15H12O6	[M+H]+	3,4,2',4',6'-Pentahydroxychalcone	Flavonoids	Chalcones	73692-51-0	3	1993865	2317035	2058105	1509630	975000	1147945	C15525	ko00941,ko01100,ko01110
MWStz261	211.145	70.0652	210.137	C11H18N2O2	[M+H]+	Cyclo(D-Leu-L-Pro)*	Amino acids and derivatives	Amino acids and derivatives	36238-67-2	3	403975	449945	422752	877700	567800	855900	-	-
Lasp003143	193.09	105.07	192.078	C11H12O3	[M+H]+	1,4-Benzodioxin-6-propanol	Others	Alcohol compounds	-	3	862172	988935	851830	966421	988856	639779	-	-
pmf0290	94.0298	66.0338	95.0371	C5H5NO	[M-H]-	2-Hydroxypyridine	Alkaloids	Pyridine alkaloids	142-08-5	3	24388.4	44486.8	83564.5	38426.7	25736.3	27398	C02502	-
MWSmce657	71.06	54.0351	70.0531	C3H6N2	[M+H]+	3-Aminopropionitrile	Alkaloids	Alkaloids	151-18-8	3	23467.8	31825.5	22152.9	14777.2	9378.24	13733	-	-
Zmhp005139	565.12	317.07	564.111	C25H24O15	[M+H]+	Tamarixetin-3-O-(6''-malonyl)glucoside	Flavonoids	Flavonols	-	1	1.09801e+07	8.76694e+06	6.54307e+06	2.87282e+06	4.5964e+06	3.95384e+06	-	-
mws1051	399.144	250.094	399.144	C15H23N6O5S+	[M]+	S-Adenosylmethionine	Amino acids and derivatives	Amino acids and derivatives	485-80-3	3	237185	222762	256924	183045	196569	275651	-	-
mws0566	123.045	108.022	124.052	C7H8O2	[M-H]-	4-Methylcatechol	Phenolic acids	Phenolic acids	452-86-8	3	42892	40773.9	34162.5	30187.8	30254.1	19628.7	C06730	ko01100
MWS20966	206.096	116.071	205.089	C7H15N3O2S	[M+H]+	S-methyl-L-thiocitrulline	Amino acids and derivatives	Amino acids and derivatives	209589-59-3	3	216441	152048	254484	157401	232984	162091	-	-
Hmqp006235	516.304	184.073	515.301	C26H46NO7P	[M+H]+	LysoPC 18:4	Lipids	LPC	-	3	87514.3	75442.1	67130.4	31344.6	23340	37557.4	-	-
Lmsp102912	479.18	185.08	478.169	C20H30O13	[M+H]+	2,4,6-Trimethoxyphenyl 1-O-β-D-apiofuranosyl-(1→6)-β-D-glucopyranoside	Others	Others	-	3	118613	120039	88649.5	97968.8	73484.9	118338	-	-
MWSmce340	203.118	132.085	202.111	C12H14N2O	[M+H]+	L-Praziquanamine	Alkaloids	Isoquinoline alkaloids	99746-73-3	3	128564	79972.7	127508	104923	67057.2	103313	-	-
pmb0565	509.129	347.076	508.122	C23H24O13	[M+H]+	Syringetin-3-O-glucoside*	Flavonoids	Flavonols	40039-49-4	3	686655	469110	439015	515940	835785	726855	-	-
mws0582	322.107	130.05	321.099	C11H19N3O6S	[M+H]+	S-(Methyl)glutathione	Amino acids and derivatives	Amino acids and derivatives	2922-56-7	3	94346.6	101587	93721.9	103977	69978.9	71451.3	C11347	-
Zbzp007301	293.21	55.05	292.204	C18H28O3	[M+H]+	2-Methoxy-6-undecyl-1,4-benzoquinone	Quinones	Quinones	-	1	1.22308e+06	792594	743498	842965	585562	560181	-	-
MWSmce674	451.362	89.0588	450.35	C31H46O2	[M+H]+	Phylloquinone (Vitamin K1)	Others	Vitamin	84-80-0	3	25341.7	12562.1	15471.7	15419	20606.7	13038.6	-	-
mws0124	247.108	130.063	246.1	C13H14N2O3	[M+H]+	N-(3-Indolylacetyl)-L-alanine	Amino acids and derivatives	Amino acids and derivatives	57105-39-2	3	136473	233530	129104	128345	126240	187917	-	-
Lmmn009932	469.369	469.369	470.376	C31H50O3	[M-H]-	3-Hydroxy-24-methylene-9,19-cyclolanostan-26-oic acid (Ambolic acid)	Terpenoids	Triterpene	13878-93-8	3	54590.2	18954	24472.6	23376.1	14502.7	21719.7	-	-
MWS201434	269.16	156.08	268.154	C12H20N4O3	[M+H]+	Ile-His	Amino acids and derivatives	Amino acids and derivatives	97284-12-3	3	183593	216881	220758	259546	159853	207269	-	-
Hmbp003234	255.086	163.03	254.079	C12H14O6	[M+H]+	1-O-Caffeoylglycerol	Phenolic acids	Phenolic acids	-	3	156103	137372	122752	94313.9	153191	122175	-	-
pma6455	229.012	96.9696	230.019	C5H11O8P	[M-H]-	Ribulose-5-phosphate	Others	Saccharides	4151-19-3	3	27946.7	115164	106234	51597.4	73744.9	84340	C00199	ko00030,ko00040,ko00710,ko00740,ko01100,ko01110,ko01200,ko01230,ko01240,ko01250
Wayn000370	264.11	102.06	265.116	C10H19NO7	[M-H]-	N-(1-Deoxy-1-fructosyl)Piperidic acid	Alkaloids	Alkaloids	-	1	1.1793e+06	2.18119e+06	1.26816e+06	1.71135e+06	1.30989e+06	2.13091e+06	-	-
mws0906	341.124	179.071	342.132	C16H22O8	[M-H]-	Coniferin	Phenolic acids	Phenolic acids	531-29-3	3	1.12023e+07	9.96886e+06	1.21754e+07	1.31147e+07	8.5038e+06	9.29508e+06	C00761	ko00940,ko01110
Hmgp002036	479.12	317.06	478.111	C22H22O12	[M+H]+	Nepetin-7-O-glucoside(Nepitrin)	Flavonoids	Flavones	569-90-4	1	1.95744e+06	1.17457e+06	1759923	757681	1.17889e+06	845620	-	-
MWS5185	151.04	109.029	152.047	C8H8O3	[M-H]-	2',4'-Dihydroxyacetophenone	Phenolic acids	Phenolic acids	89-84-9	3	25023.7	33162.4	27896.9	27979.7	21928.7	35557.2	C03663	-
MWSHY0163	289.071	215.071	288.063	C15H12O6	[M+H]+	Aromadendrin (Dihydrokaempferol)	Flavonoids	Flavanonols	480-20-6	3	81992.7	125844	76587.2	83943.9	51364.3	75149.8	C00974	ko00941,ko01100,ko01110
Lmmp003817	535.11	287.05	534.101	C24H22O14	[M+H]+	Kaempferol-3-O-(6''-malonyl)glucoside*	Flavonoids	Flavonols	-	1	2.10844e+06	1.50187e+06	2.12045e+06	782106	1.21086e+06	859442	-	-
MWSmce061	237.072	176.045	236.069	C12H12O5	[M+H]+	Dimethylfraxetin; 6,7,8-Trimethoxycoumarin	Lignans and Coumarins	Coumarins	6035-49-0	3	207900	206767	219660	160722	235734	262811	-	-
Lmbn006152	279.233	59.0133	280.24	C18H32O2	[M-H]-	(9Z,11E)-Octadecadienoic acid*	Lipids	Free fatty acids	2540-56-9	2	11035	14685.5	16013.4	6910.24	4471.39	7182.56	C04056	ko00591
mws1491	279.23	59.01	280.24	C18H32O2	[M-H]-	Linoleic acid*	Lipids	Free fatty acids	60-33-3	2	11035	14685.5	16013.4	6910.24	4471.39	7182.56	C01595	ko00591,ko01040,ko01100
pmp001214	310.165	251.087	310.165	C16H24NO5+	[M]+	Sinapine	Alkaloids	Phenolamine	18696-26-9	3	85929.7	80595.3	98370	113529	69706.5	104937	C00933	ko00940,ko01110
MWS201394	283.13	136.08	282.122	C13H18N2O5	[M+H]+	Thr-Tyr	Amino acids and derivatives	Amino acids and derivatives	145295-02-9	3	55097.3	19594.2	85570.3	114794	69737.7	93730.2	-	-
Lmyp005841	417.118	255.059	416.111	C21H20O9	[M+H]+	Chrysin-7-O-glucoside	Flavonoids	Flavones	31025-53-3	3	90623	101831	80515.5	39498.5	64333.2	49693.2	-	-
pmn001681	165.092	149.061	166.099	C10H14O2	[M-H]-	1-(4-Methoxyphenyl)-1-propanol	Phenolic acids	Phenolic acids	5349-60-0	3	26287.9	19948	25276.6	56820.9	92307.2	70363.8	-	-
pmb2970	625.18	565.3	626.185	C28H34O16	[M-H]-	Hesperetin-5,7-di-O-glucoside	Flavonoids	Flavanones	-	3	81614.3	108473	97240.9	107825	73863.6	122379	-	-
pmp001311	627.16	303.1	626.148	C27H30O17	[M+H]+	6-Hydroxykaempferol-7,6-O-Diglucoside	Flavonoids	Flavonols	-	1	8.21e+06	1.14741e+07	6.36659e+06	3.55797e+06	5.9123e+06	4.83671e+06	-	-
mws1078	138.055	92.0495	137.048	C7H7NO2	[M+H]+	Anthranilic Acid	Phenolic acids	Phenolic acids	118-92-3	3	218233	172437	224316	121214	171775	201929	C00108	ko00380,ko00400,ko00996,ko01100,ko01110,ko01230
pmb1562	351.25	147.12	350.246	C21H34O4	[M+H]+	1-Stearidonoyl-Glycerol	Lipids	Glycerol ester	-	1	8.2715e+06	5.74053e+06	8.83158e+06	4.42969e+06	2.90263e+06	3.00776e+06	-	-
pmd0136	524.37	184.07	523.364	C26H54NO7P	[M+H]+	LysoPC 18:0(2n isomer)	Lipids	LPC	-	3	365093	334775	383216	11343.8	17988.7	12844.6	-	-
Rfmb25702	561.2	357.13	562.205	C28H34O12	[M-H]-	Pinoresinol-4-O-(6''-acetyl)glucoside	Lignans and Coumarins	Lignans	-	1	382997	301226	220886	224571	140338	162365	-	-
MWS201403	218.15	84.0816	217.143	C9H19N3O3	[M+H]+	Lys-Ala	Amino acids and derivatives	Amino acids and derivatives	17043-71-9	3	304404	332765	380167	268517	230702	160676	-	-
Hmtn001120	315.11	153.06	316.116	C14H20O8	[M-H]-	5-(2-Hydroxyethyl)-2-O-glucosylphenol	Phenolic acids	Phenolic acids	-	1	2.34436e+07	1.44687e+07	1.64552e+07	1.42262e+07	2.27657e+07	2.29198e+07	-	-
Zmpp002571	303.05	257.05	302.043	C15H10O7	[M+H]+	Robinetin	Flavonoids	Flavonols	490-31-3	1	2.56001e+06	2.13828e+06	5745310	1.63522e+06	2.44077e+06	2.73247e+06	C10177	-
MWS201464	294.182	84.0811	293.174	C15H23N3O3	[M+H]+	Lys-Phe	Amino acids and derivatives	Amino acids and derivatives	6235-35-4	3	118583	135712	137771	140397	126487	200799	-	-
Lmrj002793	277.119	120.08	276.111	C14H16N2O4	[M+H]+	Cyclo(Phe-Glu)	Amino acids and derivatives	Amino acids and derivatives	-	3	58068.9	20005	47947.7	58276.8	56124.9	35111.5	-	-
MW0109039	555.24	493.24	554.244	C22H42N4O8S2	[M+H]+	Pantethine	Alkaloids	Alkaloids	16816-67-4	3	1.7205e+07	2.10504e+07	1.59217e+07	2.17468e+07	1.512e+07	2.57362e+07	-	-
MWSslk135	193.051	147.045	192.042	C10H8O4	[M+H]+	7,8-Dihydroxy-4-methylcoumarin	Lignans and Coumarins	Coumarins	2107-77-9	3	587914	1.02986e+06	578569	933562	575162	946623	-	-
pmd0087	122.096	107.073	121.089	C8H11N	[M+H]+	N,N-Dimethylaniline	Alkaloids	Alkaloids	121-69-7	3	53929.7	79824.9	91611.5	40985.4	69535.9	54673.6	C02846	-
Wagp002398	513.21	205.1	512.201	C23H32N2O11	[M+H]+	Tryptophan N-Rutinoside	Alkaloids	Plumerane	-	1	189606	221252	138277	136205	137104	208896	-	-
MWS1919	86.0059	58.9947	84.9986	C3H3NS	[M+H]+	Thiazole	Alkaloids	Alkaloids	288-47-1	3	7706.16	28340	28340	7386.36	8598.12	4993.99	C02740	-
mws0373	129.056	83.0509	130.063	C6H10O3	[M-H]-	4-Methyl-2-oxovalerate	Organic acids	Organic acids	816-66-0	3	19747	22166	13340	23399.2	25897.4	15106.2	C00233	ko00280,ko00290,ko00966,ko01100,ko01110,ko01210,ko01230
MWSHY0067	611.16	303.05	610.153	C27H30O16	[M+H]+	Quercetin-3-O-rutinoside (Rutin)*	Flavonoids	Flavonols	153-18-4	1	5580615	8506855	24546800	3.30111e+06	4.37736e+06	2.57743e+06	C05625	ko00944,ko01100,ko01110
Lmmp003091	611.16	303.05	610.153	C27H30O16	[M+H]+	Quercetin-3-O-(4''-O-glucosyl)rhamnoside*	Flavonoids	Flavonols	59262-54-3	1	5580615	8506855	24546800	3.30111e+06	4.37736e+06	2.57743e+06	C17563	-
pme2890	269.062	136.043	268.055	C8H16N2O4S2	[M+H]+	L-Homocystine	Amino acids and derivatives	Amino acids and derivatives	626-72-2	3	64050.9	62673.5	43390	48612.5	36217.6	62182.3	C01817	ko00270
pmb2654	460.146	117.9	461.153	C19H27NO12	[M-H]-	Anthranilate-1-O-Sophoroside	Phenolic acids	Phenolic acids	-	3	279401	142551	250037	267543	204148	349591	-	-
MWSmce039	124.04	80.05	123.032	C6H5NO2	[M+H]+	Isonicotinic acid	Others	Vitamin	55-22-1	2	9.22327e+06	7.19249e+06	8.89666e+06	9.037e+06	7.34576e+06	1.23655e+07	C07446	-
mws0875	179.048	76.0215	178.041	C5H10N2O3S	[M+H]+	L-Cysteinyl-L-glycine	Amino acids and derivatives	Amino acids and derivatives	19246-18-5	3	37289.3	44311.6	20005	25082.3	19560.9	33340	C01419	ko00480,ko01100
Lbhp011919	427.08	179.03	426.08	C18H18O12	[M+H]+	Esculin 6'-Malonate	Lignans and Coumarins	Coumarins	-	1	1.78233e+07	1.36745e+07	2.06789e+07	1.22451e+07	2.12825e+07	1.73332e+07	-	-
MW0159255	233.11	114.95	232.106	C9H16N2O5	[M+H]+	Val-Asp	Amino acids and derivatives	Amino acids and derivatives	20556-16-5	3	1.33212e+06	1.43465e+06	1.02293e+06	1.51478e+06	1.18462e+06	876404	-	-
mws0044	303.051	125.024	304.058	C15H12O7	[M-H]-	Taxifolin(Dihydroquercetin)	Flavonoids	Flavanonols	480-18-2	3	49735.2	67942.7	53310.4	32717.4	50008.1	31814.4	C01617	ko00941,ko01100,ko01110
Zmcp102202	205.086	149.023	204.079	C12H12O3	[M+H]+	Senkyunolide C*	Others	Lactones	-	1	5.92831e+06	2.95489e+06	5.52887e+06	6.71919e+06	4.74002e+06	8.27456e+06	-	-
Wcgp003250	163.08	103.05	162.068	C10H10O2	[M+H]+	2-Methyl-3-hydroxyindan-1-one	Others	Others	-	3	1885740	2344140	1919520	1.98036e+06	1.54411e+06	2.6471e+06	-	-
Lmfn004065	433.078	300.029	434.085	C20H18O11	[M-H]-	Morin-3-O-arabinoside	Flavonoids	Flavonols	-	3	17865.4	13997.3	18335.6	7042.82	8662.33	4930.61	-	-
MWSHY0180	447.13	285.08	446.121	C22H22O10	[M+H]+	Glycitin	Flavonoids	Isoflavones	40246-10-4	3	13833070	15117895	19102540	10292570	11339540	6.46658e+06	C16195	ko00943
mws4174	222.097	138.055	221.09	C8H15NO6	[M+H]+	N-Acetyl-D-mannosamine	Others	Saccharides	7772-94-3	3	59606.6	110813	100931	105467	62778.7	73648.6	C00645	ko00520,ko01100,ko01250
pma0692	438.239	147.044	437.231	C25H31N3O4	[M+H]+	N1,N10-Bis(p-coumaroyl)spermidine	Alkaloids	Phenolamine	114916-05-1	3	69237.4	85047.5	39721.6	39896.8	30010	52443.3	C21169	-
pma0791	521.129	273.076	520.122	C24H24O13	[M+H]+	Naringenin-7-O-(6''-malonyl)glucoside	Flavonoids	Flavanones	-	3	3.86647e+06	6.44625e+06	4.34681e+06	5.39503e+06	4.09689e+06	7.14319e+06	-	-
pme2246	300.999	185.023	302.006	C14H6O8	[M-H]-	Ellagic acid	Tannins	Tannin	476-66-4	3	39476.2	41091.8	44345.6	35117	30461.3	50892.5	C10788	-
MWSHC20164	279.159	149.024	278.152	C16H22O4	[M+H]+	Dibutyl phthalate	Phenolic acids	Phenolic acids	84-74-2	3	5.3999e+06	7.90839e+06	8.92048e+06	8.23184e+06	8.42026e+06	4.89644e+06	-	-
MWStz224	353.15	177.059	352.142	C20H20N2O4	[M+H]+	N-Feruloylserotonin	Alkaloids	Plumerane	68573-23-9	3	124627	55460.5	61816.4	124444	138297	78314.6	-	-
pmb2657	289.115	131.083	290.123	C10H18N4O6	[M-H]-	Argininosuccinic acid	Organic acids	Organic acids	2387-71-5	3	159312	206587	124557	111862	196153	149984	C03406	ko00220,ko00250,ko01100,ko01110,ko01230
pmb0665	611.161	465.1	610.153	C27H30O16	[M+H]+	Orientin-7-O-glucoside	Flavonoids	Flavones	-	3	6.82513e+06	6.54129e+06	20680715	3.78376e+06	6028330	6.71307e+06	-	-
Lmsp003655	521.202	131.049	520.194	C26H32O11	[M+H]+	Dehydrodiconiferyl alcohol-gamma'-O-glucoside	Lignans and Coumarins	Lignans	-	3	86620.3	146758	91781.2	61202.6	91297.6	109248	-	-
Lmjp003044	479.12	317.06	478.111	C22H22O12	[M+H]+	Isorhamnetin-3-O-Glucoside*	Flavonoids	Flavonols	5041-82-7	3	4113580	723617	3071105	1.27811e+06	760579	1.32217e+06	-	-
MWS201477	221.113	74.0618	220.106	C8H16N2O5	[M+H]+	Thr-Thr	Amino acids and derivatives	Amino acids and derivatives	-	3	78192.1	71531.2	78810	91188.9	76234.9	50881.9	-	-
Hmfn000531	175.02	87.01	176.032	C6H8O6	[M-H]-	L-Ascorbic acid (Vitamin C)	Others	Vitamin	50-81-7	3	144860	184892	222322	184515	168346	102943	C00072	ko00053,ko00480,ko01100,ko01110,ko01240
Lmsn002887	311.077	163.04	312.084	C14H16O8	[M-H]-	1-O-Caffeoyl-β-D-xylose	Phenolic acids	Phenolic acids	-	3	434303	233616	463917	203227	332575	366389	-	-
Hmpp003270	449.108	287.05	448.101	C21H20O11	[M+H]+	Luteolin-4'-O-glucoside*	Flavonoids	Flavones	6920-38-3	3	1.03476e+06	3304580	5689815	1383360	1.0864e+06	765390	-	-
MWS201391	246.146	166.087	245.138	C10H19N3O4	[M+H]+	Asn-Ile	Amino acids and derivatives	Amino acids and derivatives	438533-59-6	3	138904	88102.4	148761	93043.8	167157	126259	-	-
Lmpp003930	579.15	271.061	578.142	C30H26O12	[M+H]+	Apigenin-7-O-(6''-p-Coumaryl)glucoside	Flavonoids	Flavones	-	3	1.41981e+06	1.27024e+06	1.31402e+06	611603	911881	1.11954e+06	-	-
MWSHY0174	291.086	139.04	290.079	C15H14O6	[M+H]+	Epicatechin*	Flavonoids	Flavanols	490-46-0	1	1637700	1344655	1583765	405580	587880	740255	C09727	ko00941,ko01100,ko01110
Lhhp102901	361.16	189.09	360.157	C20H24O6	[M+H]+	3-(α,4-Dihydroxy-3-methoxybenzyl)-4-(hydroxy-3-methoxybenzyl)	Others	Others	-	1	171775	258245	166579	321604	215829	188465	-	-
Zblp004317	206.08	120.09	205.074	C11H11NO3	[M+H]+	(S)-3-(2-oxopropyl)-3-hydroxyindolin-2-one	Alkaloids	Plumerane	-	3	1.50309e+07	1.4587e+07	1.43071e+07	1.42756e+07	25211300	25098705	-	-
Lmrn003000	165.056	103.056	166.063	C9H10O3	[M-H]-	2-Hydroxy-3-phenylpropanoic acid	Phenolic acids	Phenolic acids	7326-19-4	3	32250.9	28603.9	39082	20211.1	36985.4	29016.8	C05607	ko00360,ko00960,ko01100,ko01110
pme0195	120.013	74.007	121.02	C3H7NO2S	[M-H]-	L-Cysteine	Amino acids and derivatives	Amino acids and derivatives	52-90-4	3	12690.3	9457.11	6111.72	10748.1	5853.84	8502.91	C00097	ko00260,ko00270,ko00311,ko00332,ko00430,ko00460,ko00470,ko00480,ko00730,ko00770,ko00920,ko00970,ko01100,ko01110,ko01200,ko01230,ko01240,ko04122
Wcfn003299	319.118	241.051	320.126	C17H20O6	[M-H]-	(2S)-3,3-bis-(4-hydroxy-3-methoxyphenyl)-propane-1,2-diol	Others	Others	-	3	33596.1	24777.7	29224.8	42398.5	24735.4	28321.9	-	-
Lmqn004838	315.015	299.992	316.022	C15H8O8	[M-H]-	3-O-Methylellagic acid	Tannins	Tannin	-	3	881479	678724	746206	442787	242220	406613	-	-
Lacp004697	409.15	229.09	408.142	C20H24O9	[M+H]+	Columbianetin Glucopyranoside	Lignans and Coumarins	Coumarins	55836-35-6	1	1.59497e+06	2.43873e+06	1.59372e+06	1.50108e+06	2.6292e+06	2.68784e+06	-	-
pme0241	123.044	79.0537	122.037	C7H6O2	[M+H]+	Benzoic acid	Phenolic acids	Phenolic acids	65-85-0	3	1.57201e+06	1.16107e+06	1.51576e+06	2.9875e+06	1.61318e+06	2.52502e+06	C00180	ko00996,ko01100,ko01110
Zmjp005288	553.16	391.1	552.148	C25H28O14	[M+H]+	5,2',5'-Trihydroxy-3,7,4'-trimethoxyflavone-2'-O-glucoside	Flavonoids	Flavones	-	3	1.38418e+07	7.75215e+06	1.06619e+07	6.7736e+06	1.25517e+07	1.05242e+07	-	-
Zajp002650	595.16	577.16	594.159	C27H30O15	[M+H]+	Vitexin-7-O-glucoside	Flavonoids	Flavones	-	2	5.56257e+06	4.19487e+06	4.13569e+06	7980995	6850995	4.30466e+06	-	-
Lmsp004301	451.12	289.07	450.116	C21H22O11	[M+H]+	3',5,5',7-Tetrahydroxyflavanone-7-O-glucoside	Flavonoids	Flavanones	-	3	4.69426e+06	1.78761e+06	740600	832146	631201	1.14018e+06	-	-
pmb3042	491.12	329.1	492.127	C23H24O12	[M-H]-	Tricin-5-O-Glucoside	Flavonoids	Flavones	32769-00-9	3	601739	541502	492497	279755	465072	516578	-	-
pmp000086	269.102	177.055	268.095	C13H16O6	[M+H]+	1-Feruloyl-sn-glycerol	Phenolic acids	Phenolic acids	-	3	68355	118549	71690	120055	221845	203485	-	-
MWSmce536	125.024	79.019	126.032	C6H6O3	[M-H]-	Methyl 2-furoate	Organic acids	Organic acids	611-13-2	3	175456	259406	192456	136976	195506	253948	-	-
MWSHY0098	307.081	139.039	306.074	C15H14O7	[M+H]+	Epigallocatechin	Flavonoids	Flavanols	970-74-1	3	113859	57826.8	79790	99481.1	62893.7	59547.4	C12136	ko00941,ko01110
mws1035	741.22	433.11	740.216	C33H40O19	[M+H]+	Kaempferol-3-O-robinoside-7-O-rhamnoside (Robinin)	Flavonoids	Flavonols	301-19-9	3	43890.5	135504	118868	80591.1	80289.6	130935	C10178	-
mws0217	76.0393	59.0128	75.032	C2H5NO2	[M+H]+	L-Glycine	Amino acids and derivatives	Amino acids and derivatives	56-40-6	3	677033	731638	216266	563237	573459	316655	C00037	ko00230,ko00260,ko00310,ko00440,ko00460,ko00470,ko00480,ko00630,ko00730,ko00860,ko00970,ko01100,ko01110,ko01200,ko01230,ko01240,ko02010
pme2060	204.124	136.061	203.117	C10H13N5	[M+H]+	N6-Isopentenyladenine	Nucleotides and derivatives	Nucleotides and derivatives	2365-40-4	3	23340	14471.7	15261.2	38651	25782.4	48345	C04083	ko00908,ko01110,ko04075
Wbtp004753	303.05	229.05	302.043	C15H10O7	[M+H]+	1,2,3,7,8-pentahydroxy-6-methylanthracene-9,10-dione	Flavonoids	Other Flavonoids	-	1	12344985	10530765	10763955	7067895	5.02378e+06	3.87998e+06	-	-
Hmhn000927	287.08	125.02	288.084	C12H16O8	[M-H]-	Phloroglucinol-1-O-β-D-glucopyranoside	Phenolic acids	Phenolic acids	-	3	109633	93914	112380	110386	63235.5	72809.2	-	-
Lhmp122023	441.101	193.049	440.096	C19H20O12	[M+H]+	3-O-caffeoyl malonyl quinic acid	Others	Others	-	3	1545005	1501210	1560170	1104270	615026	750310	-	-
Lssp210052	773.21	303.05	772.206	C33H40O21	[M+H]+	Quercetin-3-rutinoside-7-galactoside	Flavonoids	Flavonols	50867-29-3	2	12959.6	69091.8	75329.3	52983.7	30048.5	34877.4	-	-
Lssp210058	611.16	303.06	610.153	C27H30O16	[M+H]+	Quercetin-3-O-robinobioside*	Flavonoids	Flavonols	52525-35-6	1	9.22872e+07	1.26293e+08	1.13401e+08	6.54149e+07	1.15357e+08	1.22625e+08	-	-
MWS20145	451.123	289.074	450.116	C21H22O11	[M+H]+	Eriodictyol-7-O-glucoside	Flavonoids	Flavanones	38965-51-4	3	1191635	3.24463e+06	3.98313e+06	1.66276e+06	3.17277e+06	2.53882e+06	-	-
MWSmce016	138.052	78.0328	137.048	C7H7NO2	[M+H]+	Nicotinic Acid Methyl Ester(Methyl Nicotinate)	Alkaloids	Pyridine alkaloids	93-60-7	3	180120	174856	150085	131735	100110	185001	-	-
mws1299	449.11	299.05	448.101	C21H20O11	[M+H]+	Luteolin-8-C-glucoside (Orientin)	Flavonoids	Flavones	28608-75-5	1	1.24662e+07	1.07266e+07	1.24179e+07	11069455	10992120	5.98569e+06	C10114	-
Zmhp003112	611.16	287.06	610.153	C27H30O16	[M+H]+	safflor yellow A	Quinones	Quinones	-	2	300899	212636	187727	94544.5	179693	170874	-	-
mws0572	126.066	109.04	125.059	C5H7N3O	[M+H]+	5-Methylcytosine	Nucleotides and derivatives	Nucleotides and derivatives	554-01-8	3	43249.9	42114.5	59546.6	79654.2	44076.5	52694.7	C02376	ko00240,ko01100
MWSmce498	579.169	271.07	578.164	C27H30O14	[M+H]+	Apigenin-7-O-neohesperidoside (Rhoifolin)*	Flavonoids	Flavones	17306-46-6	3	1.7024e+06	1.55687e+06	3745290	823285	1494470	978575	C12627	ko00944
MWStz282	206.081	118.065	205.074	C11H11NO3	[M+H]+	3-Hydroxy-3-acetonyloxindole*	Alkaloids	Plumerane	33417-17-3	3	926550	995667	1.13104e+06	717841	874313	1.3171e+06	-	-
pmb0302	126.031	96.9696	125.024	C2H8NO3P	[M+H]+	2-Aminoethylphosphonate	Others	Others	2041-14-7	3	2366170	2372945	2729245	1922900	1526475	973592	C03557	ko00440,ko01100,ko02010
Lmnp102580	565.155	433.11	564.148	C26H28O14	[M+H]+	Apigenin-6-C-(2''-xylosyl)glucoside*	Flavonoids	Flavones	-	3	26389600	8.54745e+06	2467870	7.26709e+06	1.35021e+07	8.85972e+06	-	-
Lmnp202580	565.155	433.11	564.148	C26H28O14	[M+H]+	Apigenin-8-C-(2''-xylosyl)glucoside*	Flavonoids	Flavones	-	3	26389600	8.54745e+06	2467870	7.26709e+06	1.35021e+07	8.85972e+06	-	-
Lchp000218	209.08	121.06	208.074	C11H12O4	[M+H]+	(R)-3-ethyl-7-hydroxy-6-methoxyphthalide	Others	Others	-	3	12214395	11330525	13032465	10047620	5.47737e+06	6.43235e+06	-	-
Hmcp001824	213.07	167.06	212.059	C12H8N2O2	[M+H]+	Ailanindole	Alkaloids	Plumerane	159903-51-2	3	225342	234744	241157	251895	182822	358842	-	-
Lmmn003748	359.15	180.079	360.157	C20H24O6	[M-H]-	Isolariciresinol	Lignans and Coumarins	Lignans	548-29-8	3	231975	222792	211509	219061	127834	126527	-	-
Zmxp004480	625.176	301.071	624.169	C28H32O16	[M+H]+	Chrysoeriol-7-O-gentiobioside	Flavonoids	Flavones	-	3	219298	239203	159623	188813	305097	167336	-	-
Latp011219	149.096	121.064	148.088	C10H12O	[M+H]+	3,5-Dimethyl-2,3-dihydrobenzofuran	Others	Others	-	3	4.89136e+07	1.42981e+07	3.29741e+07	3.26566e+07	2.24209e+07	1.66958e+07	-	-
MWSmce658	193.049	153.019	192.042	C10H8O4	[M+H]+	Noreugenin; 5,7-Dihydroxy-2-Methylchromone	Others	Chromone	1013-69-0	3	20787.5	22722	27869.4	9003.87	17660.4	17826.9	C20462	-
MWS2069	139.075	77.0379	138.068	C8H10O2	[M+H]+	2-Methoxy-4-methylphenol	Phenolic acids	Phenolic acids	93-51-6	3	81135.6	117580	72511	115795	222635	146171	-	-
Wbmp003302	165.09	91.05	164.084	C10H12O2	[M+H]+	Frambinone	Others	Ketone compounds	-	3	2254375	1.02543e+06	1.13438e+06	990423	1781075	1.05981e+06	-	-
HJAP010	551.139	497.1	550.132	C25H26O14	[M+H]+	Luteolin-6,8-di-C-arabinoside	Flavonoids	Flavones	-	3	227769	113385	281055	225258	131960	127029	-	-
MW0152315	491.18	249.06	492.189	C19H32N4O9S	[M-H]-	Leu-Glu-Cys-Glu	Amino acids and derivatives	Amino acids and derivatives	-	3	804569	344301	720790	602455	314313	389752	-	-
MWS0550	133.065	55.0176	132.058	C9H8O	[M+H]+	Cinnamaldehyde	Phenolic acids	Phenolic acids	14371-10-9	3	210160	208490	301990	240205	171664	343755	C00903	ko00940,ko01100,ko01110
HJAP012	419.097	383.07	418.09	C20H18O10	[M+H]+	Luteolin-8-C-arabinoside	Flavonoids	Flavones	-	3	77620.4	78692.4	112027	87166.9	83831	149067	-	-
HJAP026	625.176	463.13	624.169	C28H32O16	[M+H]+	Chrysoeriol-6-C-glucoside-4'-O-glucoside	Flavonoids	Flavones	-	3	7616825	3798335	4782330	3355755	3.48072e+06	5962300	-	-
HJN087	433.12	271.06	434.121	C21H22O10	[M-H]-	Naringenin-4'-O-glucoside*	Flavonoids	Flavanones	-	2	138405	215117	183195	200384	134792	101542	-	-
pme1439	165.055	119.049	164.047	C9H8O3	[M+H]+	p-Coumaric acid	Phenolic acids	Phenolic acids	501-98-4	3	1.77097e+06	1.74964e+06	2.14208e+06	1.78359e+06	1.76667e+06	3105165	C00811	ko00130,ko00350,ko00940,ko00950,ko01100,ko01110
MW0146247	559.31	397.26	558.301	C24H42N6O9	[M+H]+	Asp-Pro-Thr-Lys-Val	Amino acids and derivatives	Amino acids and derivatives	-	3	1.83758e+06	1.9142e+06	3.4627e+06	1.63591e+06	2.96576e+06	1.7436e+06	-	-
Lafp004228	371.21	209.15	370.199	C19H30O7	[M+H]+	(6R,9R)-3-Oxo-α-ionol-β-D-glucoside	Terpenoids	Sesquiterpenoids	-	2	171522	430655	183000	145098	198884	291360	-	-
pme0368	579.171	271.063	578.164	C27H30O14	[M+H]+	Apigenin-7-O-rutinoside (Isorhoifolin)*	Flavonoids	Flavones	552-57-8	3	1.86198e+06	1.30026e+06	3418895	953484	1561855	831871	-	-
mws0254	156.08	110.07	155.07	C6H9N3O2	[M+H]+	L-Histidine	Amino acids and derivatives	Amino acids and derivatives	71-00-1	1	1.61834e+07	1.63789e+07	1.74083e+07	1.44938e+07	7609795	1.59975e+07	C00135	ko00340,ko00410,ko00470,ko00970,ko01100,ko01110,ko01230,ko02010
MWSmce301	191.03	173.02	190.027	C10H6O4	[M+H]+	Coumarin-3-carboxylic Acid	Lignans and Coumarins	Coumarins	531-81-7	3	1.12686e+06	1605675	1.10179e+06	1603985	1.19857e+06	762268	-	-
zjgp122321	355.1	163.05	354.095	C16H18O9	[M+H]+	4-O-acetyl-3-O-caffeoyl-2-C-methyl-D-erythronate	Others	Others	-	1	2.46389e+07	2.56057e+07	1.76826e+07	4.42317e+07	5.4723e+07	2.56019e+07	-	-
MWS201470	306.159	175.12	305.152	C11H23N5O3S	[M+H]+	Met-Arg	Amino acids and derivatives	Amino acids and derivatives	60461-10-1	3	87655	73937.2	50724.4	45017	52998.8	86662.5	-	-
Lmgp004217	609.18	445.11	608.174	C28H32O15	[M+H]+	Diosmetin-8-C-(2''-O-rhamnosyl)glucoside	Flavonoids	Flavones	98891-92-0	1	43260300	54237370	45638475	26487205	1.37394e+07	29592695	-	-
pmp000394	551.176	419.133	550.169	C26H30O13	[M+H]+	Naringenin-7-O-(2''-O-apiosyl)glucoside	Flavonoids	Flavanones	-	3	45104.5	63244	57615.8	43029.3	90606.2	87553	-	-
MW0156904	307.13	289.12	306.118	C10H18N4O7	[M+H]+	Ser-Ser-Asn	Amino acids and derivatives	Amino acids and derivatives	-	3	9963680	10990320	9902985	7708220	4.2252e+06	4.36257e+06	-	-
MW0158225	417.17	373.18	416.17	C20H24N4O6	[M+H]+	Trp-Pro-Asp	Amino acids and derivatives	Amino acids and derivatives	-	3	925673	911094	980819	1470895	779656	861105	-	-
MWSCX017	165.053	119.051	164.047	C9H8O3	[M+H]+	4-hydroxyphenyl acrylaldehyde	Others	Aldehyde compounds	-	3	1.6347e+06	2.21659e+06	1.48371e+06	1.8176e+06	1.36283e+06	2780215	-	-
zjgp122323	355.1	163.04	354.095	C16H18O9	[M+H]+	4-O-acetyl-3-O-caffeoyl-2-C-methyl-D-erythronate(iso-2)	Others	Others	-	1	305313	282386	224556	230477	109806	158922	-	-
MWSmce412	193.121	91.0582	192.115	C12H16O2	[M+H]+	Senkyunolide A	Others	Lactones	63038-10-8	3	177034	214312	192657	158718	73408.9	148031	C17853	-
pmn001370	681.24	519.188	682.247	C32H42O16	[M-H]-	Pinoresinol-4,4'-O-di-O-glucoside	Lignans and Coumarins	Lignans	63902-38-5	1	180120	76598.9	80898.9	108113	92452.6	179655	-	-
pmf0096	88.988	70.9774	89.9953	C2H2O4	[M-H]-	Oxalic acid	Organic acids	Organic acids	144-62-7	3	52769	44075.2	46555.4	64019.7	44991.7	94284	C00209	ko00230,ko00630,ko01100
pmp001245	280.154	221.079	280.154	C15H22NO4+	[M]+	Feruloylcholine	Alkaloids	Phenolamine	85927-25-9	3	133614	164312	172096	138503	101678	210304	-	-
pme0010	106.05	70.0287	105.043	C3H7NO3	[M+H]+	L-Serine	Amino acids and derivatives	Amino acids and derivatives	56-45-1	3	398562	357116	385801	435702	870995	542670	C00065	ko00260,ko00261,ko00270,ko00460,ko00470,ko00564,ko00600,ko00630,ko00920,ko00970,ko01100,ko01110,ko01200,ko01230,ko01240,ko02010
Lmdp004892	535.11	287.05	534.101	C24H22O14	[M+H]+	Kaempferol-3-O-(6''-malonyl)galactoside*	Flavonoids	Flavonols	-	1	80792485	53655005	72723360	39709060	1.81516e+07	35987315	-	-
Latp004456	191.07	176.05	190.062	C11H10O3	[M+H]+	2,5-Dimethyl-7-hydroxychromone	Others	Chromone	38412-47-4	2	2.71528e+06	4647990	2.59245e+06	4369370	2.71762e+06	2.18536e+06	-	-
Lmmp003109	305.102	139.037	304.095	C16H16O6	[M+H]+	3'-O-Methyl-epicatechin	Flavonoids	Flavanols	76549-34-3	3	388521	375885	377393	338740	155303	315355	-	-
Smlp002877	433.113	301.071	433.113	C21H21O10+	[M]+	Peonidin-3-O-arabinoside	Flavonoids	Anthocyanidins	-	3	71743.6	112171	87290.8	74403.7	47749.3	103375	-	-
Hmjp003123	479.082	303.064	478.075	C21H18O13	[M+H]+	Quercetin-5-O-glucuronide	Flavonoids	Flavonols	-	3	81695	46646.7	71690	44679.6	81695	45272	-	-
MWSHY0141	163.04	107.05	162.032	C9H6O3	[M+H]+	7-Hydroxy-4-chromone	Others	Chromone	59887-89-7	3	2.71772e+07	2.40057e+07	2.60903e+07	49147360	2.29178e+07	48079615	-	-
MWSmce329	185.08	125.059	184.074	C9H12O4	[M+H]+	Antiarol; 3,4,5-Trimethoxyphenol	Phenolic acids	Phenolic acids	642-71-7	3	144578	197840	174072	165748	130906	74221.1	C10765	-
pmp000120	463.12	427.1	462.116	C22H22O11	[M+H]+	Diosmetin-6-C-glucoside	Flavonoids	Flavones	-	2	7760975	10269310	11808860	8178410	12575605	5.98547e+06	-	-
Zmhp002409	611.16	491.12	610.153	C27H30O16	[M+H]+	Isoluteolin-6,8-di-C-glucoside	Flavonoids	Flavones	-	3	432499	320425	430534	606295	393320	286453	-	-
Lmwp102904	219.15	174.092	218.142	C13H18N2O	[M+H]+	N,N-Dimethyl-5-methoxytryptamine	Alkaloids	Plumerane	1019-45-0	3	455735	378840	459075	149910	340410	305330	C08309	-
MWS201480	253.119	136.077	252.111	C12H16N2O4	[M+H]+	Tyr-Ala	Amino acids and derivatives	Amino acids and derivatives	730-08-5	3	48827.4	22830.5	52896.5	54563.3	42856.4	23898	-	-
MWStz083	197.129	70.0674	196.121	C10H16N2O2	[M+H]+	Cyclo(D-Val-L-Pro)	Amino acids and derivatives	Amino acids and derivatives	27483-18-7	3	236870	198475	330390	111354	138749	228520	-	-
Smsp001641	625.176	317.066	625.176	C28H33O16+	[M]+	Petunidin-3-O-rutinoside	Flavonoids	Anthocyanidins	-	3	136535	336720	386439	463177	233862	267991	-	-
pmb2406	510.355	184.073	509.348	C25H52NO7P	[M+H]+	LysoPC 17:0	Lipids	LPC	50930-23-9	3	58991.4	47790.8	50628.1	3980.76	3164.65	1721.23	-	-
pmb0962	235.165	118.086	234.158	C10H22N2O4	[M+H]+	L-Lysine-Butanoic Acid	Amino acids and derivatives	Amino acids and derivatives	80407-71-2	3	51916.9	32090.1	66748.2	69288.3	61340.3	29662.5	-	-
MW0150171	539.2	359.14	540.207	C23H32N4O11	[M-H]-	Glu-Thr-Tyr-Glu	Amino acids and derivatives	Amino acids and derivatives	-	3	77173.6	82776.9	90799.7	87748.7	125036	55023.6	-	-
Lmbp002592	611.161	287.054	610.153	C27H30O16	[M+H]+	Kaempferol-3,7-O-diglucoside*	Flavonoids	Flavonols	25615-14-9	2	263842	309021	430655	240295	551070	392210	-	-
Lmjp002906	479.118	317.065	478.111	C22H22O12	[M+H]+	Rhamnetin-3-O-Glucoside	Flavonoids	Flavonols	27875-34-9	3	2.3479e+06	2.40638e+06	3497435	695926	645506	1262240	-	-
MWSHY0008	433.11	313.07	432.106	C21H20O10	[M+H]+	Apigenin-6-C-glucoside (Isovitexin)*	Flavonoids	Flavones	38953-85-4	1	140631185	109830725	135922745	57719765	88274065	3.98758e+07	C01714	ko00944
Lhhp120814	165.09	91.0542	164.084	C10H12O2	[M+H]+	Eugenol	Phenolic acids	Phenolic acids	97-53-0	3	3226140	1.68142e+06	4142745	1.6287e+06	3103460	1.65924e+06	C10453	ko00940
MWSmce471	148.096	86.0626	147.089	C6H13NO3	[M+H]+	Fagomine	Alkaloids	Piperidine alkaloids	53185-12-9	3	40204.4	62559	74310.6	41106	43856.4	80155.5	C10144	-
MWSHY0060	459.092	139.039	458.085	C22H18O11	[M+H]+	Epigallocatechin-3-O-gallate*	Flavonoids	Flavanols	989-51-5	3	58476.4	48320	51680	38345	41680	17755.7	C09731	-
MWSHY0181	433.113	313.072	432.106	C21H20O10	[M+H]+	Apigenin-8-C-Glucoside (Vitexin)*	Flavonoids	Flavones	3681-93-4	1	4070710	2931540	3285815	1205080	1615785	684487	C01460	ko00941,ko00944
MWSHY0094	459.092	139.039	458.085	C22H18O11	[M+H]+	Gallocatechin gallate*	Flavonoids	Flavanols	4233-96-9	3	42383.4	45281.9	70020	26706.7	48033.3	63401.1	-	-
Zmsp000494	326.146	164.092	325.137	C12H23NO9	[M+H]+	2-O-α-D-glucosyl-1-deoxynojirimycin	Alkaloids	Piperidine alkaloids	-	3	121441	138405	168440	88365	56637.1	130065	-	-
Zmsp000380	326.146	164.092	325.137	C12H23NO9	[M+H]+	6-O-α-D-galactosyl-1-deoxynojirimycin	Alkaloids	Piperidine alkaloids	-	3	121441	138405	168440	88365	56637.1	130065	-	-
Lmhp002764	211.13	70.0686	210.137	C11H18N2O2	[M+H]+	Cyclo(Pro-Leu)*	Amino acids and derivatives	Amino acids and derivatives	5654-86-4	3	435990	946475	479668	824050	340894	690005	-	-
MWSHY0130	451.123	305.057	450.116	C21H22O11	[M+H]+	Taxifolin-7-O-rhamnoside	Flavonoids	Flavanonols	137592-12-2	3	407255	303660	641445	266920	111160	203485	-	-
MWSmce341	279.159	149.033	278.152	C16H22O4	[M+H]+	Butyl isobutyl phthalate*	Phenolic acids	Phenolic acids	17851-53-5	3	8.89607e+06	6.22546e+06	6.52589e+06	1.12173e+07	5.45297e+06	6.34888e+06	-	-
zjzp122718	311.091	293.078	310.084	C18H14O5	[M+H]+	Osajaxanthone	Flavonoids	Other Flavonoids	1043-08-9	3	446656	634930	472416	495740	897936	442320	-	-
Lmtp004044	597.145	303.043	596.138	C26H28O16	[M+H]+	Quercetin-3-O-apiosyl(1→2)galactoside	Flavonoids	Flavonols	-	3	63350	60020	40010	43345	93370	106034	-	-
pmb0541	697.161	287.055	697.161	C30H33O19+	[M]+	Cyanidin-3-O-(6''-O-malonyl)glucoside-5-O-glucoside	Flavonoids	Anthocyanidins	-	3	91682.8	220175	72094.2	89527.1	208490	138405	-	-
Wbjp003633	227.12	212.09	226.111	C14H14N2O	[M+H]+	9-ethyl-1-methyl-2H-pyrido[3,4-b]indol-7-one	Alkaloids	Alkaloids	-	3	223515	999599	1.15493e+06	940625	2.30663e+06	1767230	-	-
MWSHY0113	465.1	303.06	464.096	C21H20O12	[M+H]+	Quercetin-3-O-galactoside (Hyperin)*	Flavonoids	Flavonols	482-36-0	1	1.73881e+07	6.23337e+06	1.27916e+07	1.05752e+07	15514035	6.53212e+06	C10073	-
Cmsp004086	303.09	229.08	302.079	C16H14O6	[M+H]+	Dihydrokaempferide	Flavonoids	Flavanonols	137225-59-3	3	17049235	7543045	7.2724e+06	1.71418e+06	3844550	4213095	-	-
MWSslk076	140.034	105.02	139.027	C6H5NO3	[M+H]+	Nicotinic acid N-oxide	Alkaloids	Pyridine alkaloids	2398-81-4	3	9	9	9	6589.96	11627.9	16058	-	-
Wcfn005927	267.06	249.05	268.074	C16H12O4	[M-H]-	Madeirin	Quinones	Quinones	-	3	35423.3	101144	52944.2	40576.1	82709.6	44597.5	-	-
MWSmce017	179.03	133.03	178.027	C9H6O4	[M+H]+	Daphnetin	Lignans and Coumarins	Coumarins	486-35-1	2	9.26406e+06	10744210	6.17186e+06	12326840	8883885	5.05122e+06	C03093	-
Zmxp003107	611.161	287.057	610.153	C27H30O16	[M+H]+	Luteolin-7,3'-di-O-glucoside	Flavonoids	Flavones	52187-80-1	3	178676	351571	205330	245215	124351	126778	-	-
MWSHC2083	239.2	105.07	238.193	C15H26O2	[M+H]+	1β,6α-Dihydroxy-4(14)-桉叶烯	Others	Others	70389-88-7	3	163914	201908	177364	268978	120575	160949	-	-
MW0158646	459.19	415.2	458.18	C22H26N4O7	[M+H]+	Tyr-Tyr-Asn	Amino acids and derivatives	Amino acids and derivatives	-	3	7942245	5814710	9484175	4.66338e+06	11545135	8501550	-	-
Lmsp003161	757.22	287.06	756.211	C33H40O20	[M+H]+	Kaempferol-3-O-sophoroside-7-O-rhamnoside*	Flavonoids	Flavonols	-	3	421266	308617	3135825	1.08709e+06	498421	1.25488e+06	-	-
pmp001105	757.219	287.055	756.211	C33H40O20	[M+H]+	Kaempferol-3-O-neohesperidoside-7-O-glucoside*	Flavonoids	Flavonols	-	3	421266	308617	3135825	1.08709e+06	498421	1.25488e+06	-	-
MWSmce182	148.036	102.031	147.032	C8H5NO2	[M+H]+	Isatin	Alkaloids	Plumerane	91-56-5	3	116720	140075	186795	166219	380515	230190	C11129	-
MWSHC20172	193.05	178.03	192.042	C10H8O4	[M+H]+	Isoscopoletin (6-Hydroxy-7-Methoxycoumarin)	Lignans and Coumarins	Coumarins	776-86-3	3	3526475	7.30667e+06	7.5496e+06	13684685	7.58798e+06	6.30192e+06	C18079	ko00999
Wagp004803	427.2	247.13	426.189	C21H30O9	[M+H]+	Abscisic acid D-glucopyranosyl ester	Others	Others	-	1	260245	222892	335400	356583	196810	497540	-	-
Lmmp002995	713.15	303.06	712.149	C30H32O20	[M+H]+	Quercetin-7-O-(2''-malonyl)glucosyl-5-O-glucoside	Flavonoids	Flavonols	-	3	688330	559435	500885	661540	510920	256507	-	-
pmn001610	307.264	307.264	308.272	C20H36O2	[M-H]-	Eicosadienoic acid	Lipids	Free fatty acids	5598-38-9	3	118153	135502	79601.2	42865	89185.8	46683.6	C16525	ko01040
Zmhp002640	773.21	303.05	772.206	C33H40O21	[M+H]+	6-Hydroxykaempferol-3-O-Rutinoside-6-O-glucoside	Flavonoids	Flavonols	-	1	6475685	2139285	1963450	349237	701521	348444	-	-
Lmmp002334	773.21	303.05	772.206	C33H40O21	[M+H]+	Quercetin-3-O-rutinoside-7-O-glucoside	Flavonoids	Flavonols	-	1	6475685	2139285	1963450	349237	701521	348444	-	-
Hmcp002207	479.118	317.06	478.111	C22H22O12	[M+H]+	Isorhamnetin-7-O-glucoside (Brassicin)*	Flavonoids	Flavonols	6743-96-0	3	1252150	451202	1085795	926340	352721	847520	-	-
Zmsp004363	507.117	303.052	506.106	C23H22O13	[M+H]+	Quercetin-3-O-(6''-O-acetyl)glucoside	Flavonoids	Flavonols	-	3	132643	183557	327045	133400	183455	70443.6	-	-
Lmzn001925	239.09	195.1	240.1	C12H16O5	[M-H]-	3,4'-Dihydroxy-3'-methoxybenzenepentanoic acid	Phenolic acids	Phenolic acids	-	1	294303	176709	162859	156154	258344	107956	-	-
Lmjp002461	611.16	303.05	610.153	C27H30O16	[M+H]+	Quercetin-3-O-neohesperidoside*	Flavonoids	Flavonols	29662-79-1	1	105871915	30262975	294833185	1.4959e+07	3.98607e+07	3.10512e+07	-	-
Lmsp004166	611.16	303.05	610.153	C27H30O16	[M+H]+	Quercetin-3-O-glucoside-7-O-rhamnoside*	Flavonoids	Flavonols	-	1	105871915	30262975	294833185	1.4959e+07	3.98607e+07	3.10512e+07	-	-
Smgp004575	465.1	303.05	464.096	C21H20O12	[M+H]+	Quercetin-5-O-β-D-glucoside*	Flavonoids	Flavonols	-	1	1.95161e+07	7.47642e+06	1.31415e+07	1.24852e+07	4.98698e+06	1.30739e+07	-	-
MWSHY0046	465.1	303.05	464.096	C21H20O12	[M+H]+	Quercetin-3-O-glucoside (Isoquercitrin)*	Flavonoids	Flavonols	482-35-9	1	1.95161e+07	7.47642e+06	1.31415e+07	1.24852e+07	4.98698e+06	1.30739e+07	C05623	ko00944,ko01100,ko01110
MWSHC2067	139.04	65.04	138.032	C7H6O3	[M+H]+	Protocatechualdehyde	Phenolic acids	Phenolic acids	139-85-5	2	1.63907e+06	3.00879e+06	1.71441e+06	2822705	1.38626e+06	1.38976e+06	C16700	ko00950
MWSslk066	169.05	65.0388	168.042	C8H8O4	[M+H]+	3-Hydroxy-4-methoxybenzoic acid; Isovanillic Acid	Phenolic acids	Phenolic acids	645-08-9	3	881679	1678170	1862100	576945	1523105	1104270	-	-
Lsjp211202	225.15	123.08	224.141	C13H20O3	[M+H]+	Blumenol A	Others	Others	23526-45-6	2	882730	417986	973320	474042	1060605	576170	-	-
MWStz104	182.081	124.052	181.074	C9H11NO3	[M+H]+	3,4-Dimethoxybenzamide	Alkaloids	Phenolamine	1521-41-1	3	61047.6	116720	79495.6	96705	135070	50018.7	-	-
MWSHY0061	595.16	287.06	594.159	C27H30O15	[M+H]+	Kaempferol-3-O-neohesperidoside*	Flavonoids	Flavonols	32602-81-6	1	158532625	1.64395e+07	6.68296e+07	35220475	2.12682e+07	1.41462e+07	-	-
MW0153688	465.18	303.06	464.173	C21H28N4O6S1	[M+H]+	Met-Trp-Glu	Amino acids and derivatives	Amino acids and derivatives	-	3	36402920	31538125	66604895	9.95695e+06	27308320	2.00546e+07	-	-
MWS0700	254.088	206.068	253.081	C9H11N5O4	[M+H]+	Neopterin	Alkaloids	Alkaloids	2009-64-5	3	14143.3	11619.9	23340	14495.9	30010	40010	C05926	ko00790
MWS201430	251.107	104.053	250.099	C9H18N2O4S	[M+H]+	Met-Thr	Amino acids and derivatives	Amino acids and derivatives	40883-16-7	3	4806.46	8175.42	12157.6	5478.65	10334.6	14789.5	-	-
MWStz170	227.14	86.06	226.132	C11H18N2O3	[M+H]+	Cyclo(L-Leu-trans-4-hydroxy-L-Pro)	Amino acids and derivatives	Amino acids and derivatives	115006-86-5	2	605372	966605	538695	1184915	1215165	448272	-	-
mws1000	287.056	149.024	288.063	C15H12O6	[M-H]-	Fustin	Flavonoids	Flavanonols	20725-03-5	3	60020	40034.7	21794.9	21778.6	32916.4	12454.2	C01378	ko00941
Zmhp002714	301.072	286.048	300.063	C16H12O6	[M+H]+	5,6,7-Tetrahydroxy-8-methoxyflavone	Flavonoids	Flavones	-	3	40563.1	162583	94639.8	142079	137509	52114.8	-	-
Hmcp001636	509.128	347.07	508.122	C23H24O13	[M+H]+	Limocitrin-7-O-glucoside*	Flavonoids	Flavonols	-	3	564455	370485	584535	439015	265250	690005	-	-
pme3285	275.091	139.039	274.084	C15H14O5	[M+H]+	Afzelechin (3,5,7,4'-Tetrahydroxyflavan)	Flavonoids	Flavanols	2545-00-8	3	150085	176780	156760	43345	116720	118390	C09320	ko00941,ko01110
Lssp210056	465.1	303.05	464.096	C21H20O12	[M+H]+	Quercetin3-O-galactoside	Flavonoids	Flavonols	-	1	1.18898e+08	9.18856e+07	213884405	1.24106e+08	232954725	1.00561e+08	-	-
Rfmb26201	621.22	417.16	622.226	C30H38O14	[M-H]-	Syringaresinol-4'-O-(6''-acetyl)glucoside	Lignans and Coumarins	Lignans	-	1	2.52669e+06	383350	1.97914e+06	538980	1.47965e+06	1.45536e+06	-	-
mws0093	179.071	146.038	180.079	C10H12O3	[M-H]-	Coniferyl alcohol	Phenolic acids	Phenolic acids	458-35-5	3	55082.4	81103.7	128161	65645.9	169566	104573	C00590	ko00940,ko00999,ko01100,ko01110
MWSHY0064	625.17	317.07	624.169	C28H32O16	[M+H]+	Isorhamnetin-3-O-neohesperidoside*	Flavonoids	Flavonols	55033-90-4	1	1.65349e+06	6473945	1.07808e+06	554740	1.57983e+06	1.23106e+06	-	-
pmb0751	321.097	147.044	320.09	C16H16O7	[M+H]+	Trans-5-O-(p-Coumaroyl)shikimate	Phenolic acids	Phenolic acids	-	3	405580	109946	505900	93994.3	158838	248749	C02947	ko00940,ko00941,ko00945,ko01100,ko01110
MWSmce700	109.075	94.0521	108.069	C6H8N2	[M+H]+	2-Ethylpyrazine	Alkaloids	Alkaloids	13925-00-3	3	458872	523429	413951	1063965	472455	542705	-	-
pmp000087	269.1	177.05	268.095	C13H16O6	[M+H]+	2-Feruloyl-sn-glycerol	Phenolic acids	Phenolic acids	-	3	621355	237994	474125	234747	552740	679960	-	-
MWStz025	192.065	146.061	191.058	C10H9NO3	[M+H]+	1-Methoxyindole-3-Carboxylic Acid*	Alkaloids	Plumerane	91913-76-7	3	103686	79040.1	166686	138312	78874.6	55412	-	-
MWStz045	192.065	146.061	191.058	C10H9NO3	[M+H]+	3,4-Dihydro-6,7-(methylenedioxy)-2(1H)-quinolinone*	Alkaloids	Quinoline alkaloids	94527-34-1	3	103686	79040.1	166686	138312	78874.6	55412	-	-
MWSHY0135	625.176	317.075	624.169	C28H32O16	[M+H]+	Isorhamnetin-3-O-rutinoside (Narcissin)*	Flavonoids	Flavonols	604-80-8	1	1.61732e+06	2544200	813220	626077	775868	266818	-	-
MWSmce024	355.096	193.047	354.095	C16H18O9	[M+H]+	Scopoletin-7-O-glucoside (Scopolin)	Lignans and Coumarins	Coumarins	531-44-2	3	886641	834932	571548	1270650	1371580	477058	C01527	ko00999,ko01110
Wagp003033	293.187	177.055	292.179	C16H24N2O3	[M+H]+	N-trans-Feruloyl-1,6-Hexanediamine	Alkaloids	Phenolamine	-	3	286175	213502	243119	124688	217825	338817	-	-
Lmlp005236	451.12	289.08	450.116	C21H22O11	[M+H]+	Dihydrokaempferol-3-O-glucoside	Flavonoids	Flavanonols	31049-08-8	3	2.25638e+06	1.59293e+06	2.23831e+06	4020990	1.53216e+06	2.40465e+06	-	-
Lmcp004624	301.071	258.052	300.063	C16H12O6	[M+H]+	3-Methylkaempferol	Flavonoids	Flavonols	1592-70-7	3	206820	105097	135763	82743.4	74485.2	167860	C05902	-
Zmcp002666	627.14	303.05	626.148	C27H30O17	[M+H]+	Quercetin-3,7-Di-O-glucoside	Flavonoids	Flavonols	-	2	6.76198e+06	1.14181e+07	9.16697e+06	6.10079e+06	7.1743e+06	2.41331e+06	-	-
MW0149933	505.23	163.03	504.218	C19H32N6O10	[M+H]+	Glu-Asn-Lys-Asp	Amino acids and derivatives	Amino acids and derivatives	-	3	53774.5	103954	56205	22674.8	64356.7	43786.4	-	-
MWS1805	102.128	57.0696	101.12	C6H15N	[M+H]+	Hexylamine	Alkaloids	Alkaloids	111-26-2	3	92930.4	98683	120106	69509.4	130438	53350	C08306	-
MWSHY0080	595.17	287.06	594.159	C27H30O15	[M+H]+	Luteolin-7-O-neohesperidoside (Lonicerin)*	Flavonoids	Flavones	25694-72-8	1	2.19872e+07	1.13363e+07	78590355	2.29853e+07	40295480	1.55155e+07	C12630	ko00944
MWSslk254	595.166	287.06	594.159	C27H30O15	[M+H]+	Kaempferol-3-O-glucorhamnoside*	Flavonoids	Flavonols	40437-72-7	1	2.19872e+07	1.13363e+07	78590355	2.29853e+07	40295480	1.55155e+07	-	-
Lmsp004670	595.17	287.06	594.159	C27H30O15	[M+H]+	Kaempferol-3-O-glucoside-7-O-rhamnoside*	Flavonoids	Flavonols	2392-95-2	1	2.19872e+07	1.13363e+07	78590355	2.29853e+07	40295480	1.55155e+07	-	-
mws4163	665.215	485.15	666.222	C24H42O21	[M-H]-	Nystose	Others	Saccharides	13133-07-8	3	42487.8	64476	60445.7	26859.4	82369.9	72010.5	-	-
MWSslk207	453.339	371.255	454.345	C30H46O3	[M-H]-	3-Oxolanosta-8,24-dien-21-oic acid (Beta-Elemonic acid)	Terpenoids	Triterpene	28282-25-9	3	30463.8	10296	34729.9	29911.6	10035.4	30773.2	-	-
